# Supplementary material for: Binding of inhibitors to the monomeric and dimeric SARS-CoV-2 Mpro
Source: PubMed Central journal article supplement (PMC8694027; doi:10.1039/d0ra09858b), 2021-01-13
Supplement: RA-011-D0RA09858B-s001.pdf [file RA-011-D0RA09858B-s001.pdf]

## Supporting information

# Binding of Inhibitors to the Monomeric and Dimeric SARS-CoV-2 Mpro

Nguyen Minh Tam,<sup>ab</sup> Pham Cam Nam,<sup>c</sup> Duong Tuan Quang,<sup>d</sup> Nguyen Thanh Tung,<sup>ef</sup> and Van V. Vu,<sup>g</sup> and Son Tung Ngo<sup>bh\*</sup>

<sup>a</sup>*Computational Chemistry Research Group, Ton Duc Thang University, Ho Chi Minh City, Vietnam*

<sup>b</sup>*Faculty of Applied Sciences, Ton Duc Thang University, Ho Chi Minh City, Vietnam*

<sup>c</sup>*Department of Chemistry, The University of Danang, University of Science and Technology, Danang, Vietnam*

<sup>d</sup>*University of Education, Hue University, Vietnam*

<sup>e</sup>*Institute of Materials Science, Vietnam Academy of Science and Technology, Hanoi, Vietnam*

<sup>f</sup>*Graduate University of Science and Technology, Vietnam Academy of Science and Technology, Hanoi, Vietnam*

<sup>g</sup>*NTT Hi-Tech Institute, Nguyen Tat Thanh University, Ho Chi Minh City, Vietnam*

<sup>h</sup>*Laboratory of Theoretical and Computational Biophysics, Ton Duc Thang University, Ho Chi Minh City, Vietnam*

Email: [ngosontung@tdtu.edu.vn](mailto:ngosontung@tdtu.edu.vn)

**Table S1.** The binding pose of ligands to SARS-CoV-2 Mpro via PyMOL.

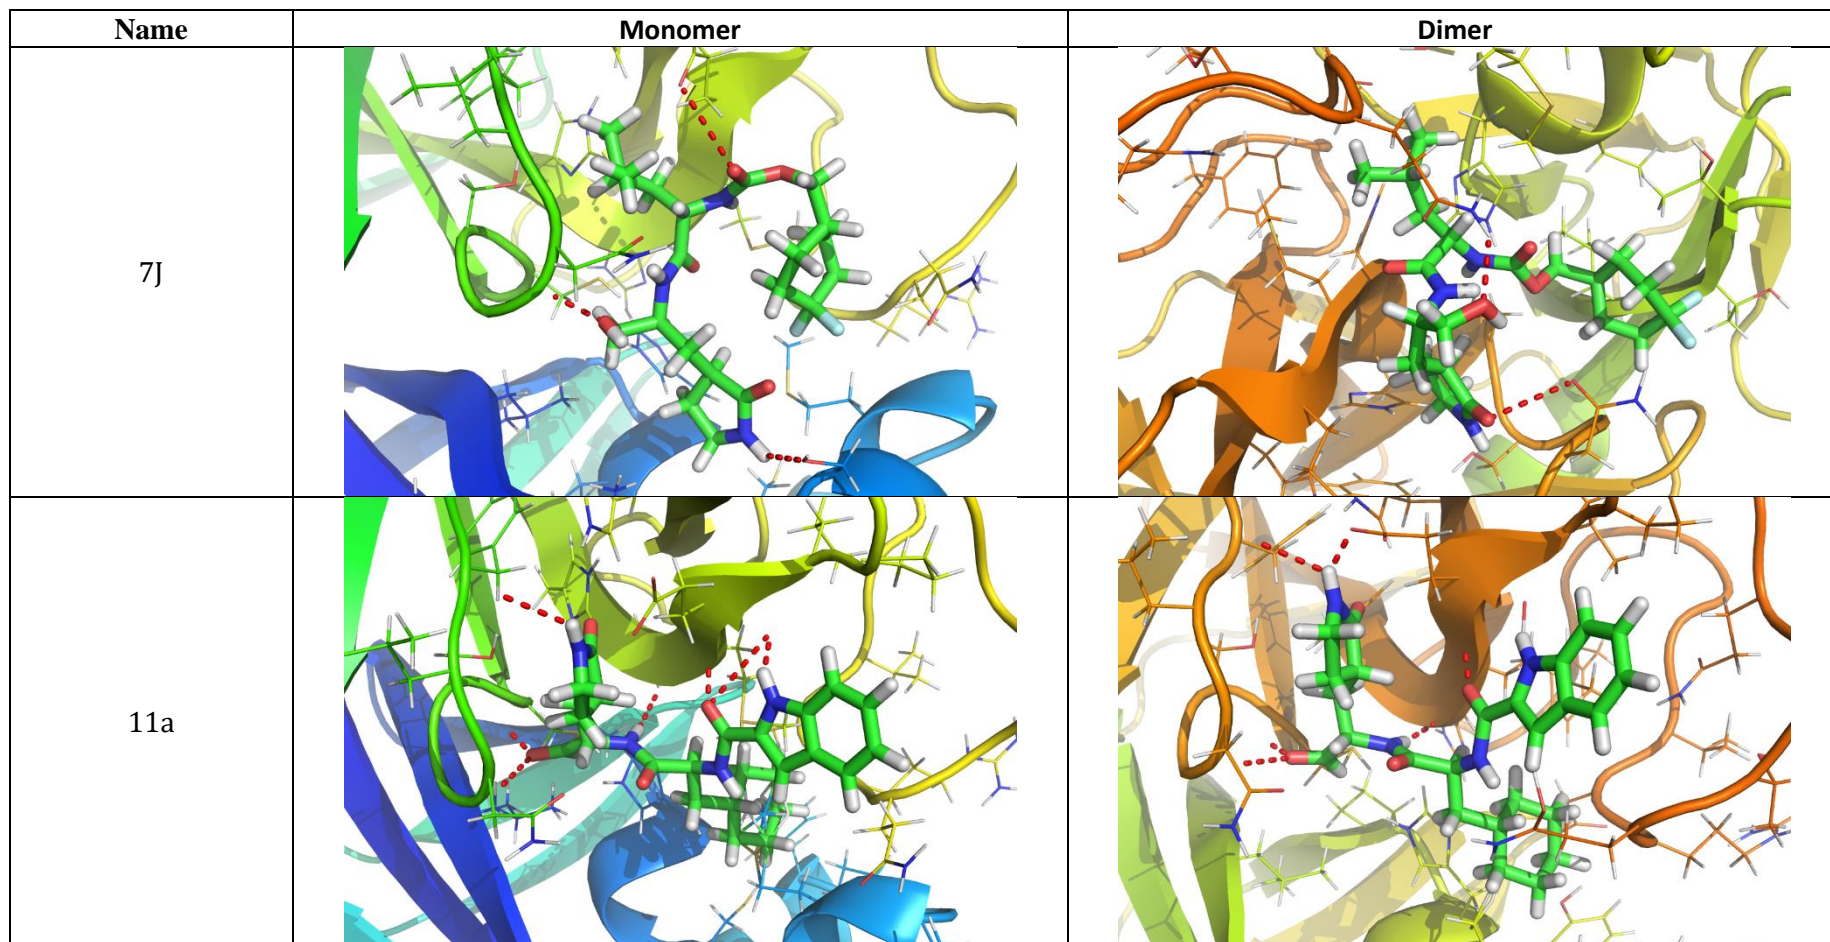

11b

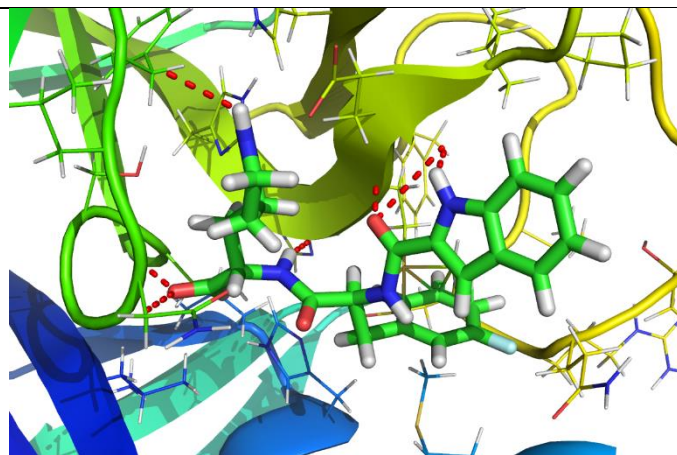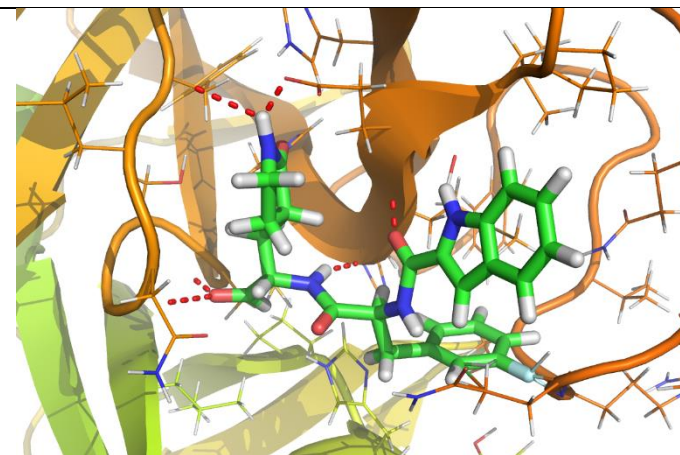

11r

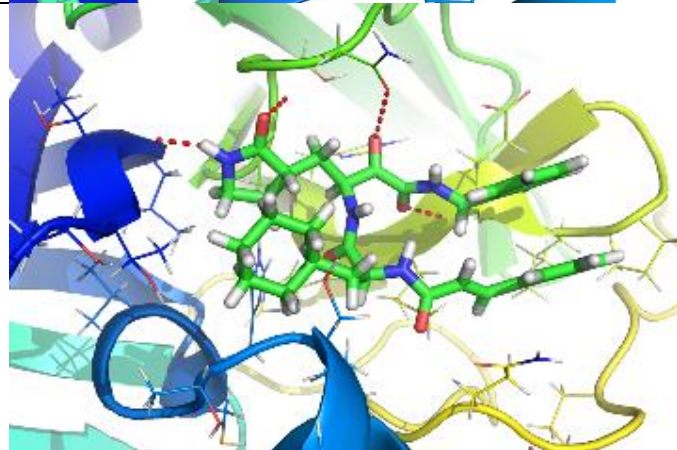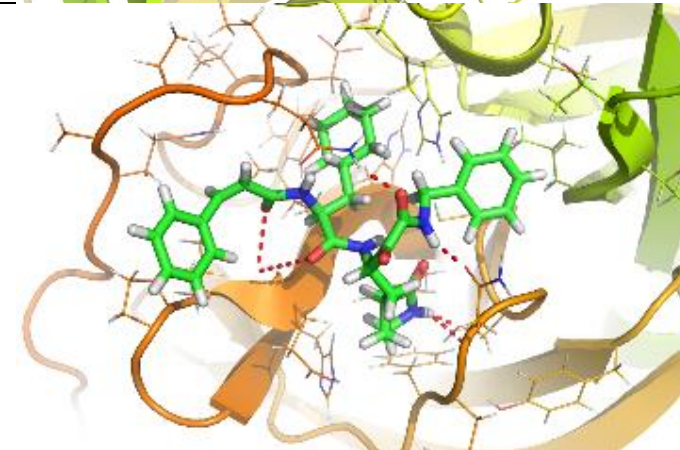



13a

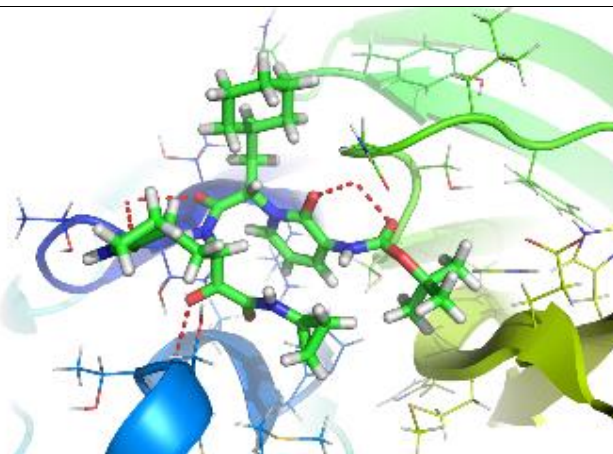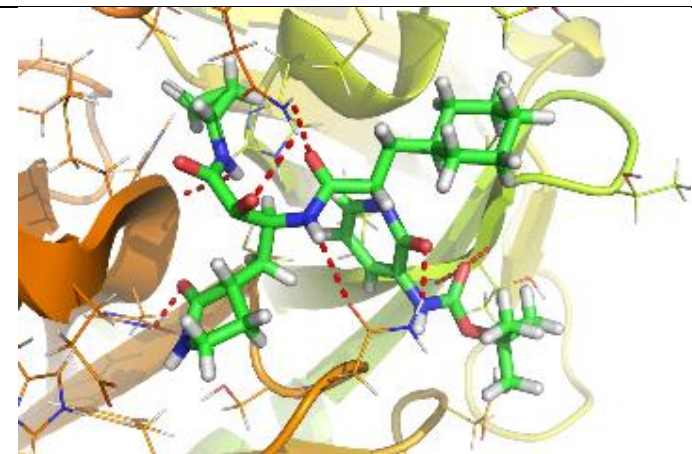

13b

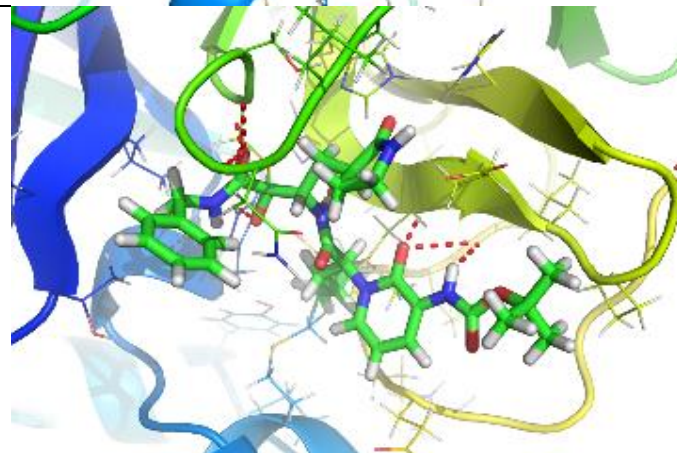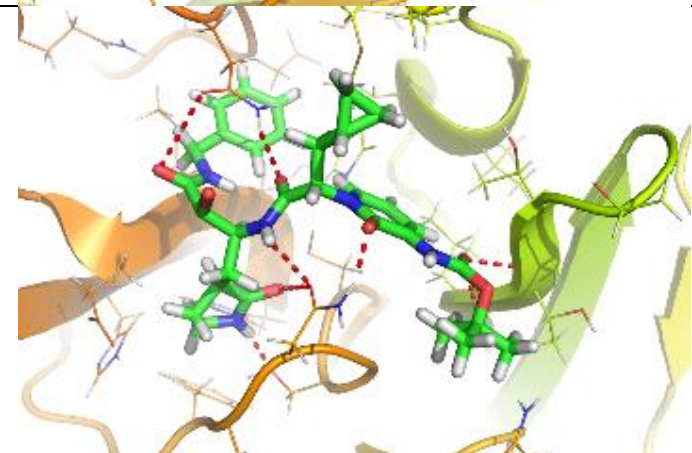

Calpain inhibitor I

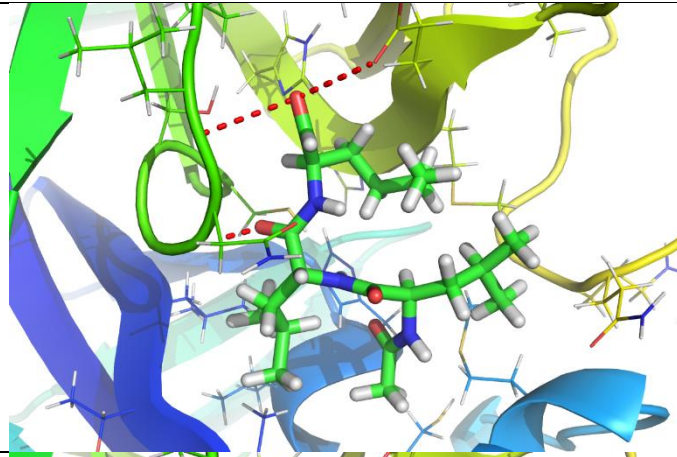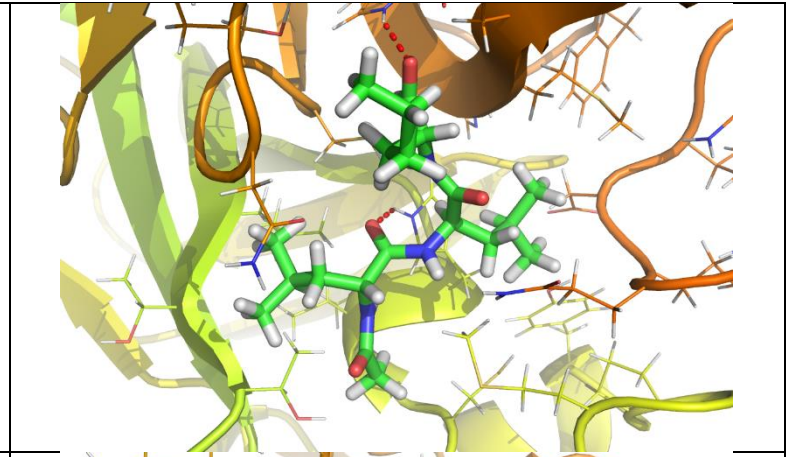

Calpain inhibitor II

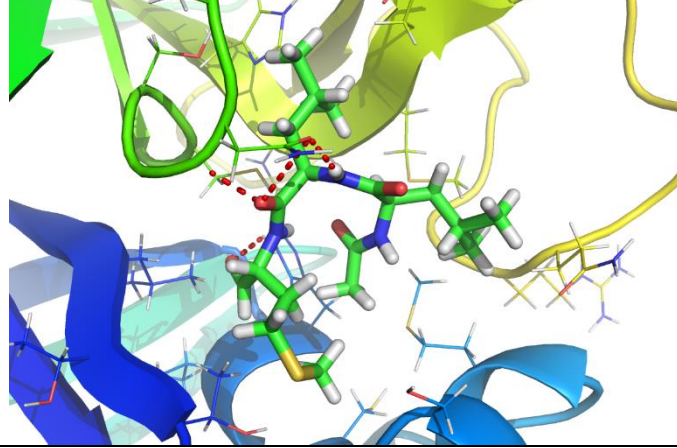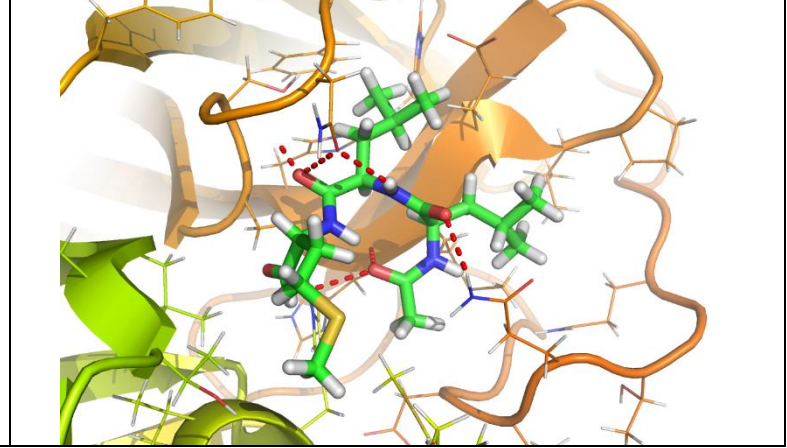



Calpain inhibitor XII

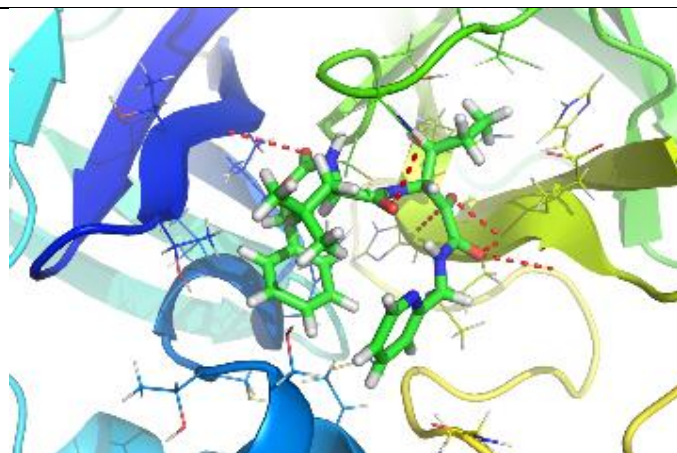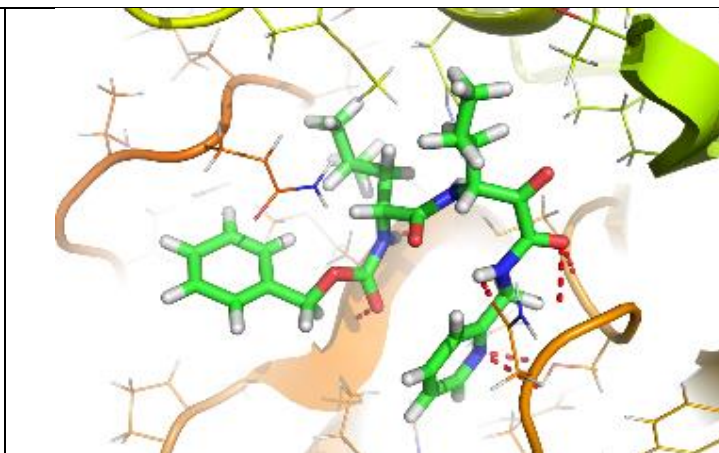

Calpeptin

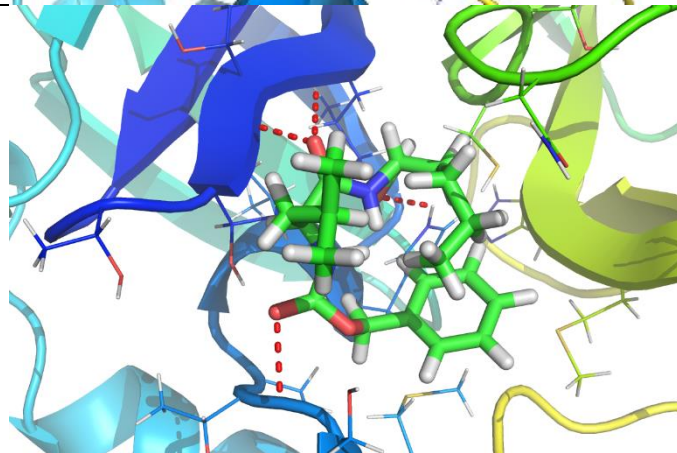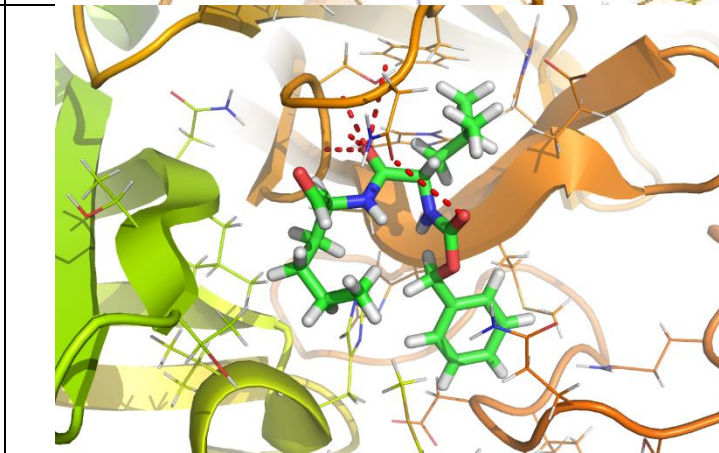

Candesartan cilexetil

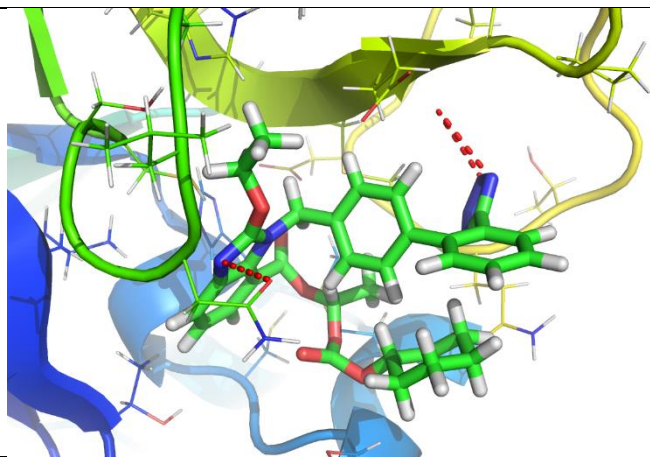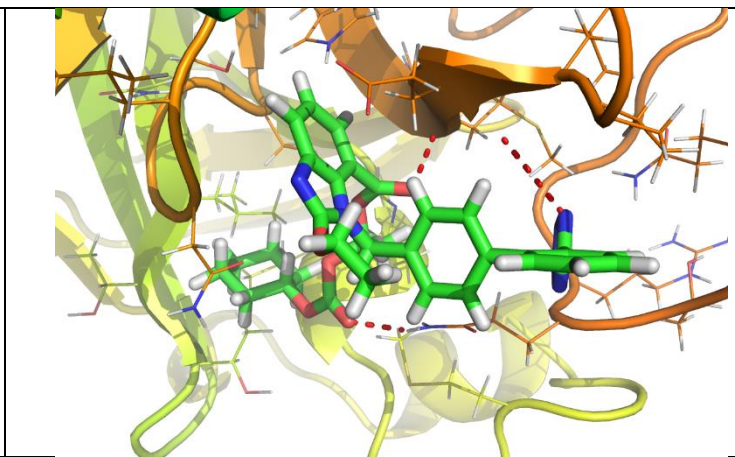

Carmofur

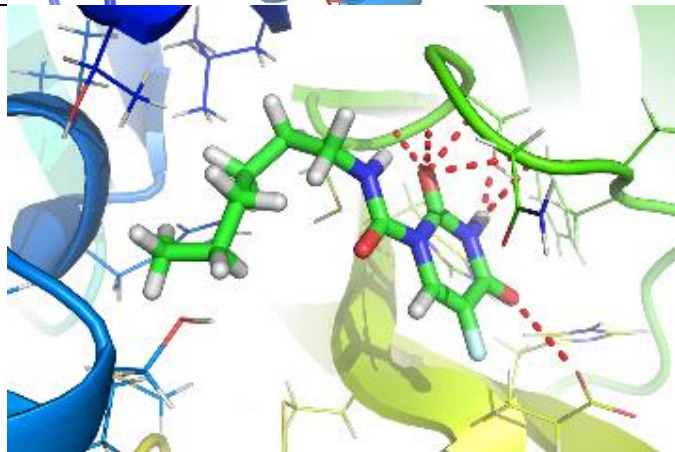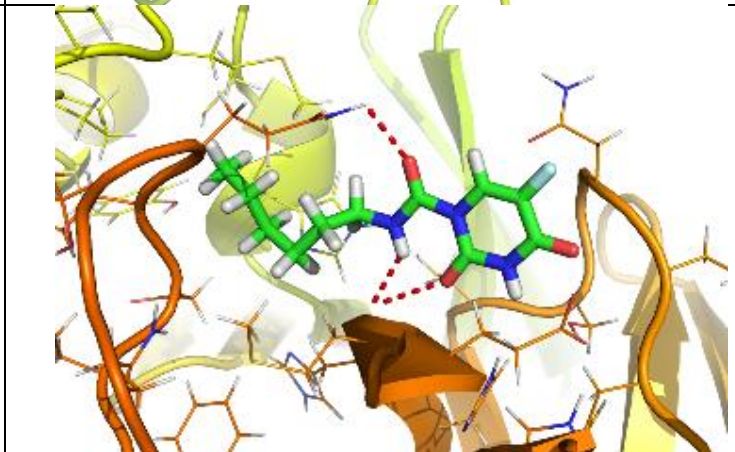



Chloroquine

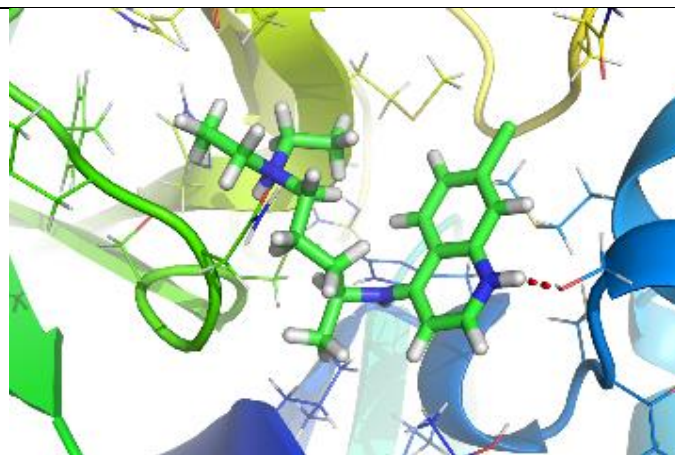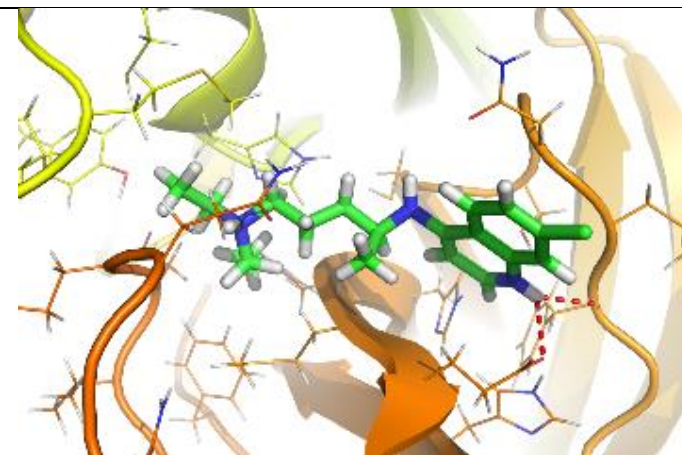

Dipyridamole

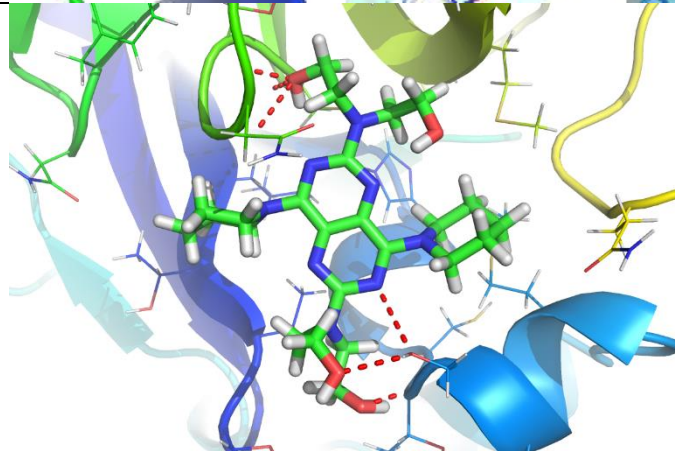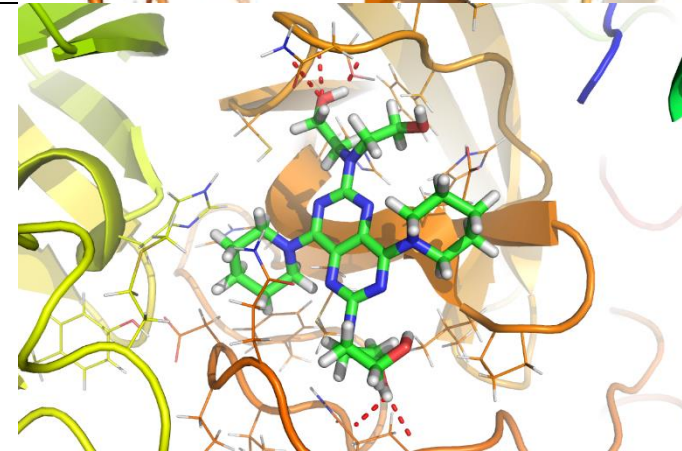



Disulfiram

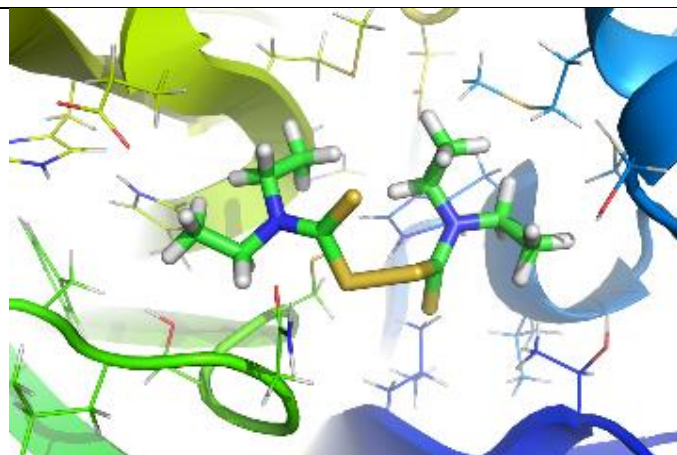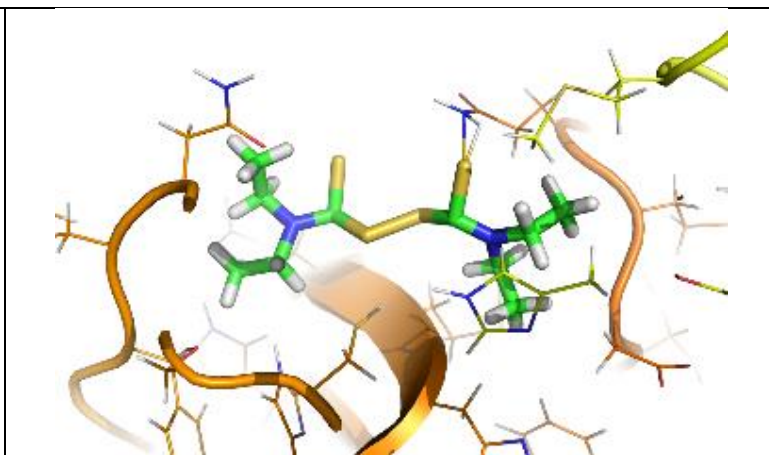

GC-373

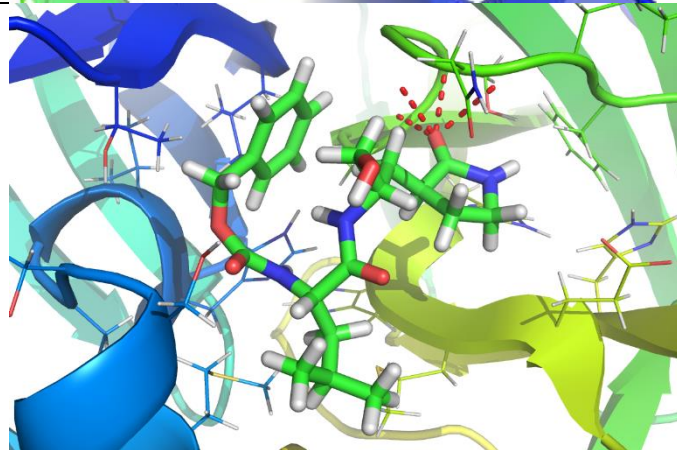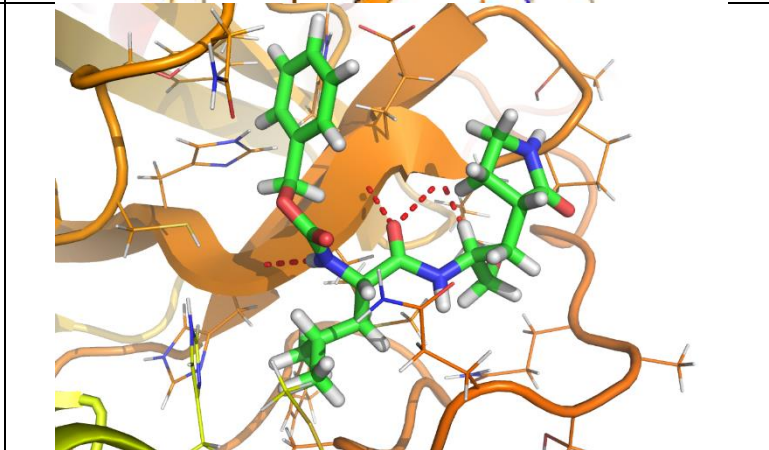

Hydroxychloroquine

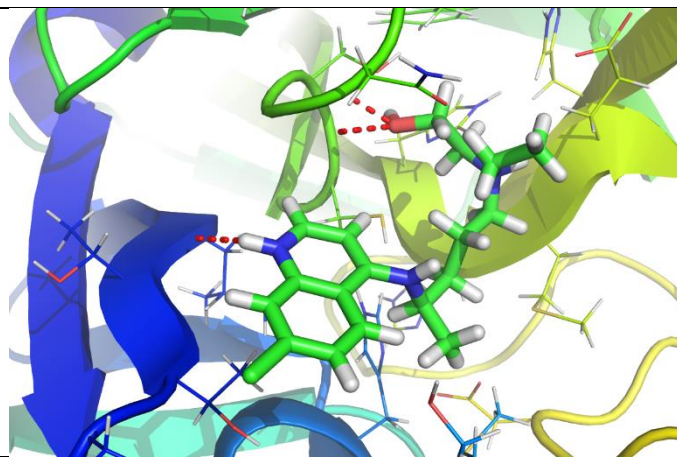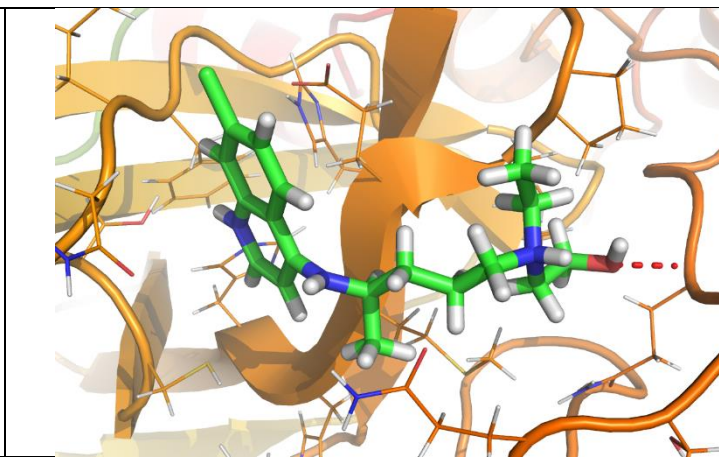

MG-115

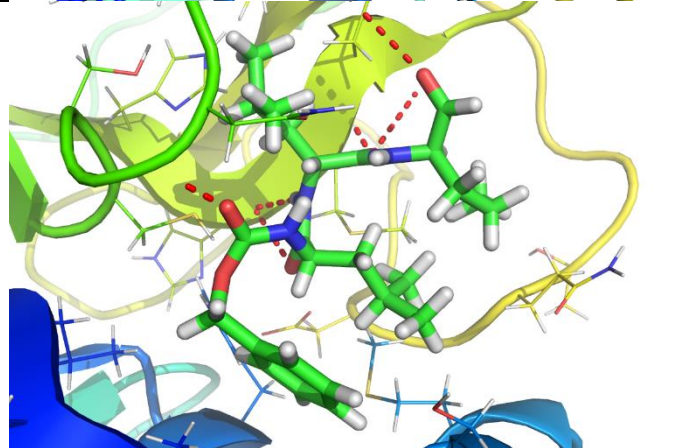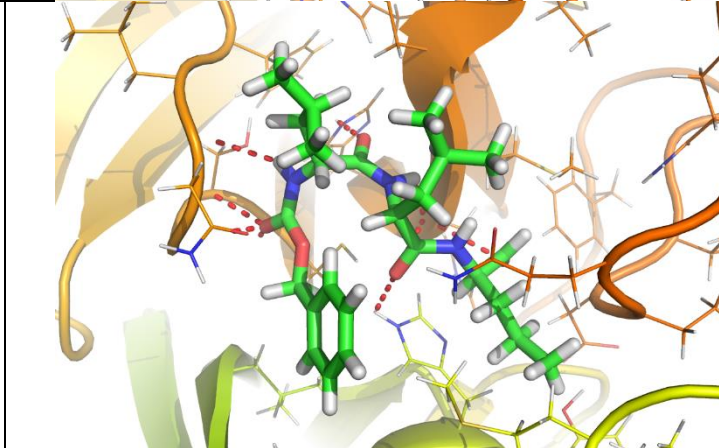



MG-132

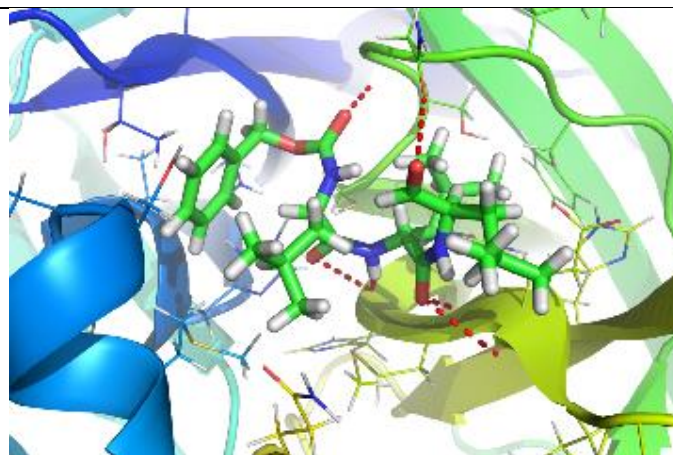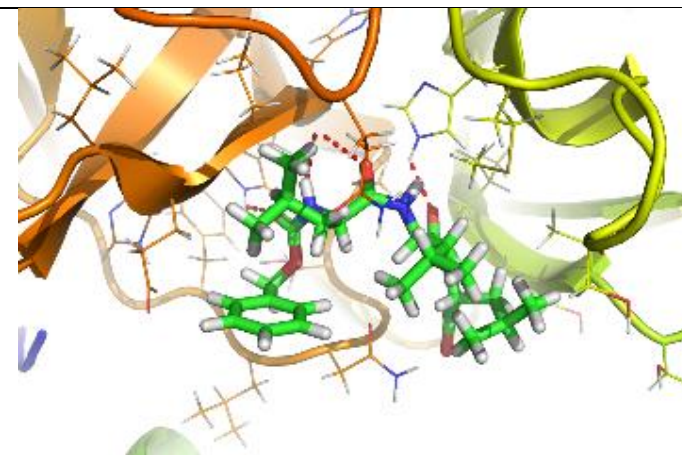

Narlaprevir

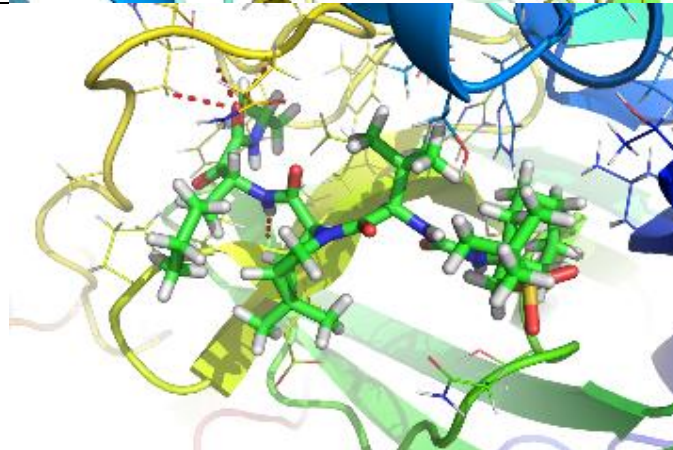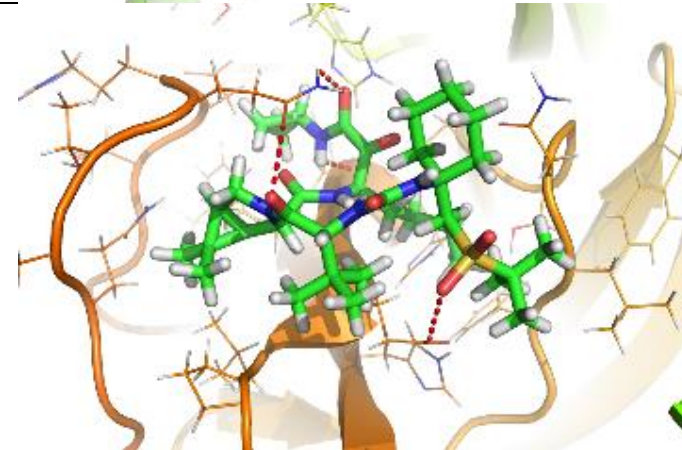



Omeprazole

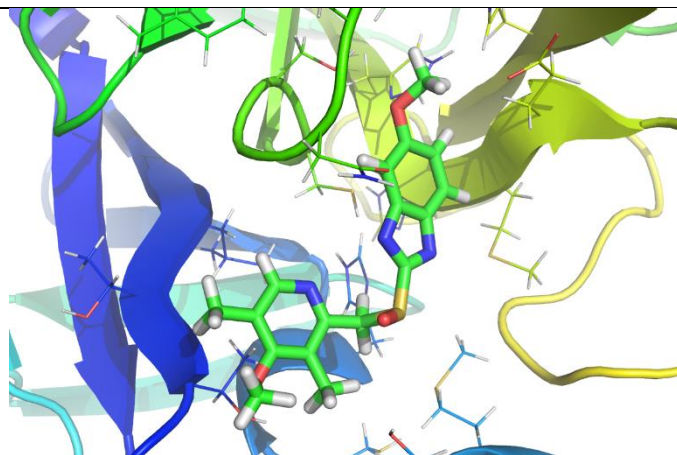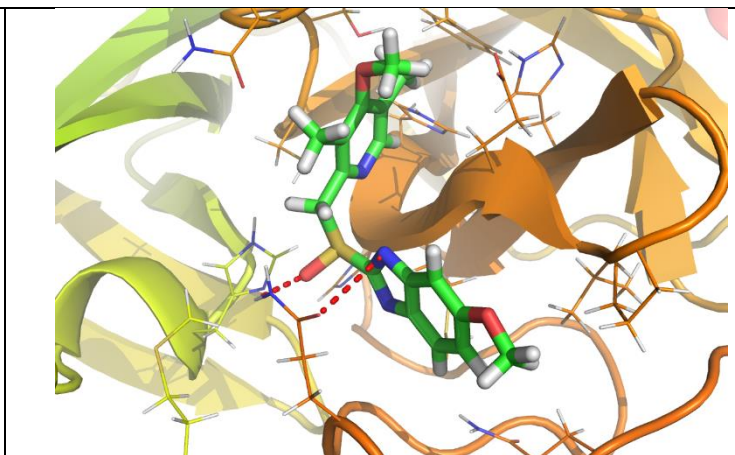

Oxytetracycline

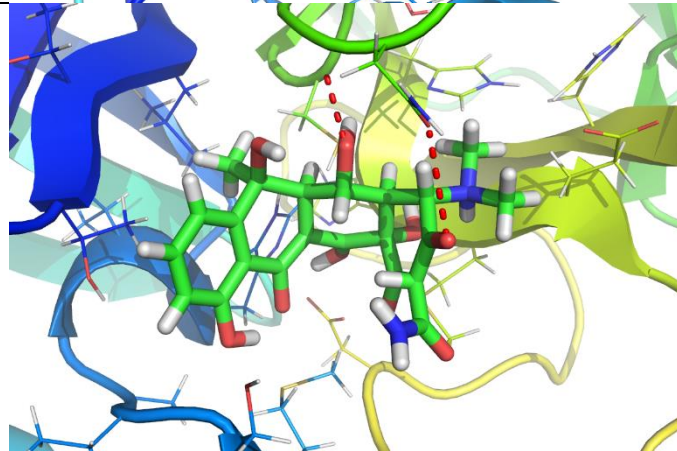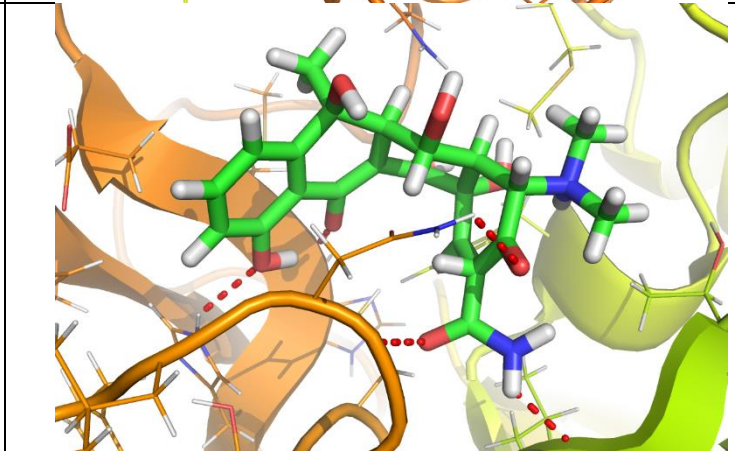

PX-12

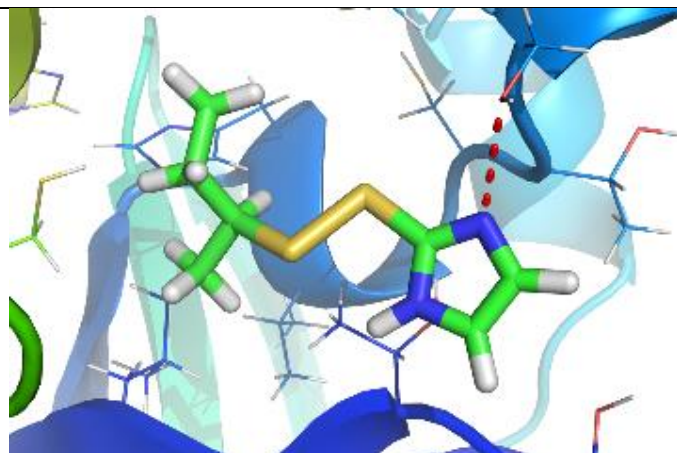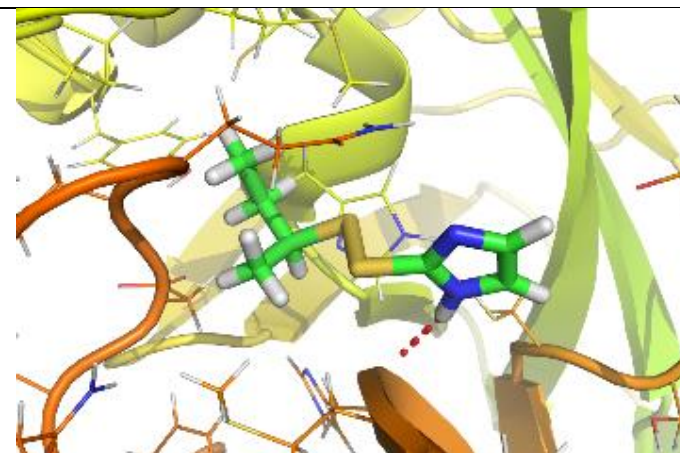

Shikonin

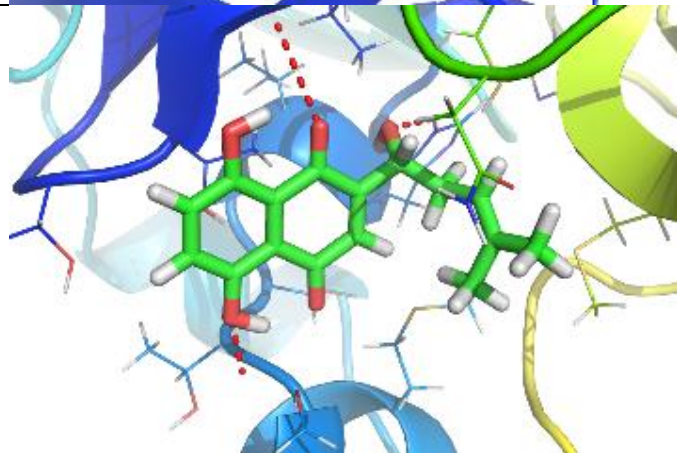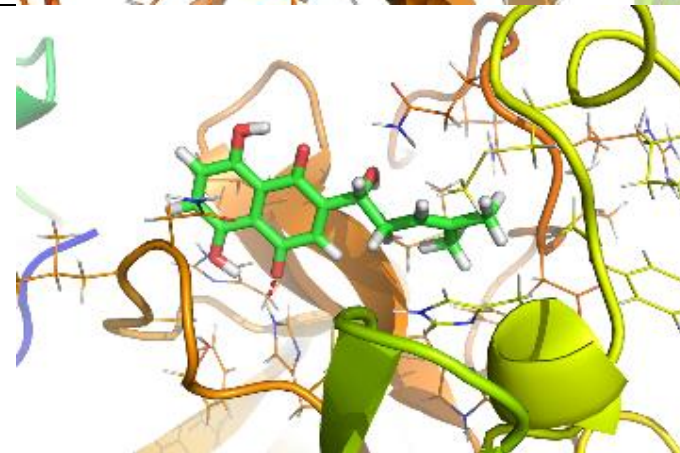

**Table S2.** The Pulling Force in Time Evolution.

| Name       | Monomer                                                                                                                                                                                                                                                                                                                                                                                                                                                        | Dimer                                                                                                                                                                                                                                                                                                                                                                                                                                                            |
|------------|----------------------------------------------------------------------------------------------------------------------------------------------------------------------------------------------------------------------------------------------------------------------------------------------------------------------------------------------------------------------------------------------------------------------------------------------------------------|------------------------------------------------------------------------------------------------------------------------------------------------------------------------------------------------------------------------------------------------------------------------------------------------------------------------------------------------------------------------------------------------------------------------------------------------------------------|
| <b>7J</b>  | 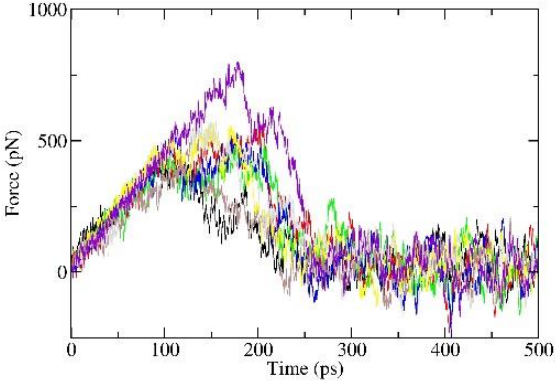 <p>A line graph showing Force (pN) on the y-axis (0 to 1000) versus Time (ps) on the x-axis (0 to 500). Multiple colored lines represent individual pulling force traces. The force increases from 0 at 0 ps to a peak of approximately 750 pN at 180 ps, then drops to a secondary peak of about 200 pN at 300 ps, and finally fluctuates around 100 pN until 500 ps.</p>  |  <p>A line graph showing Force (pN) on the y-axis (0 to 1000) versus Time (ps) on the x-axis (0 to 500). Multiple colored lines represent individual pulling force traces. The force increases from 0 at 0 ps to a peak of approximately 650 pN at 180 ps, then drops to a secondary peak of about 150 pN at 300 ps, and finally fluctuates around 100 pN until 500 ps.</p>   |
| <b>11a</b> |  <p>A line graph showing Force (pN) on the y-axis (0 to 1000) versus Time (ps) on the x-axis (0 to 500). Multiple colored lines represent individual pulling force traces. The force increases from 0 at 0 ps to a peak of approximately 850 pN at 180 ps, then drops to a secondary peak of about 150 pN at 300 ps, and finally fluctuates around 100 pN until 500 ps.</p> |  <p>A line graph showing Force (pN) on the y-axis (0 to 1000) versus Time (ps) on the x-axis (0 to 500). Multiple colored lines represent individual pulling force traces. The force increases from 0 at 0 ps to a peak of approximately 1000 pN at 220 ps, then drops to a secondary peak of about 150 pN at 300 ps, and finally fluctuates around 100 pN until 500 ps.</p> |



**11b**

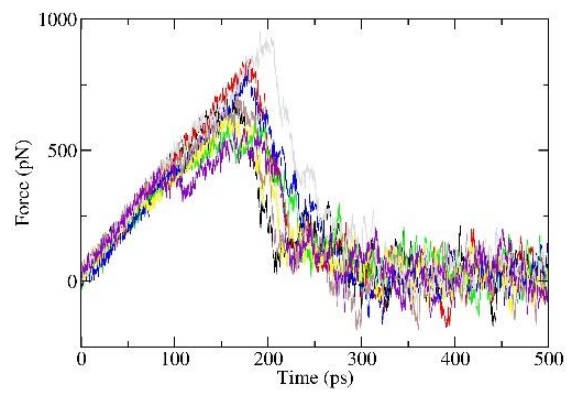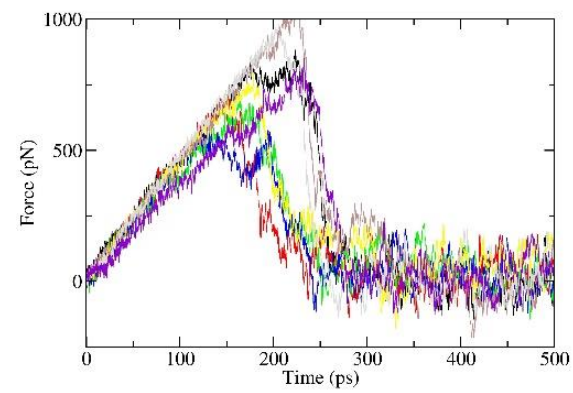

**11r**

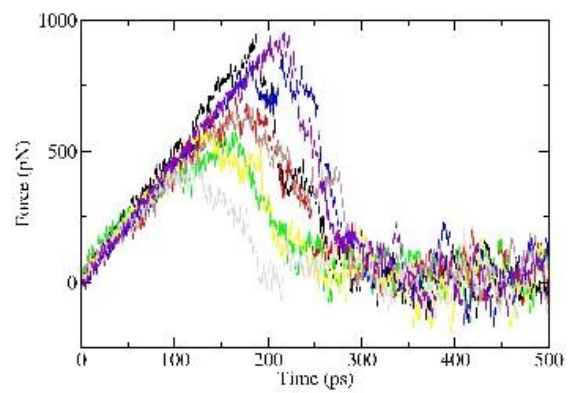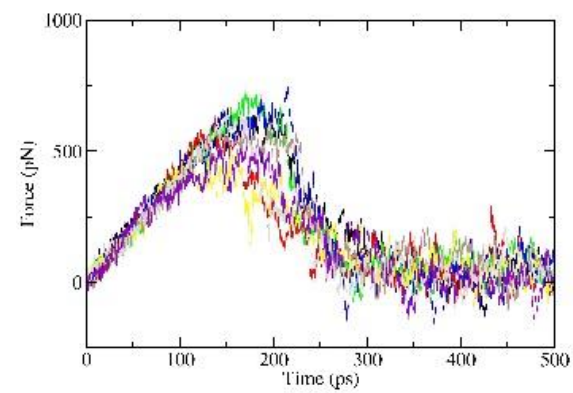

13a

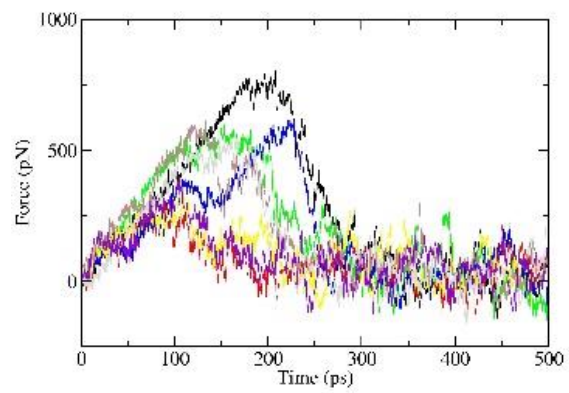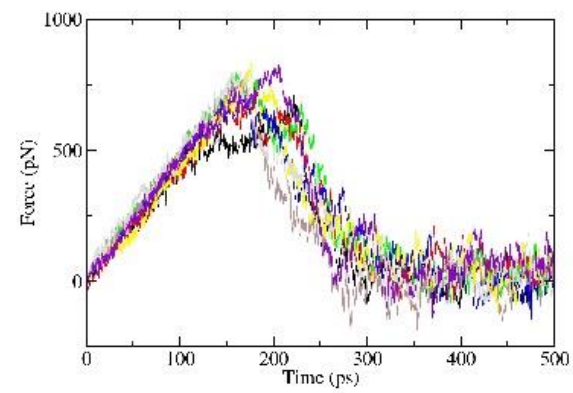

13b

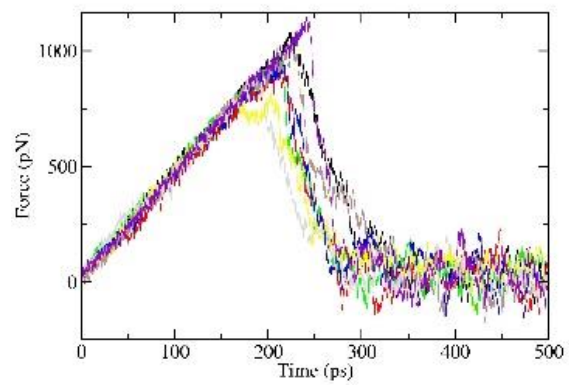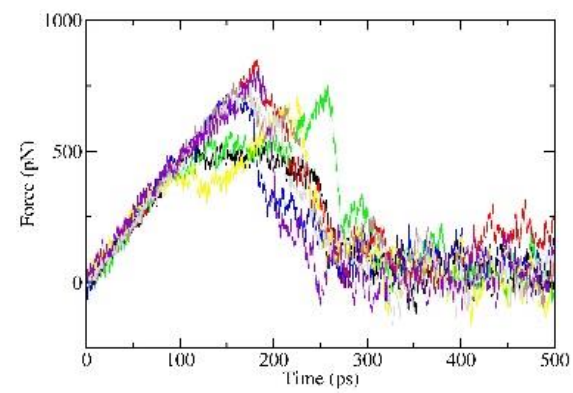

Calpain inhibitor I

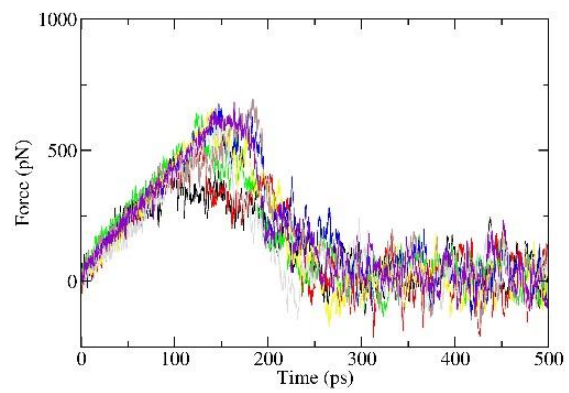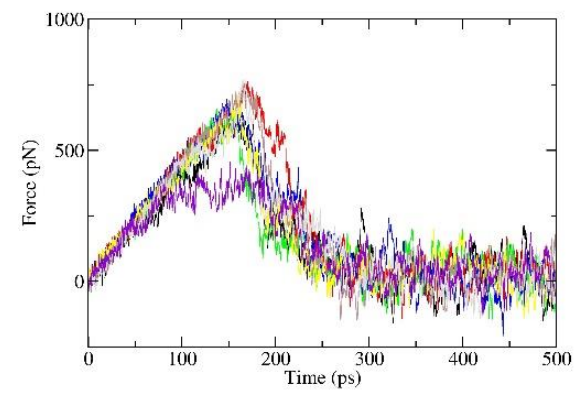

Calpain inhibitor II

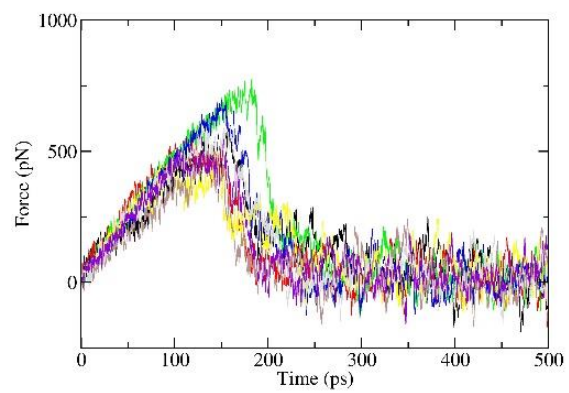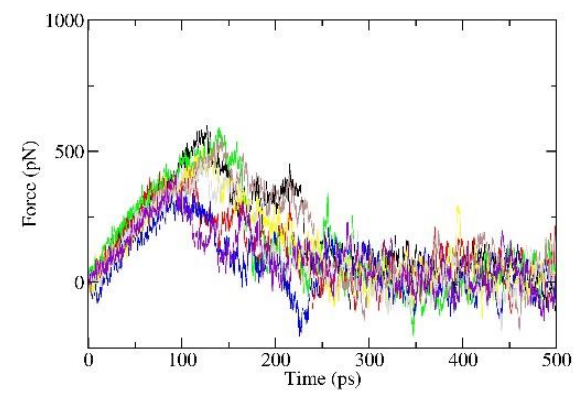



Calpain inhibitor  
XII

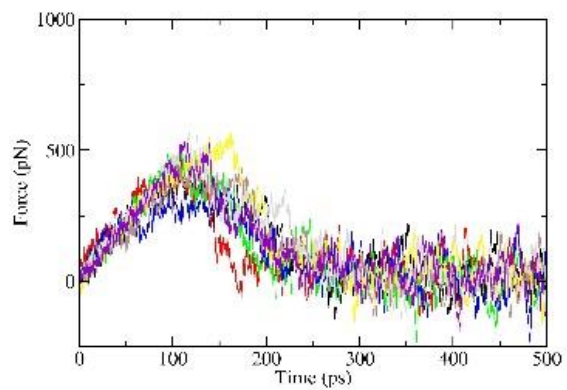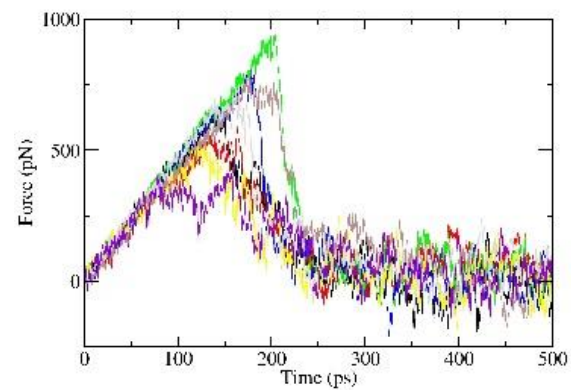

Calpeptin

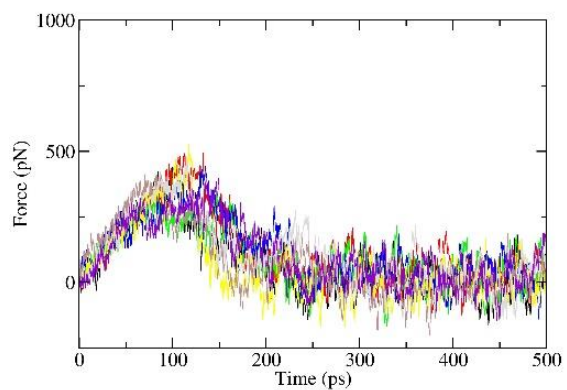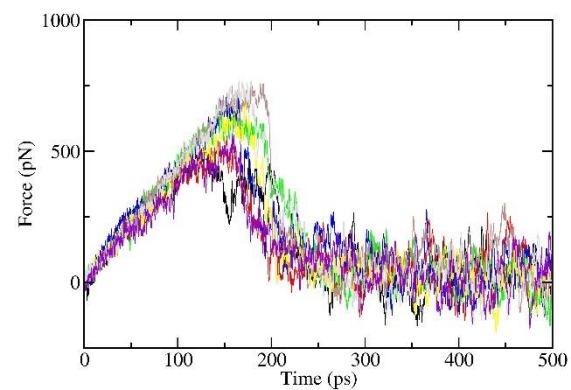

Candesartan  
cilexetil

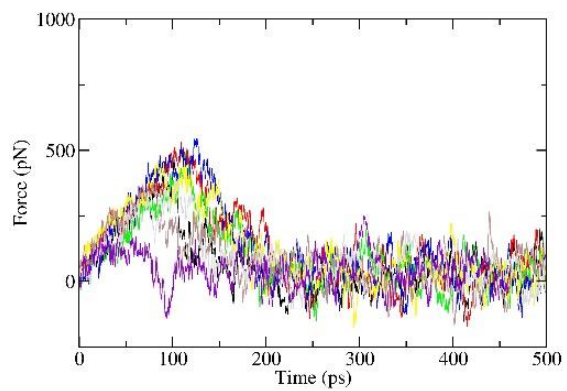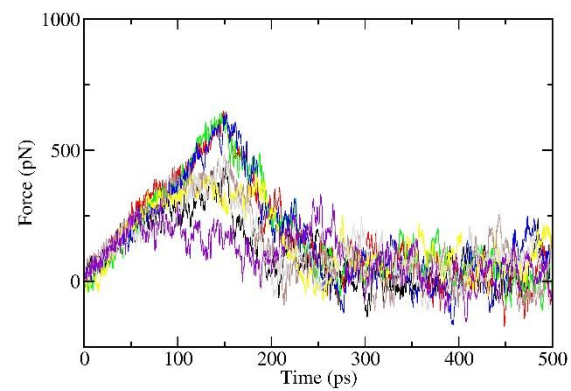

Carmofur

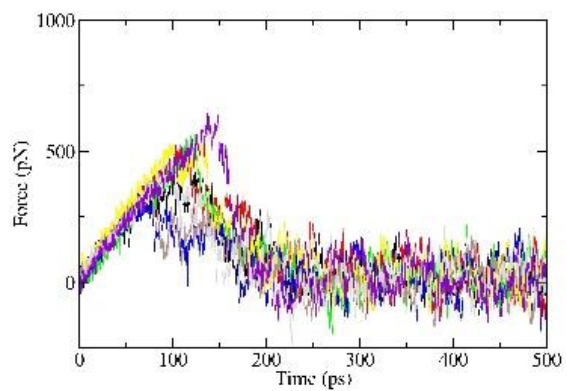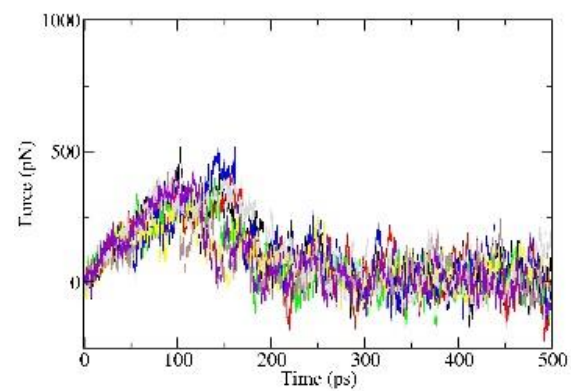

Chloroquine

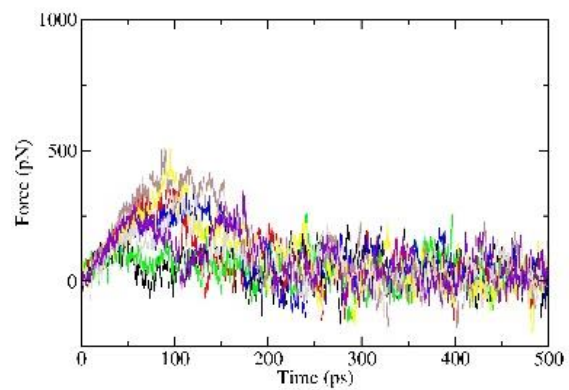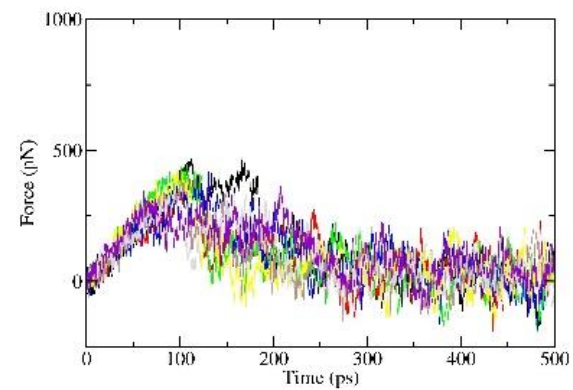

Dypyradimole

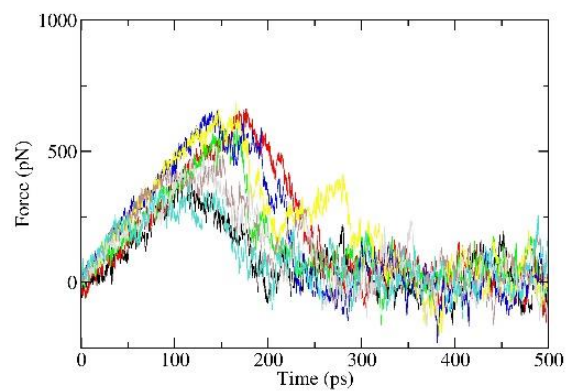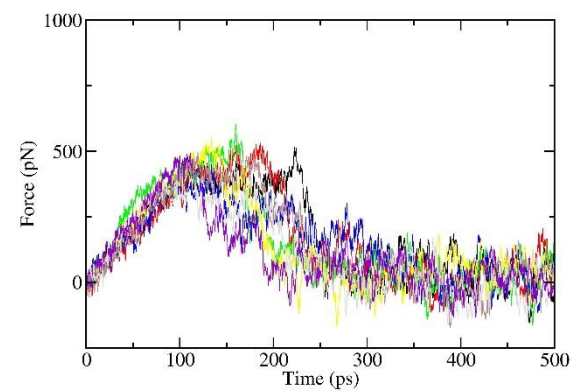



Disulfiram

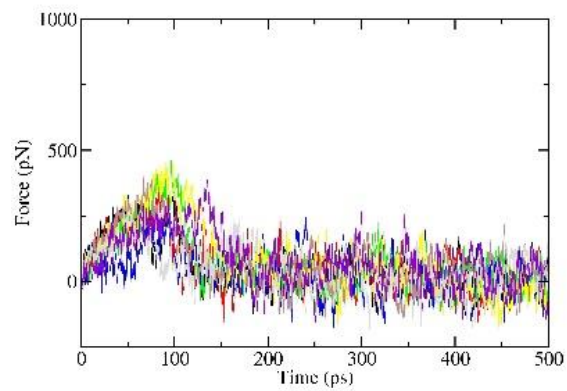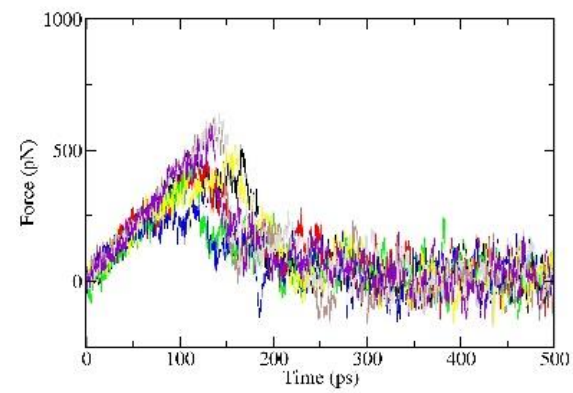

GC-373

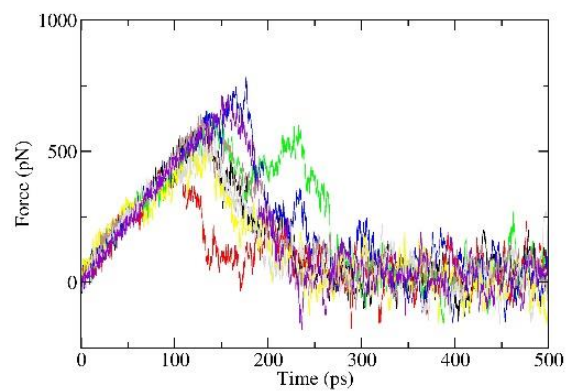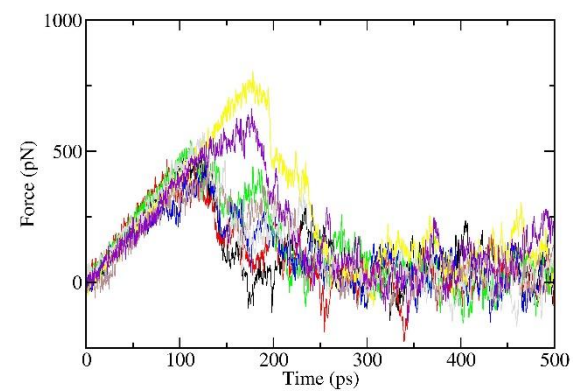

Hydroxychloroquine

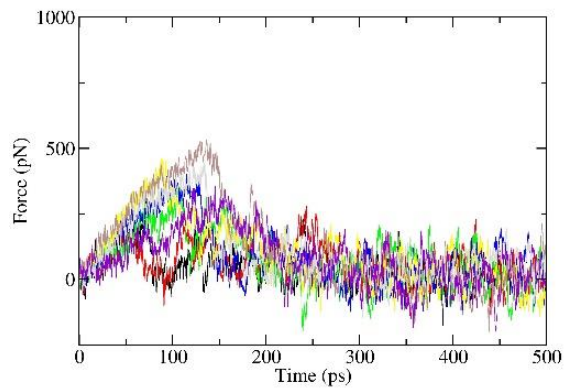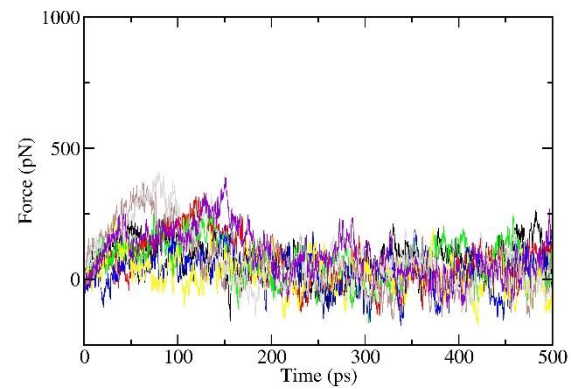

MG-115

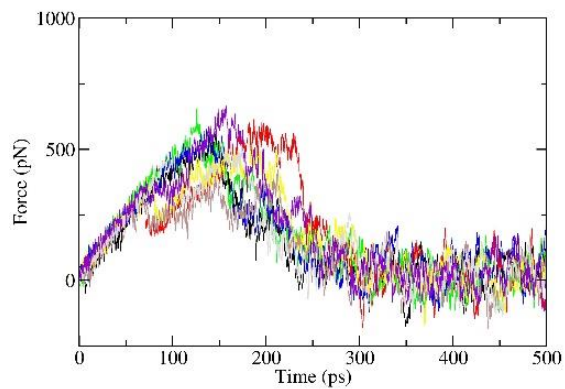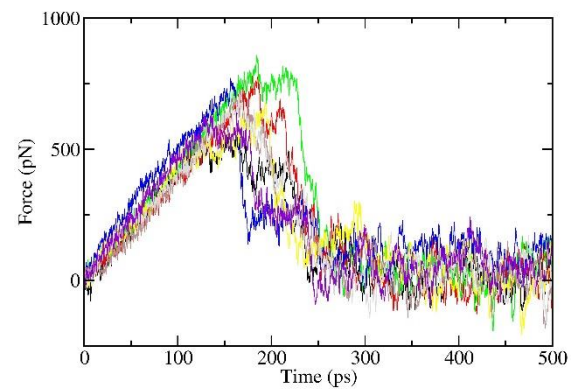

MG-132

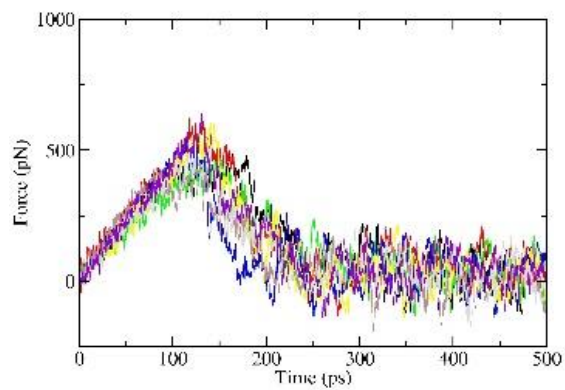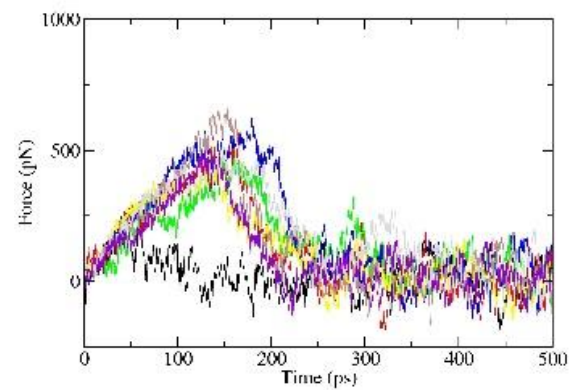

Narlaprevir

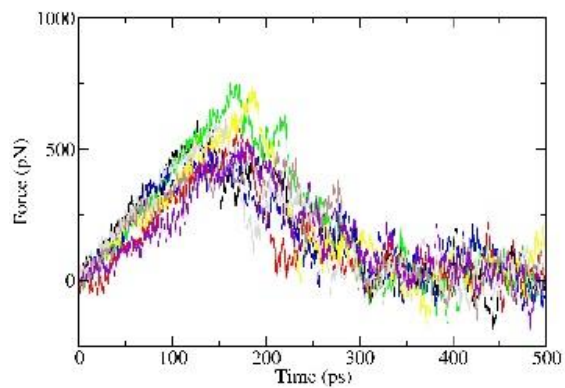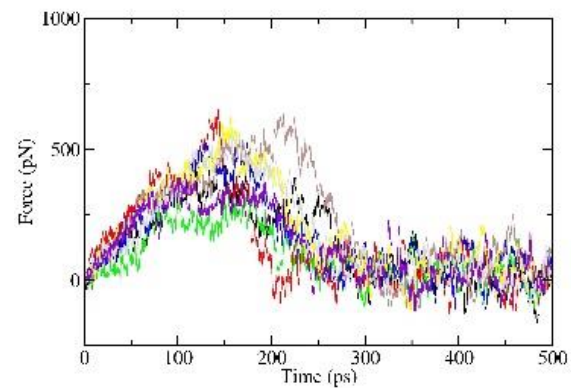



Omeprazole

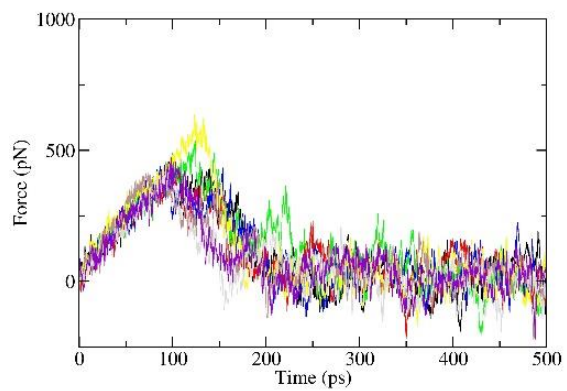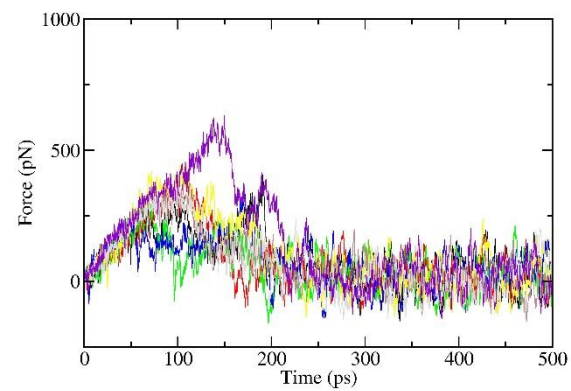

Oxytetracycline

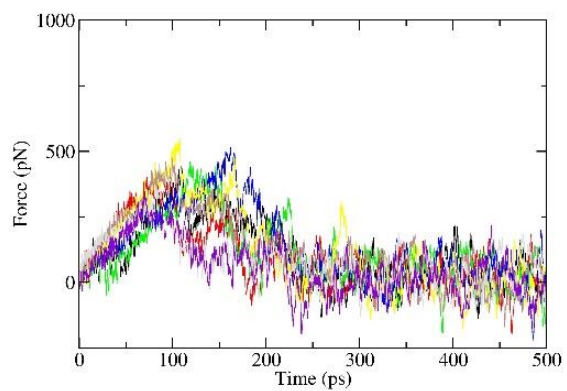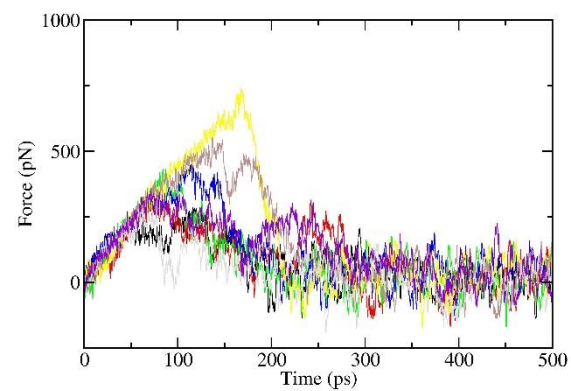

PX-12

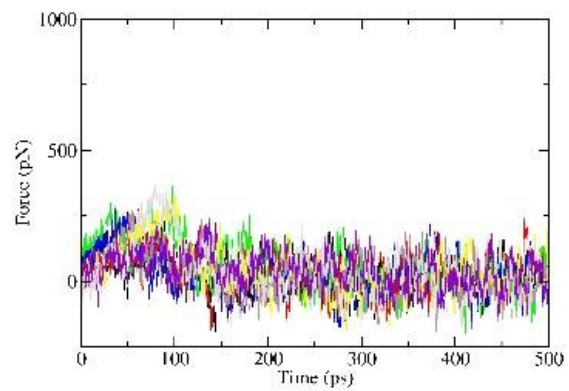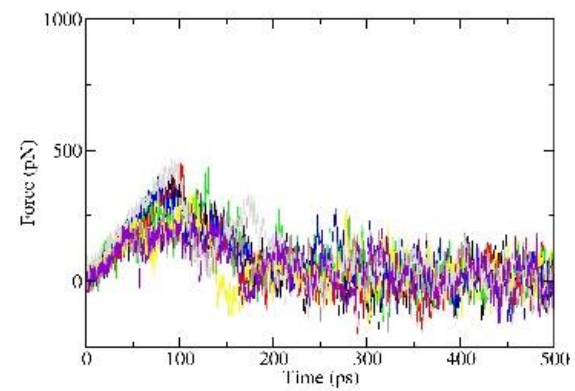

Shikonin

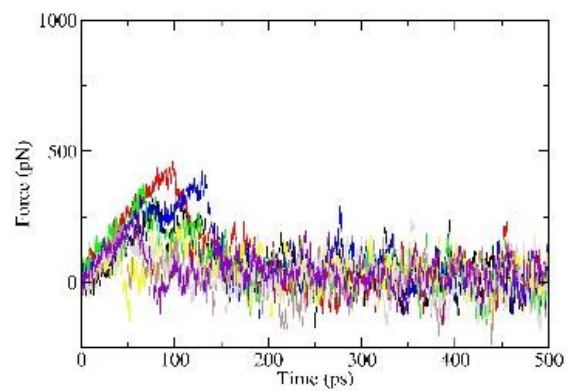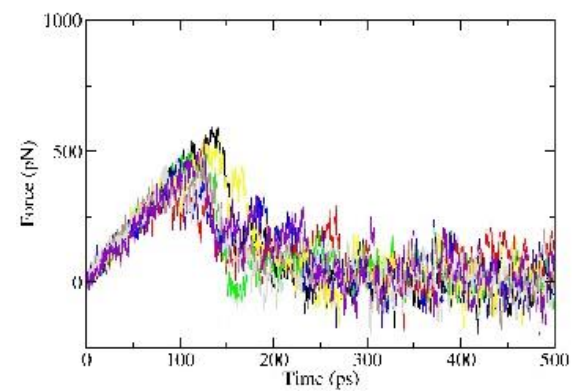

**Table S3.** The Pulling Work in Time Dependence over 8 Independent SMD Trajectories.

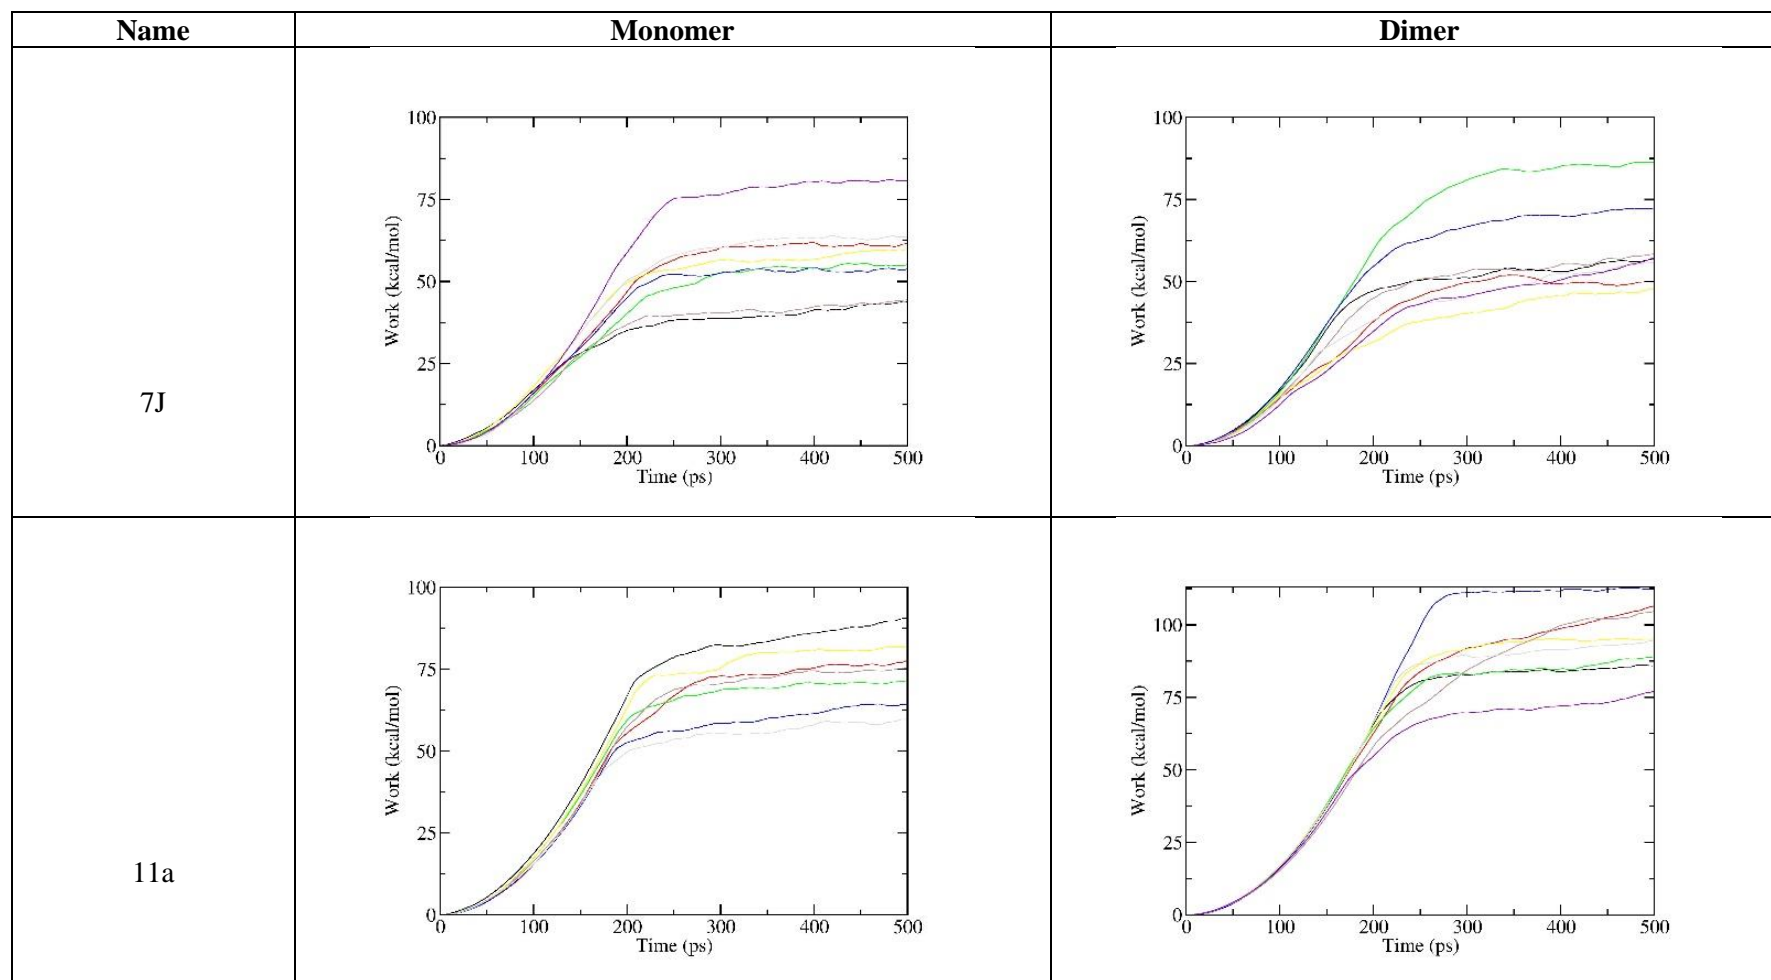

11b

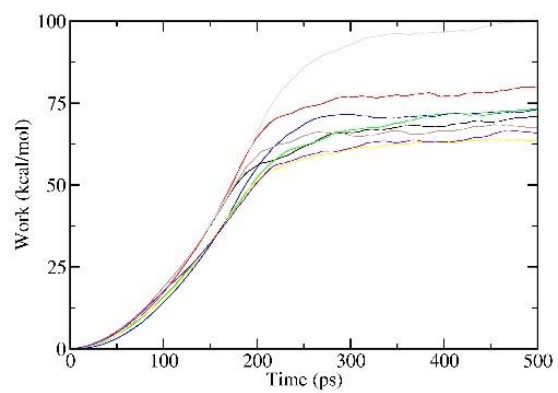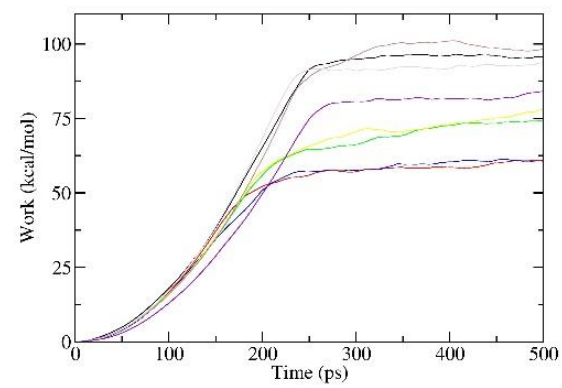

11r

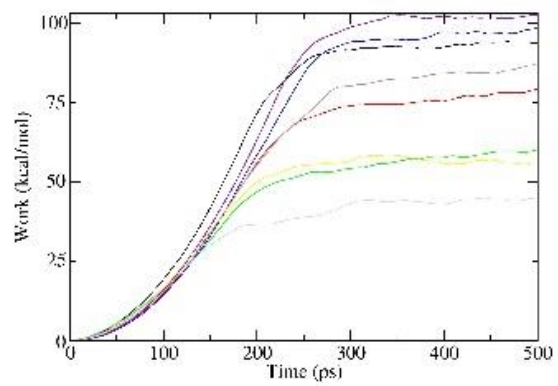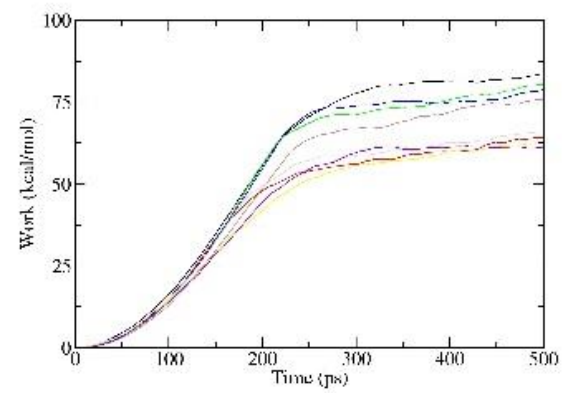



13a

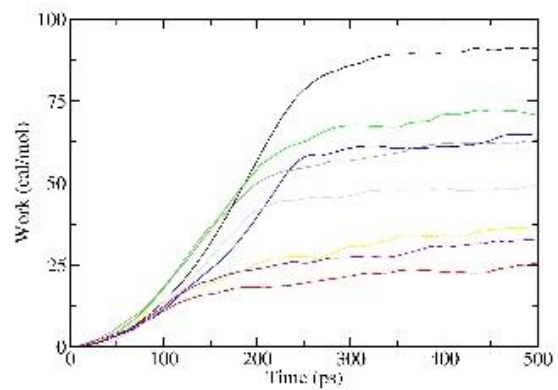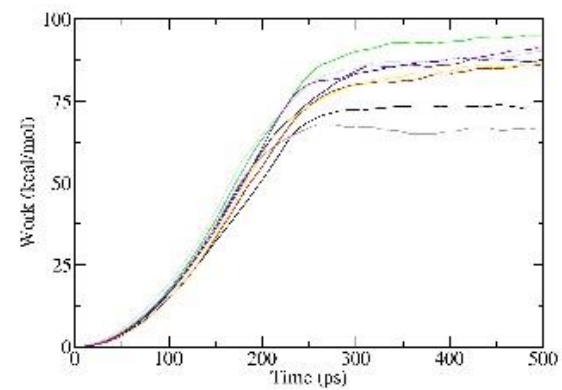

13b

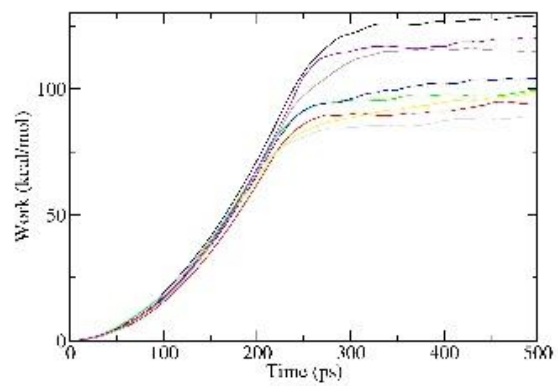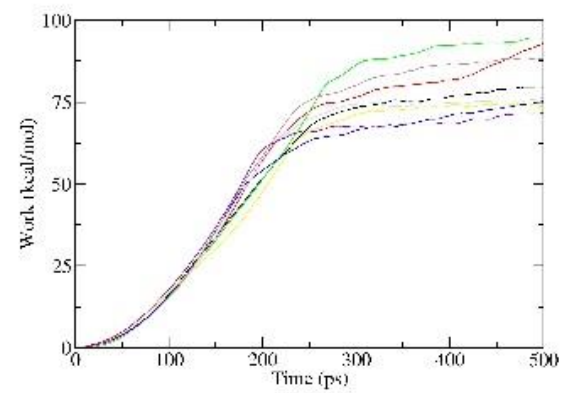

Calpain inhibitor I

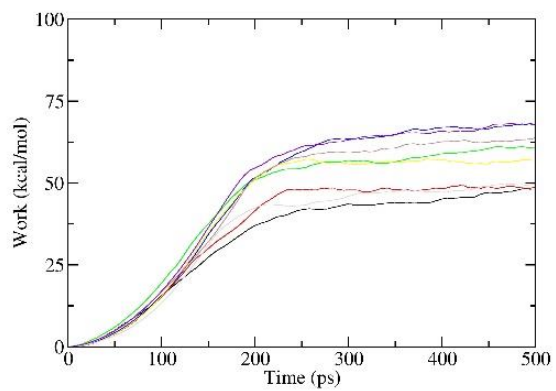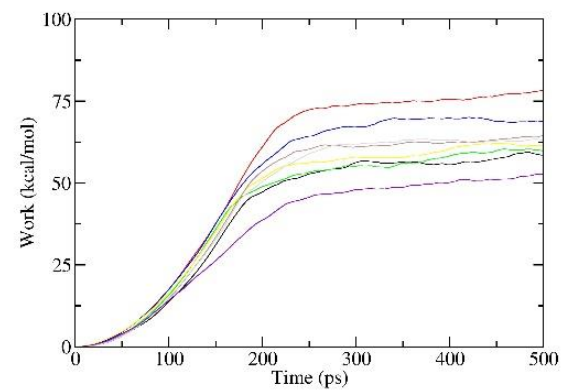

Calpain inhibitor II

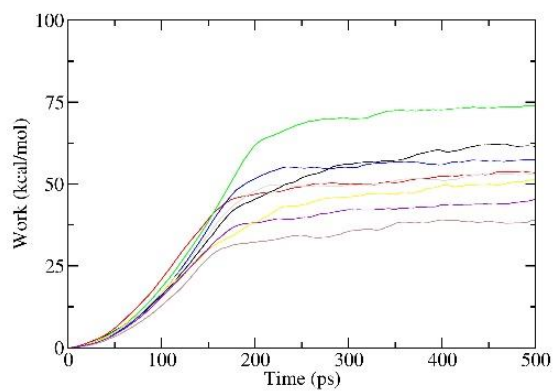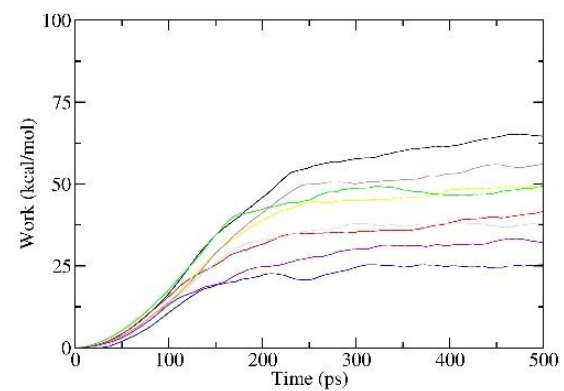

Calpain inhibitor XII

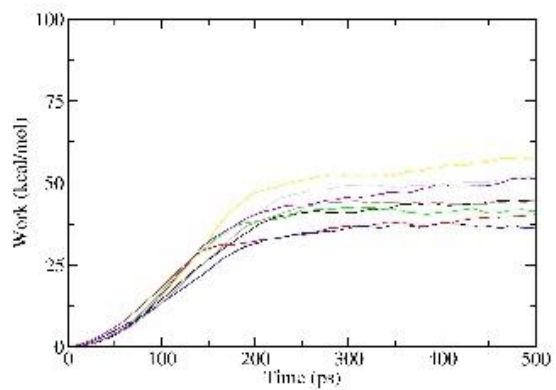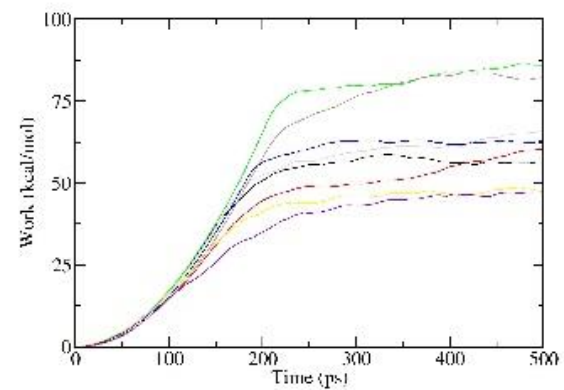

Calpeptin

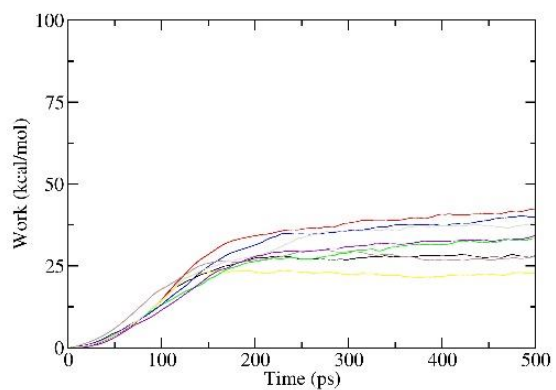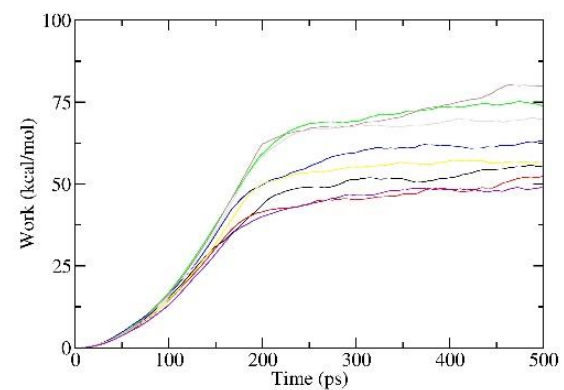

Candesartan cilexetil

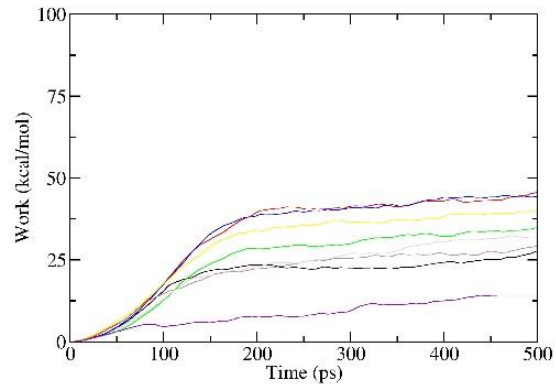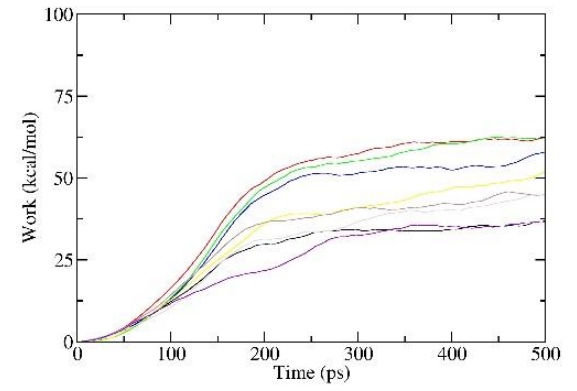

Carmofur

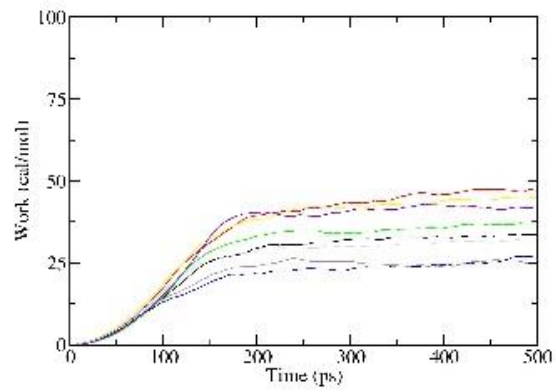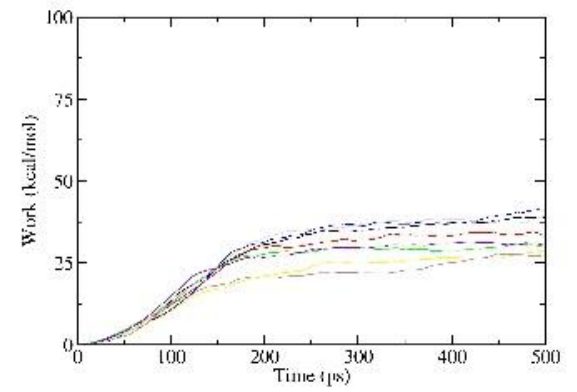



Chloroquine

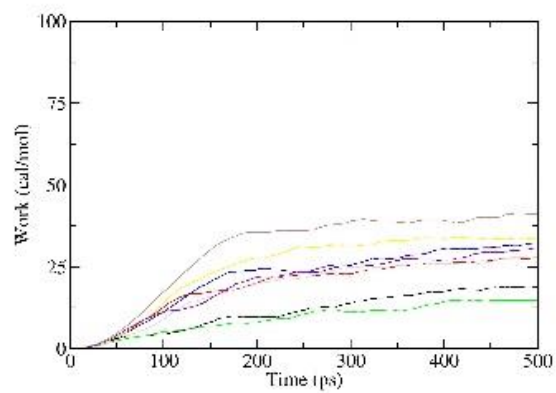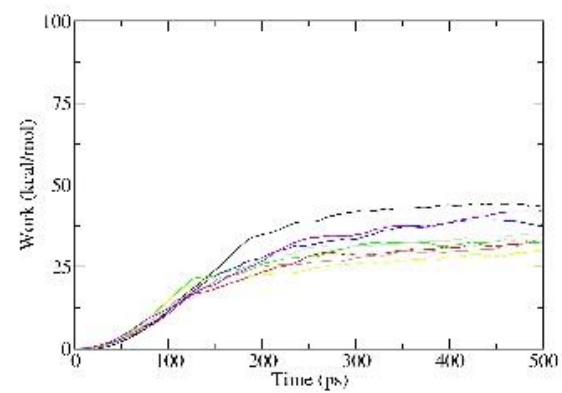

Dipyradimole

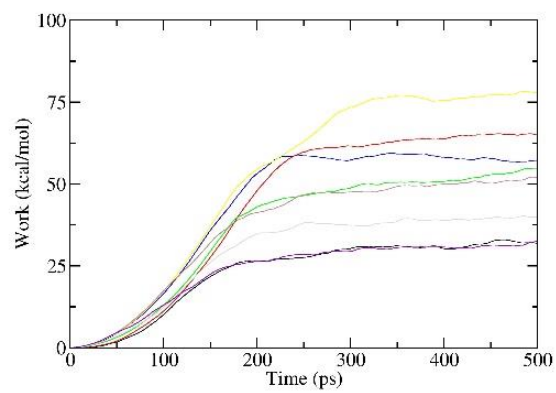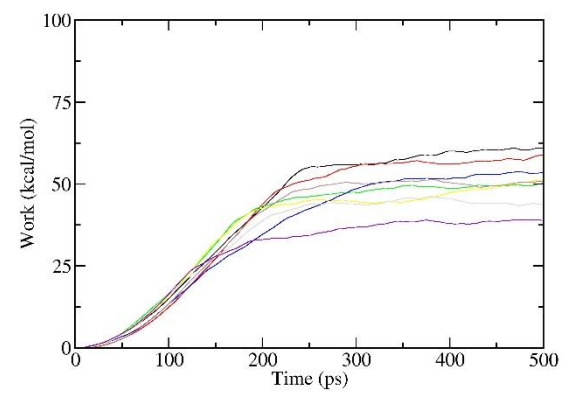

Disulfiram

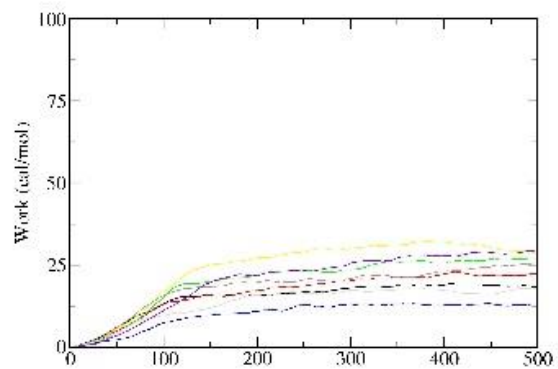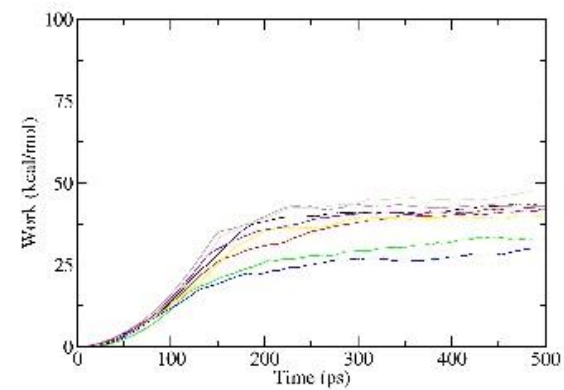

GC-373

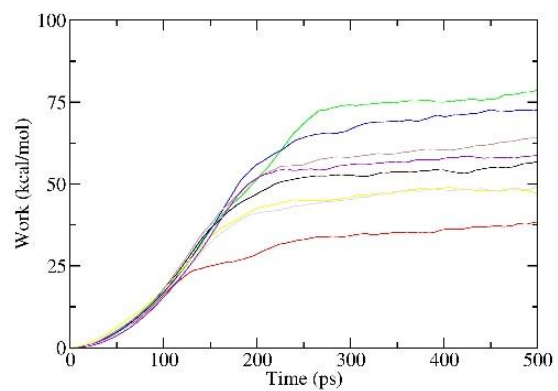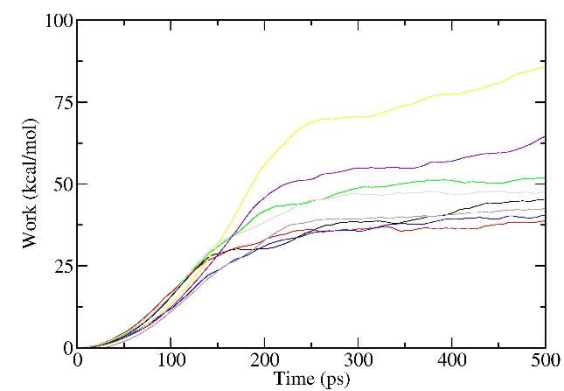

Hydroxychloroquine

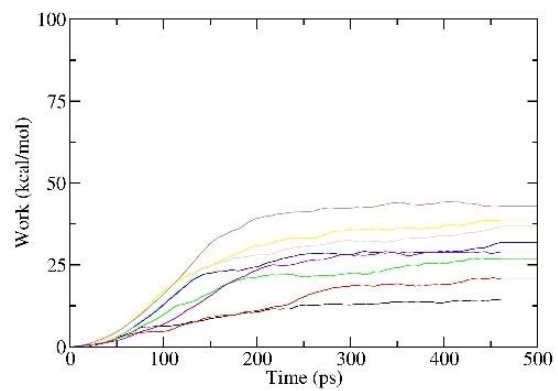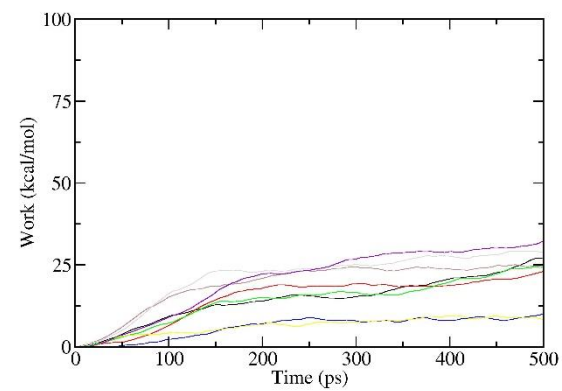

MG-115

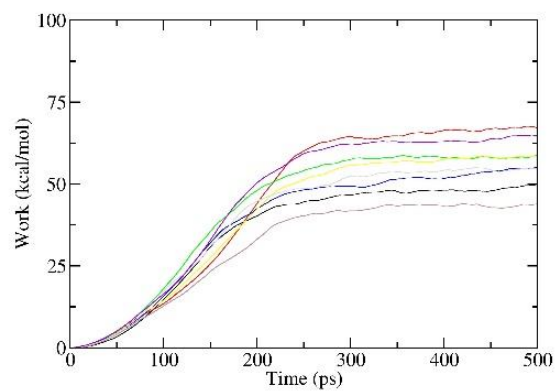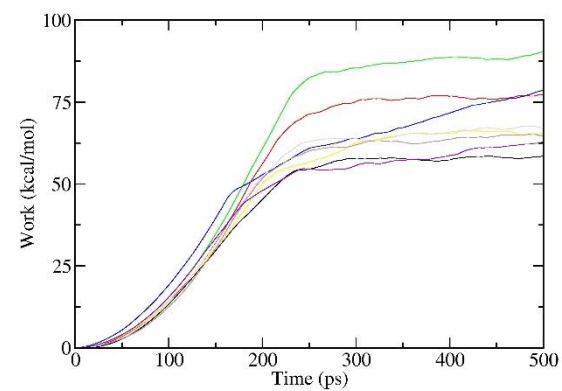

MG-132

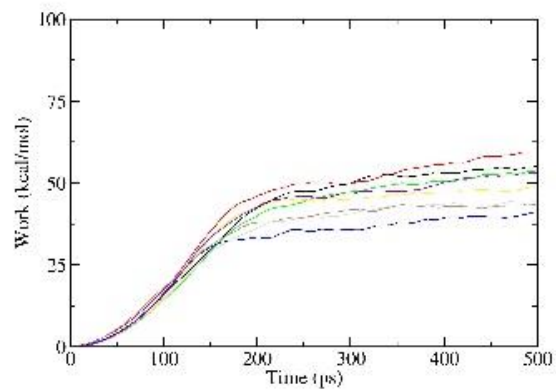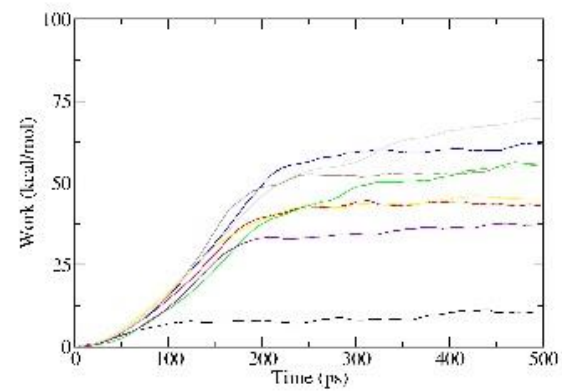

Narlaprevir

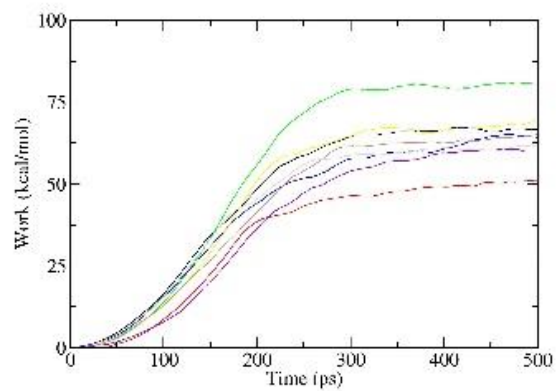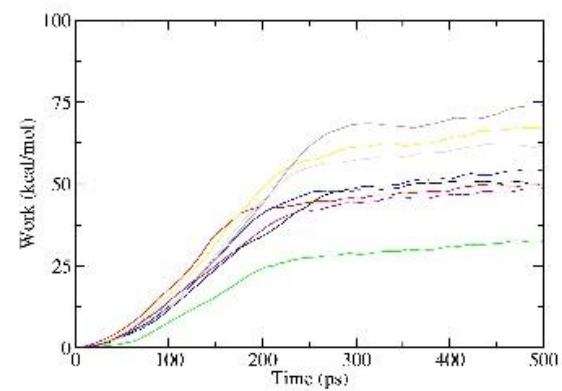



Omeprazole

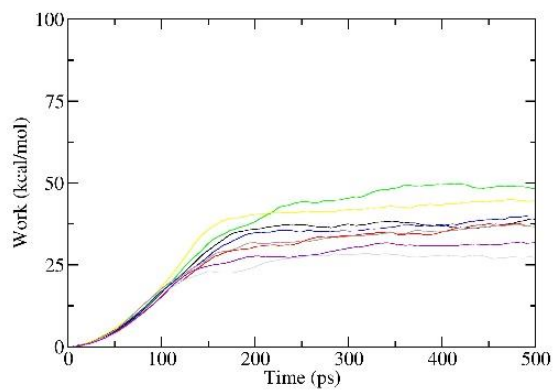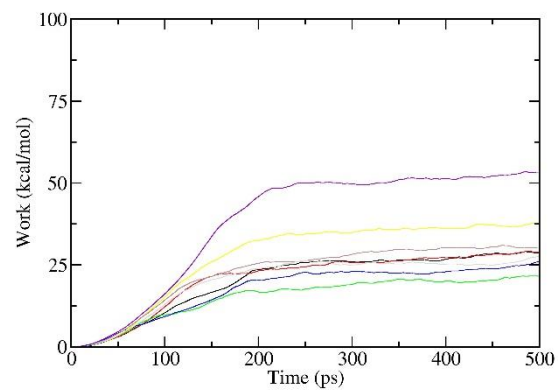

Oxytetracycline

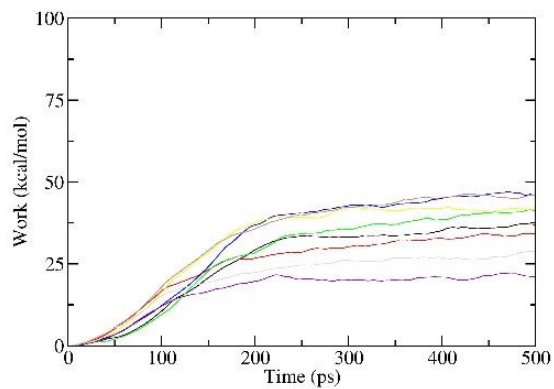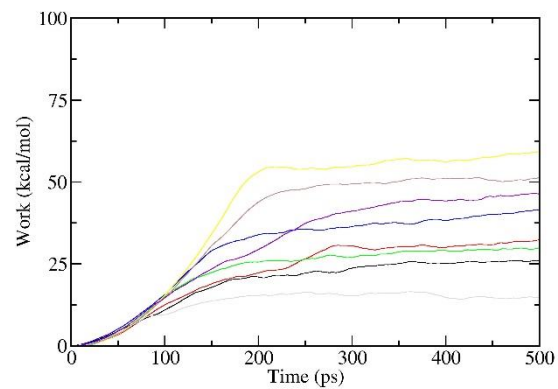

PX-12

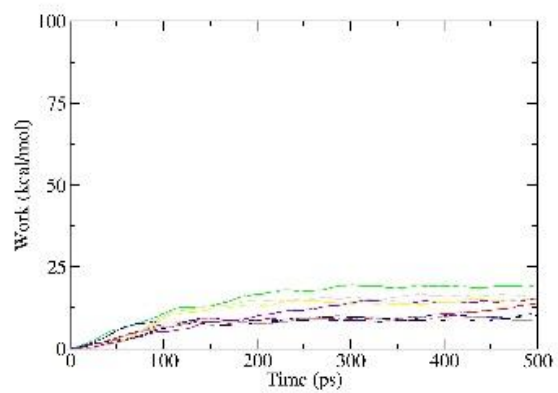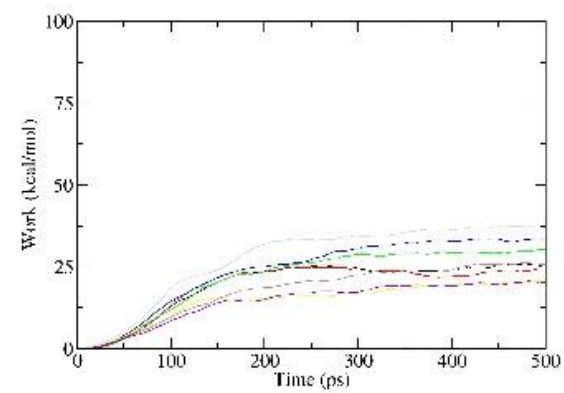

Shikonin

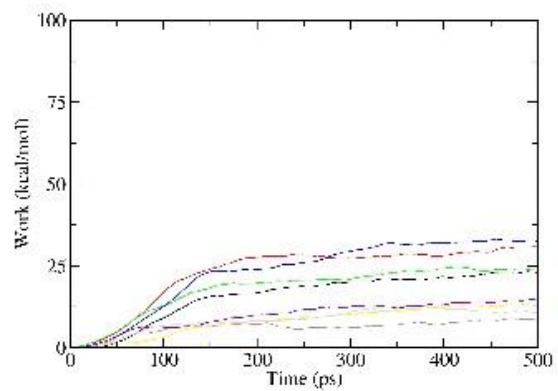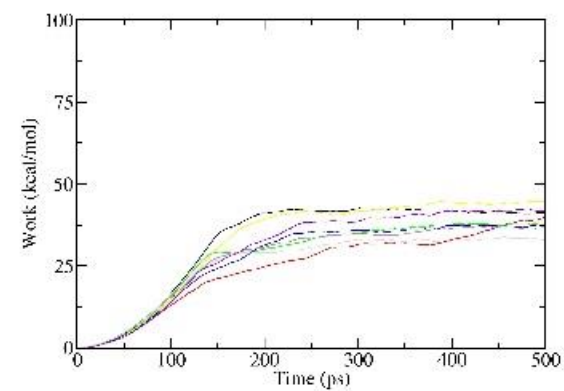

**Table S4.** Interaction diagram between inhibitors and SARS-CoV-2 Mpro via PLIP protocol.<sup>1</sup>

| Name | Monomer                                                                             | Dimer                                                                                |
|------|-------------------------------------------------------------------------------------|--------------------------------------------------------------------------------------|
| 7j   | 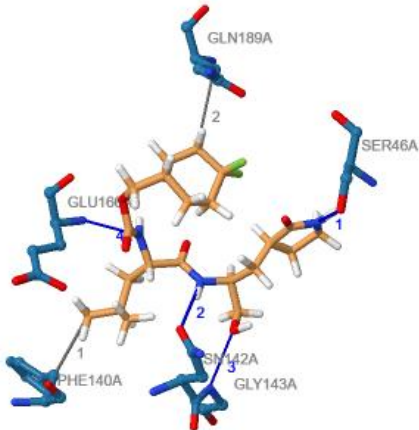  |   |
| 11a  |  |  |

11b

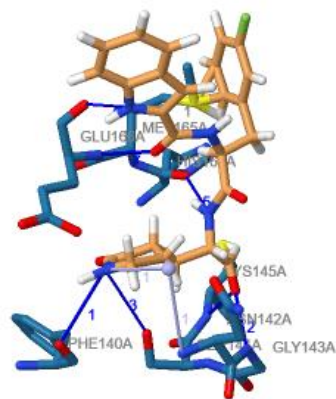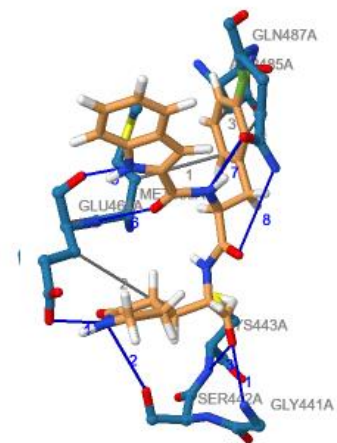

11r

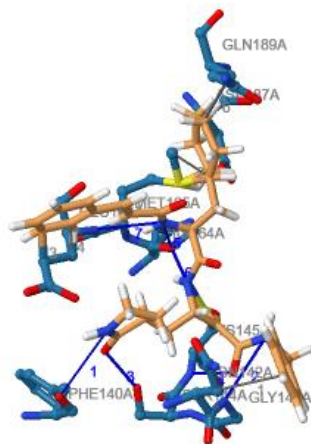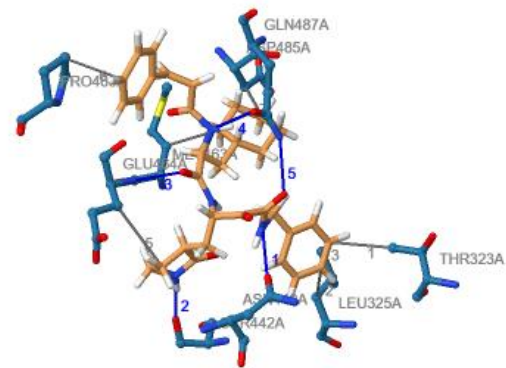



13a

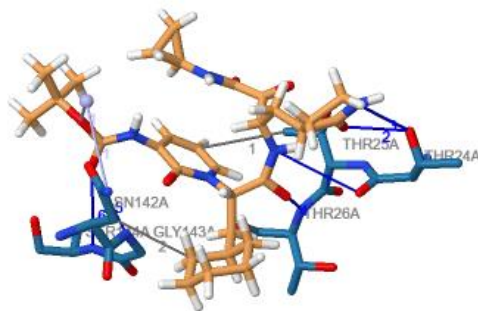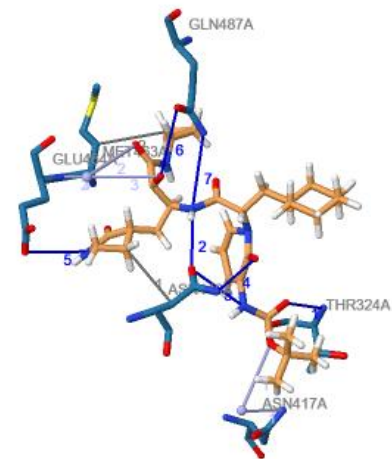

13b

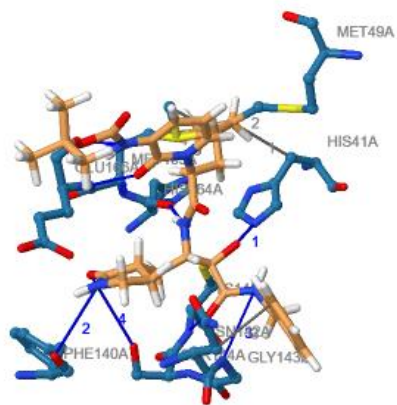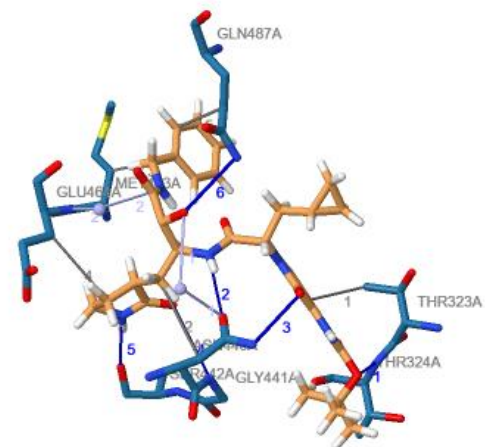

Calpain inhibitor I

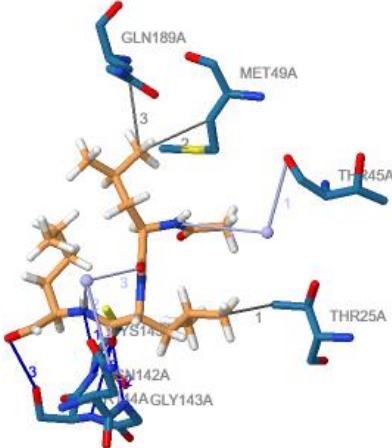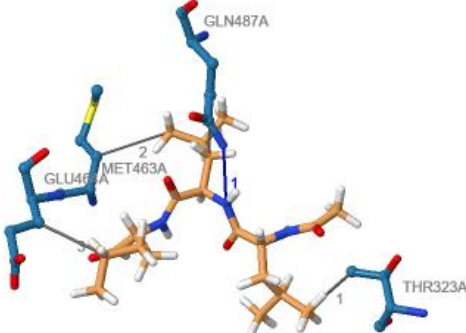

Calpain inhibitor II

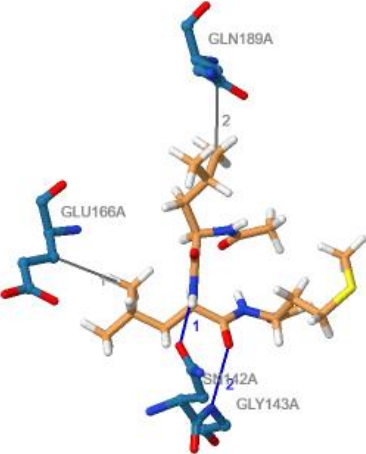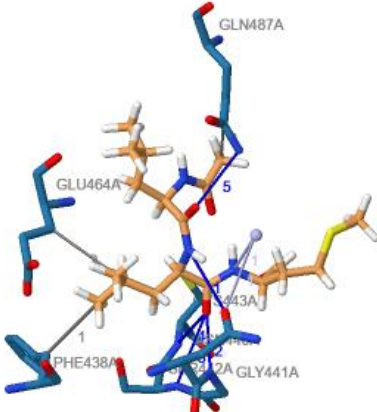

Calpain inhibitor XII

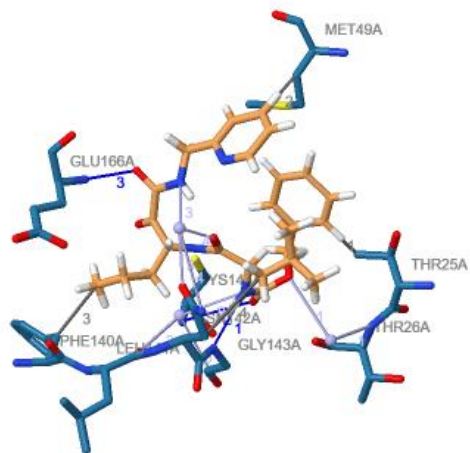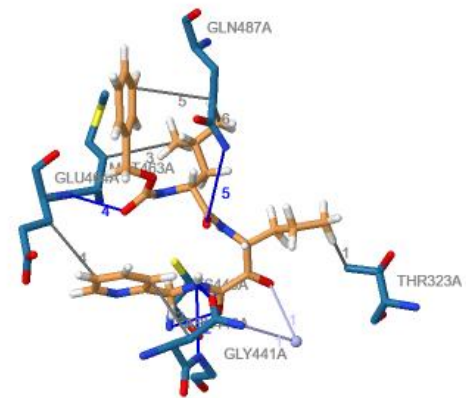

Calpeptin

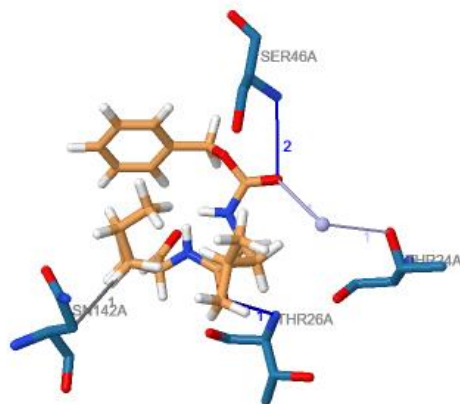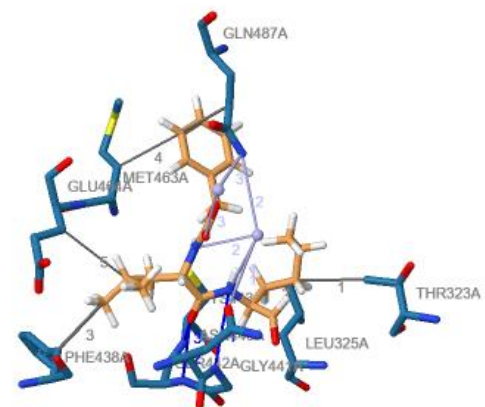

Candesartan cilexetil

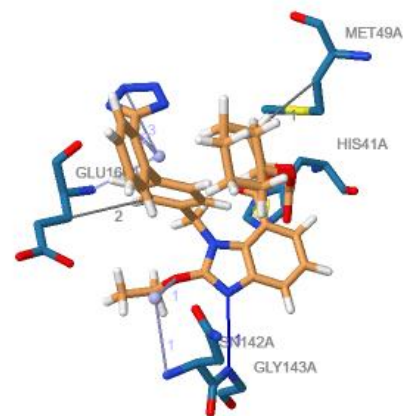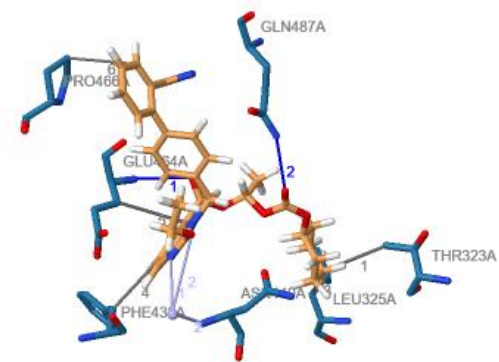

Carmofur

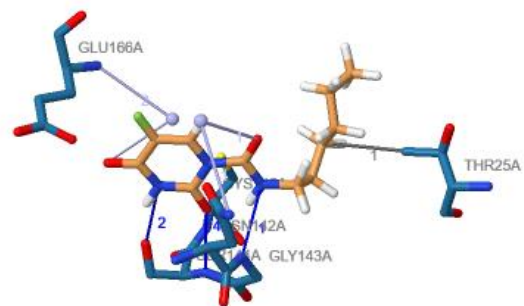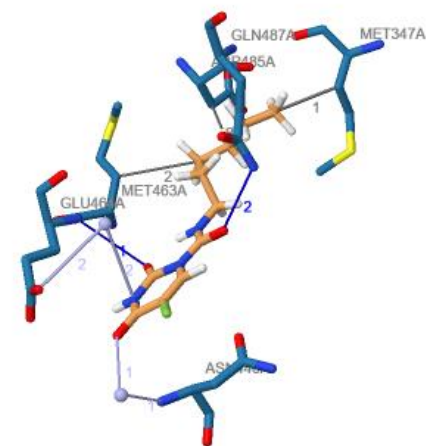

|              |                                                                                     |                                                                                      |
|--------------|-------------------------------------------------------------------------------------|--------------------------------------------------------------------------------------|
| Chloroquine  | 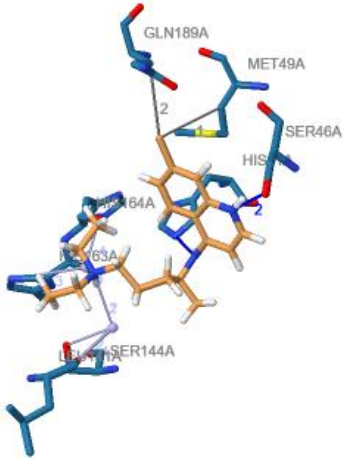  |   |
| Dipyridamole |  |  |
| Disulfiram   | N/A                                                                                 | N/A                                                                                  |



GC-373

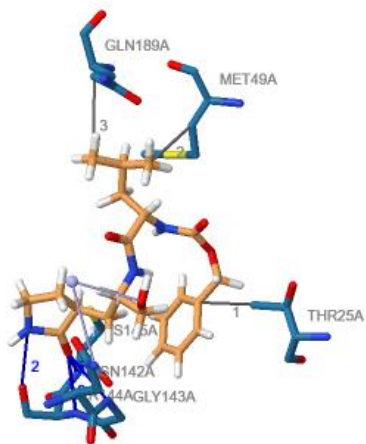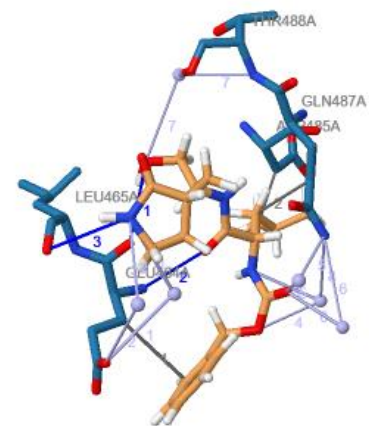

Hydroxychloroquine

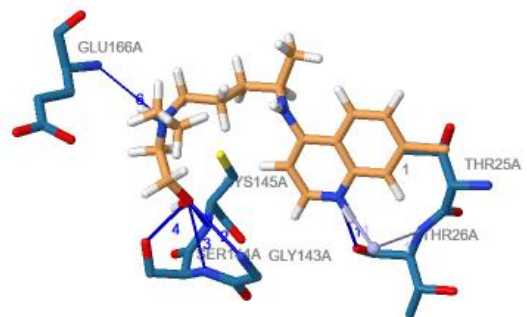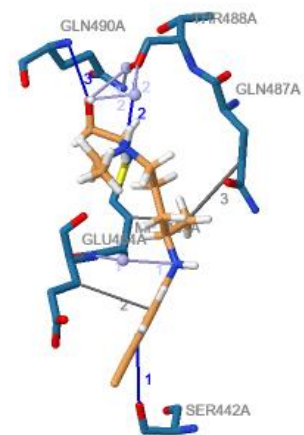

MG-115

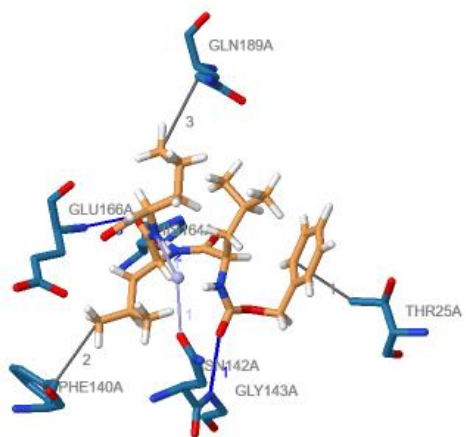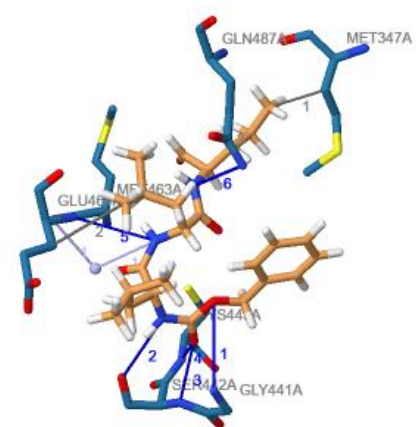

MG-132

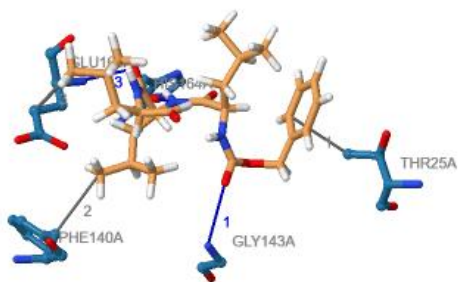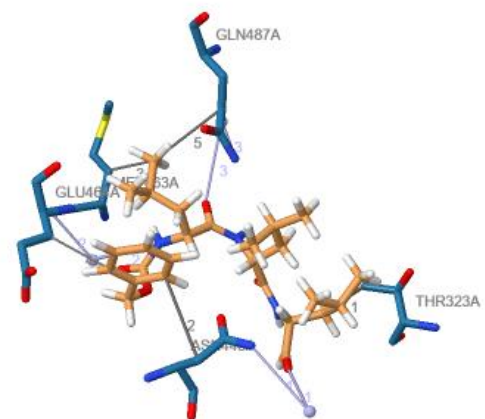

Narlaprevir

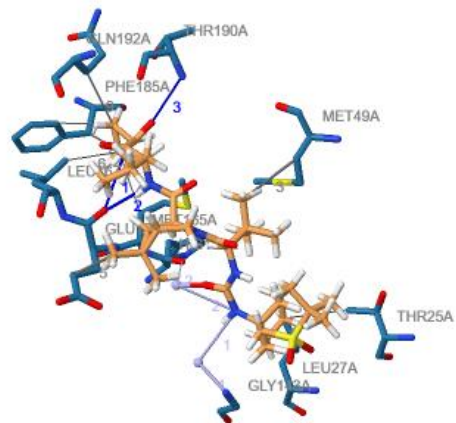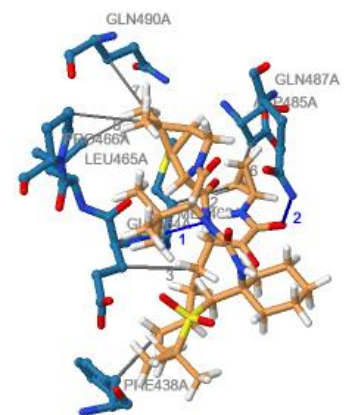

Omeprazole

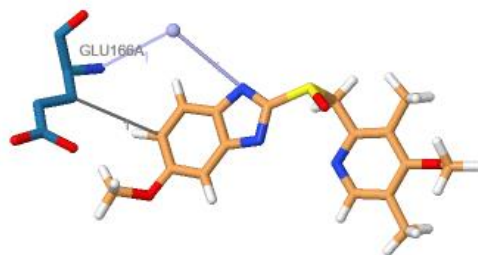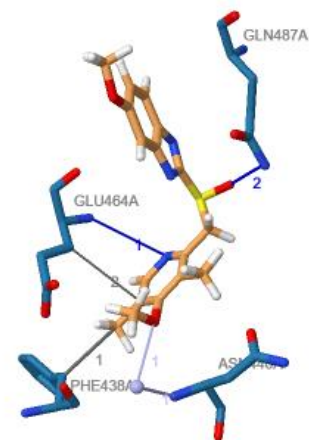

Oxytetracycline

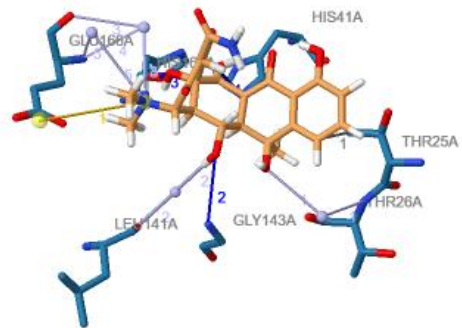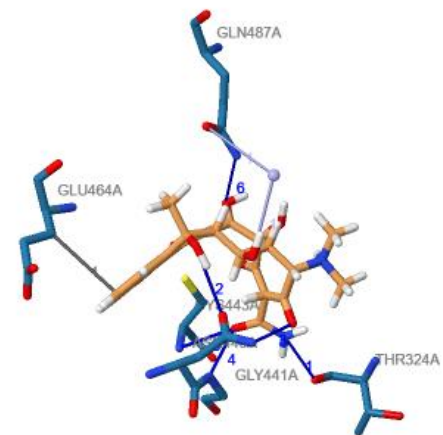

PX-12

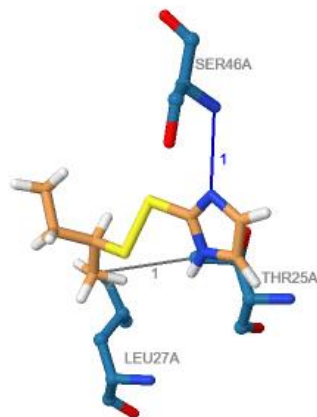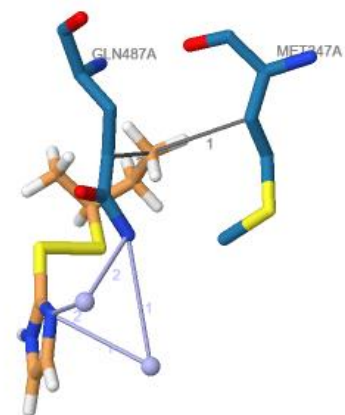

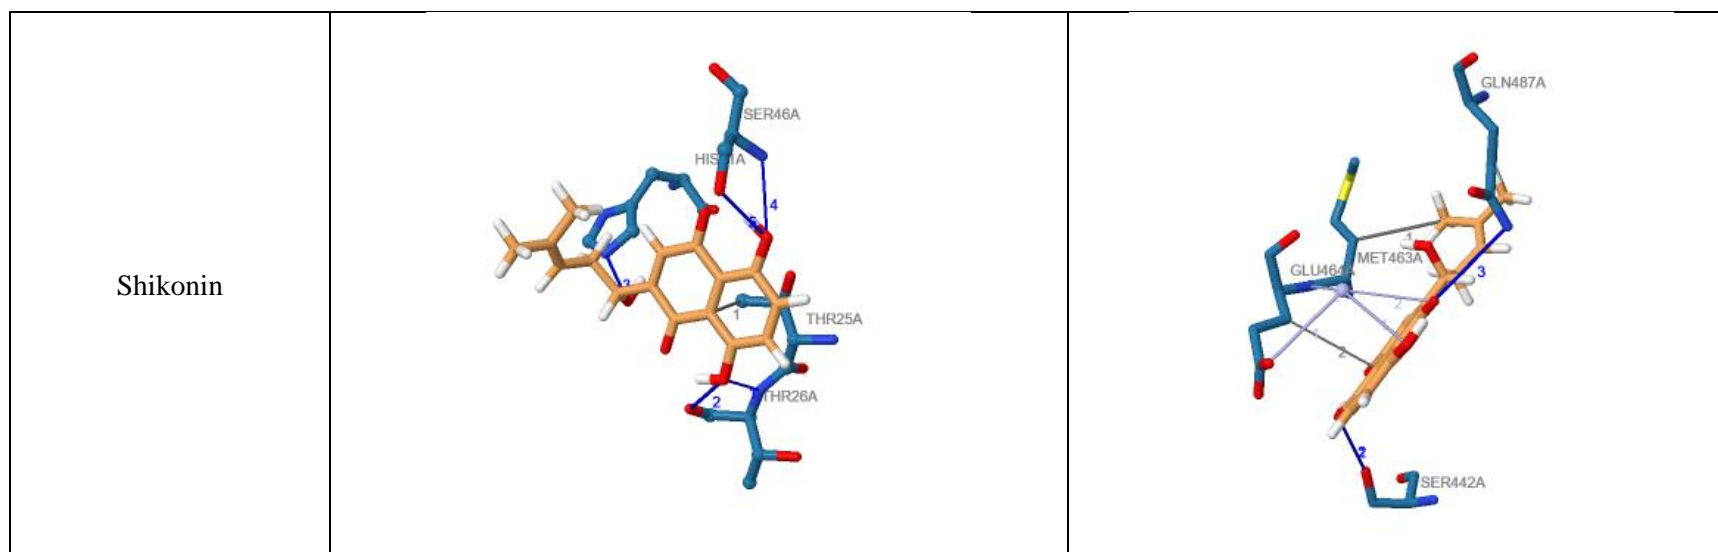

**Table S5.** The binding pose of other inhibitors to SARS-CoV-2 Mpro.

| Name | Monomer | Dimer |
|------|---------|-------|
|------|---------|-------|



Bazedoxifene

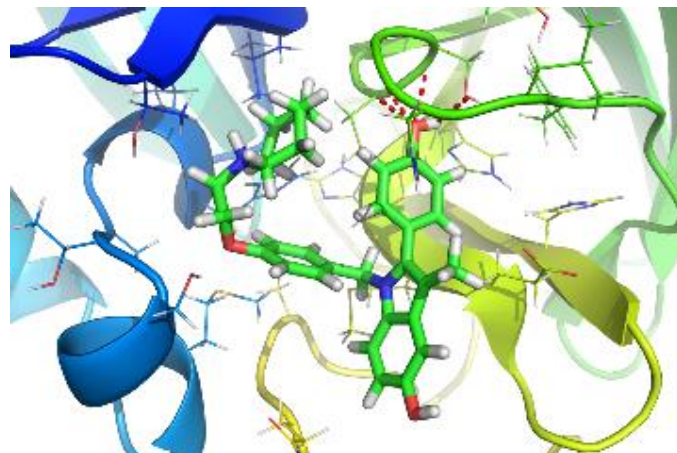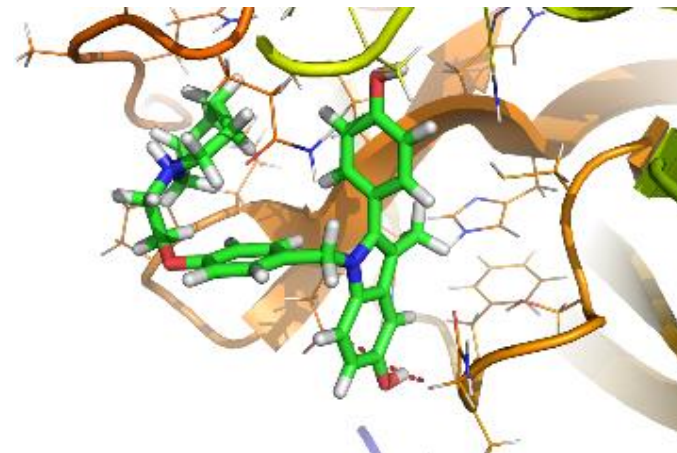

Cyclosporine

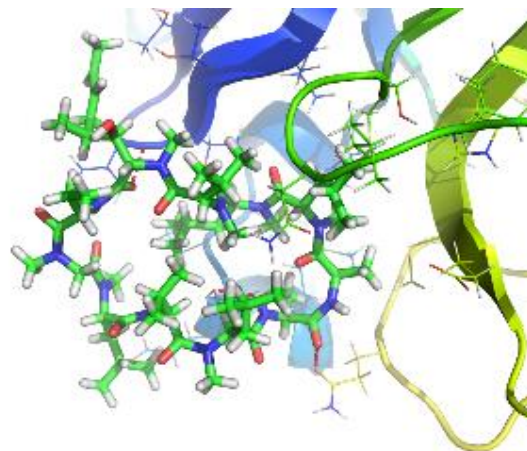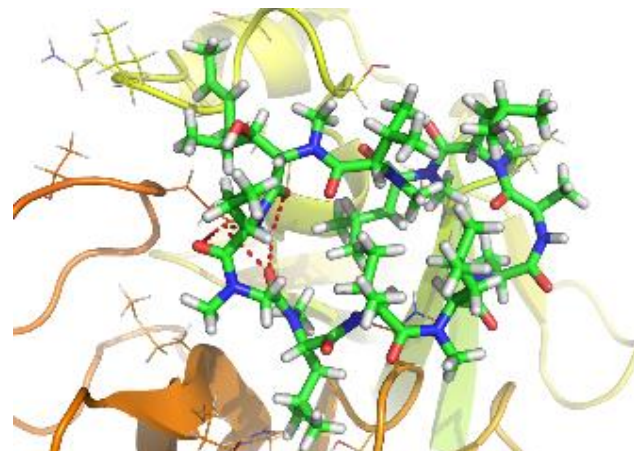

Digitoxin

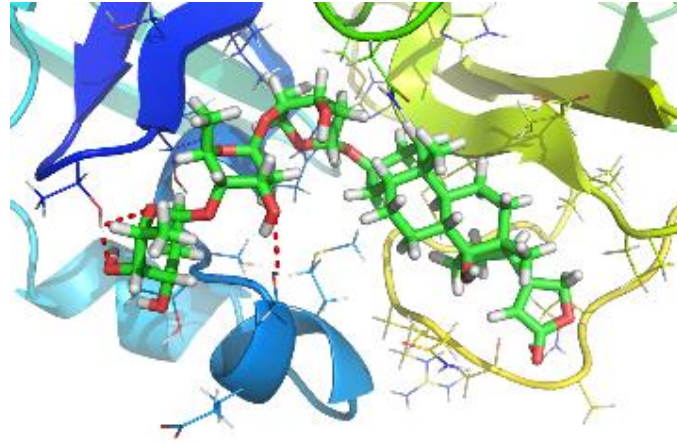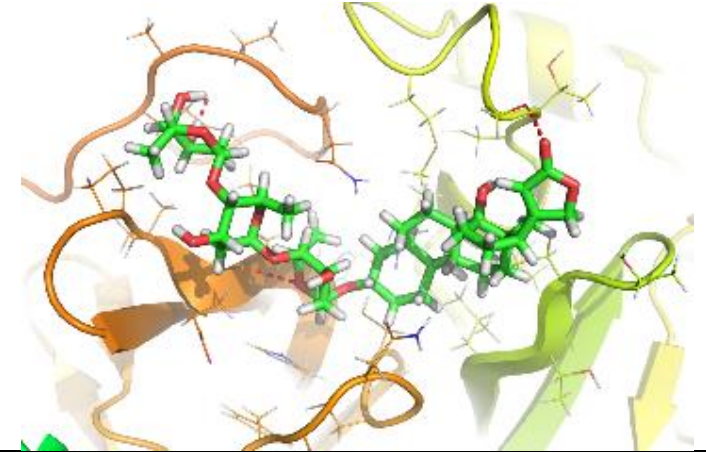

Digoxin

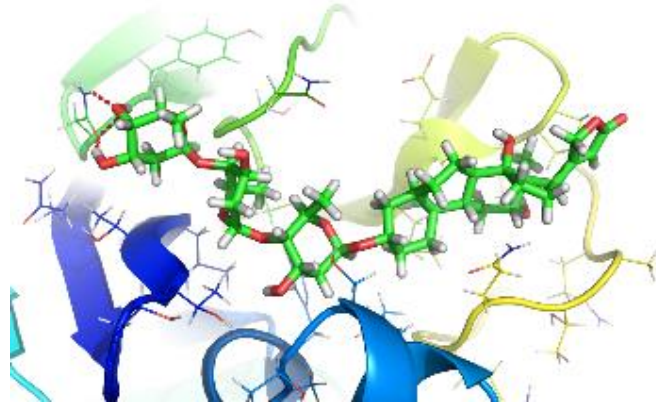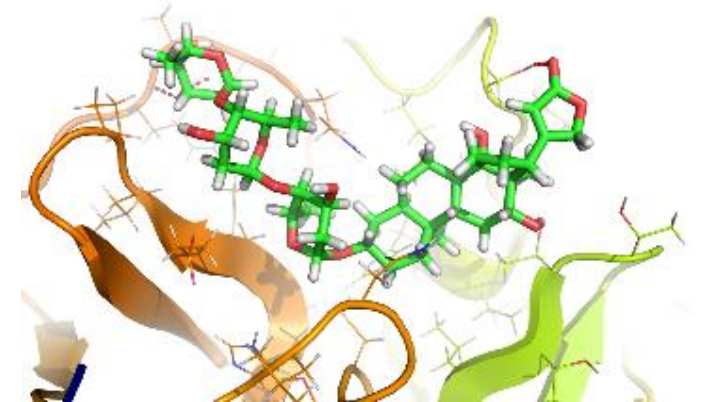

Dihydrogambogic Acid

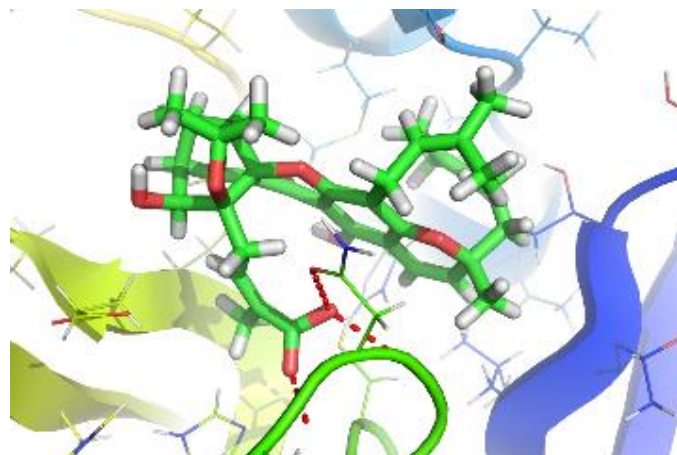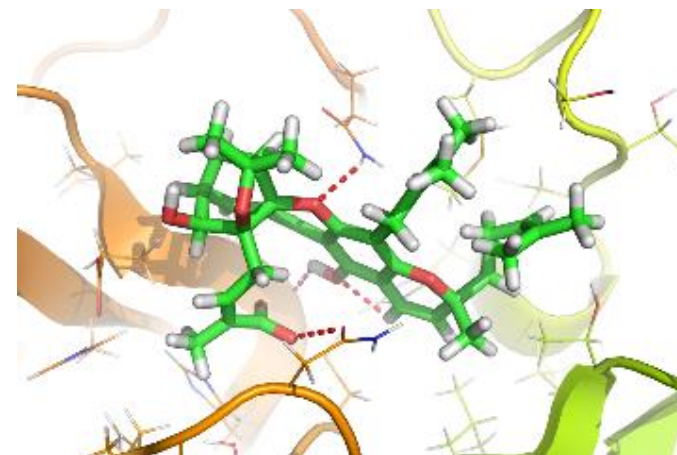

Ebastine

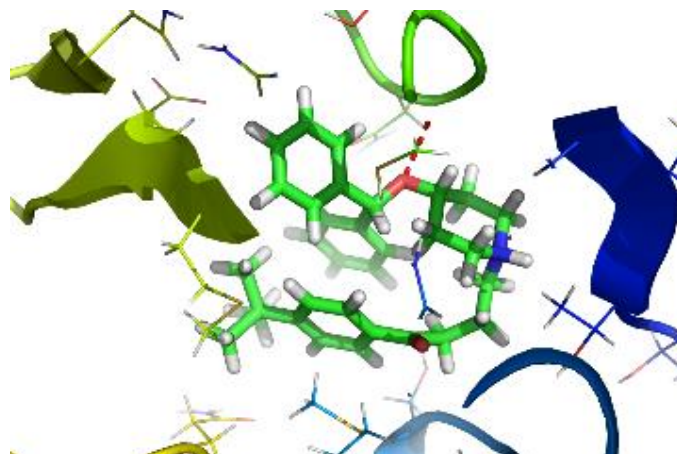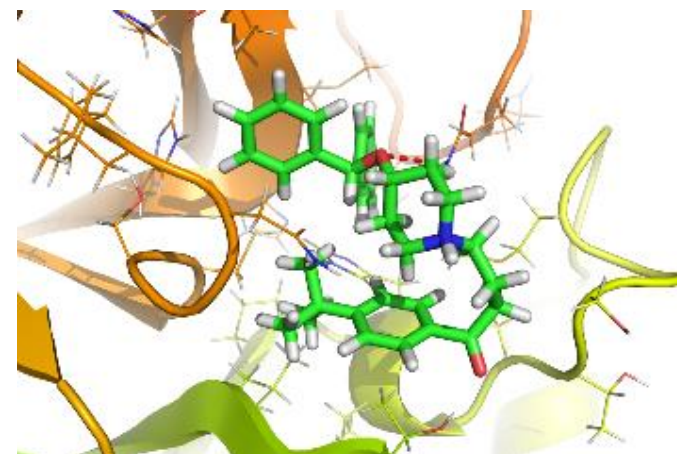



Favipiravir

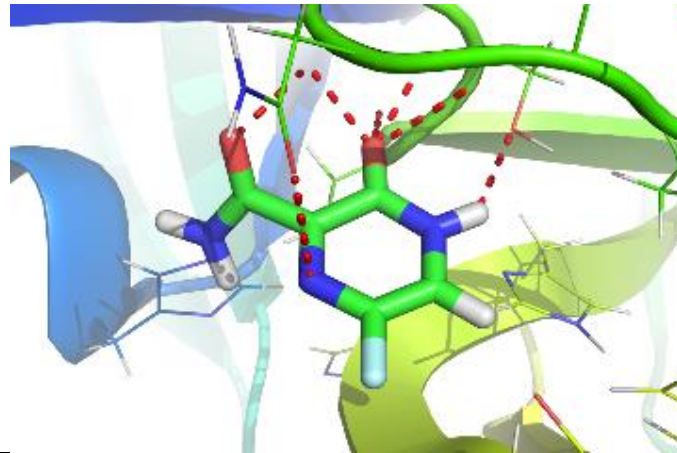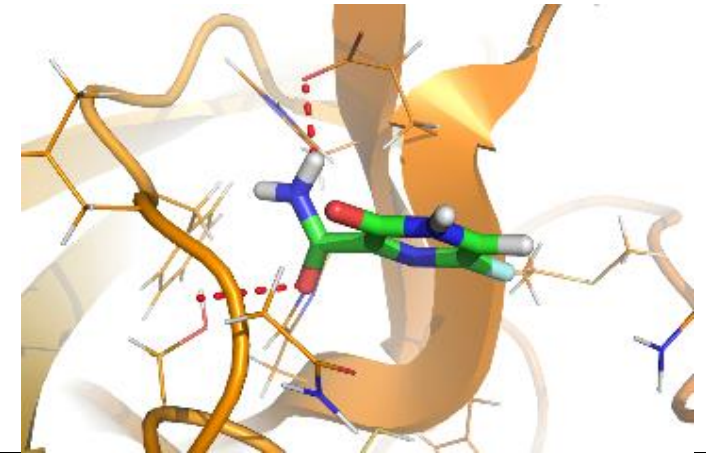

Fluspirilene

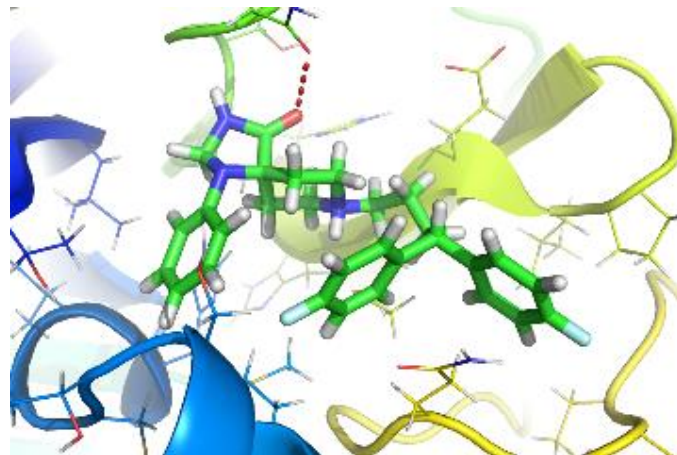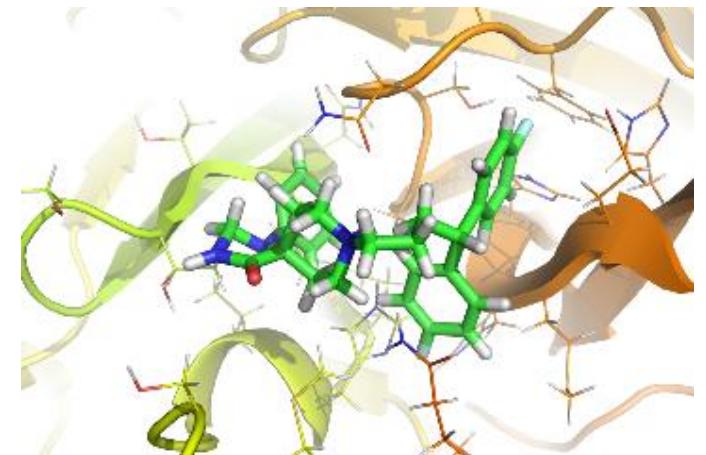

Isoosajin

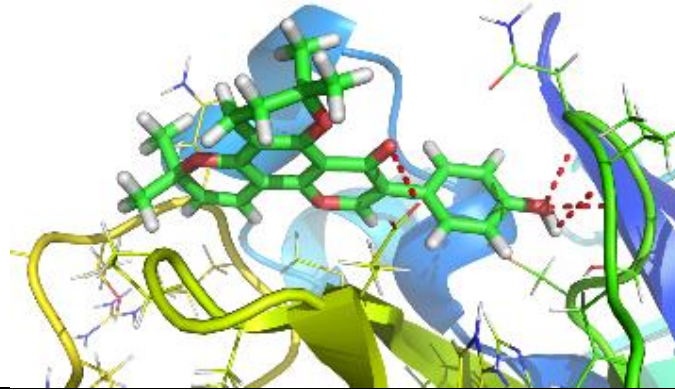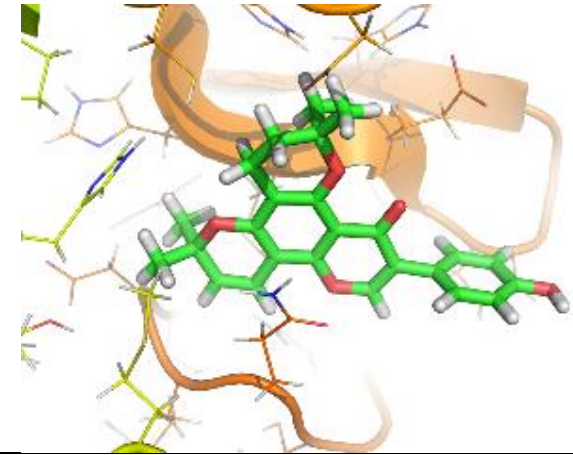

Ivacaftor

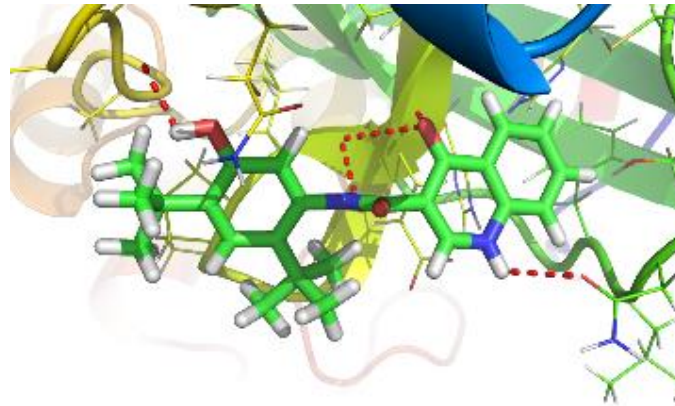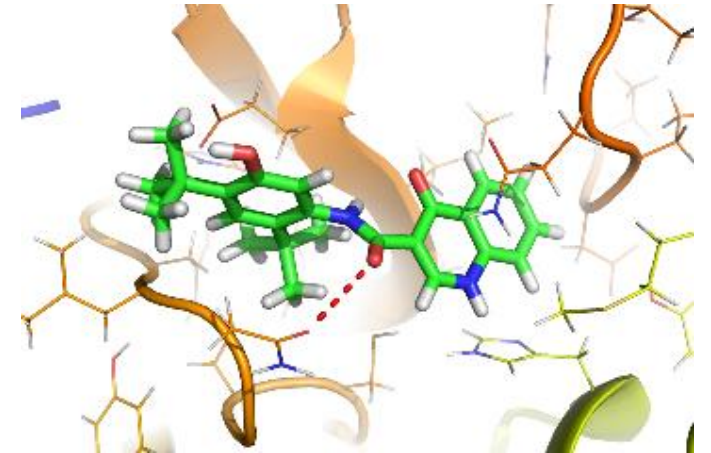



Lusutrombopag

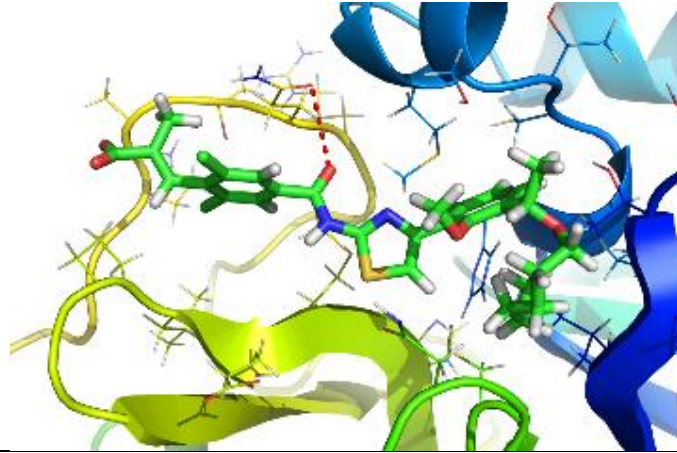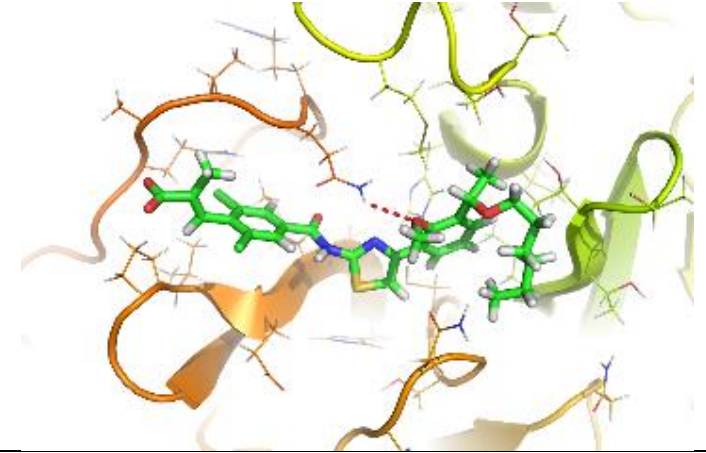

Mefloquine

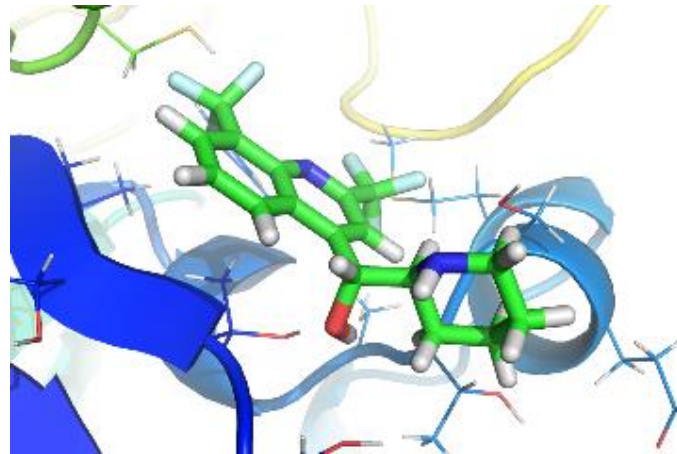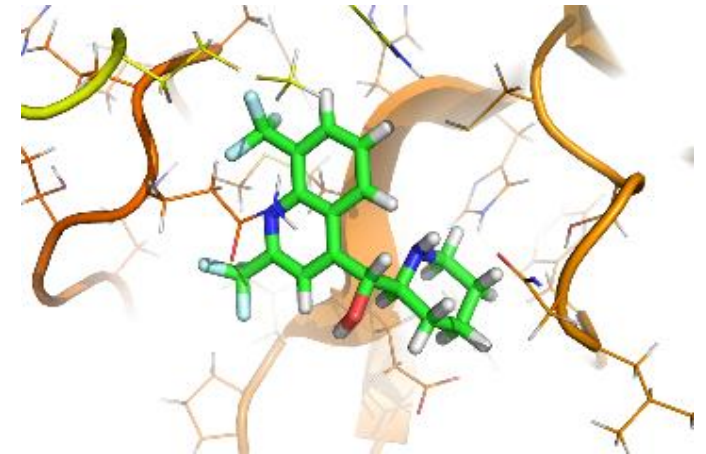

Mequitazine

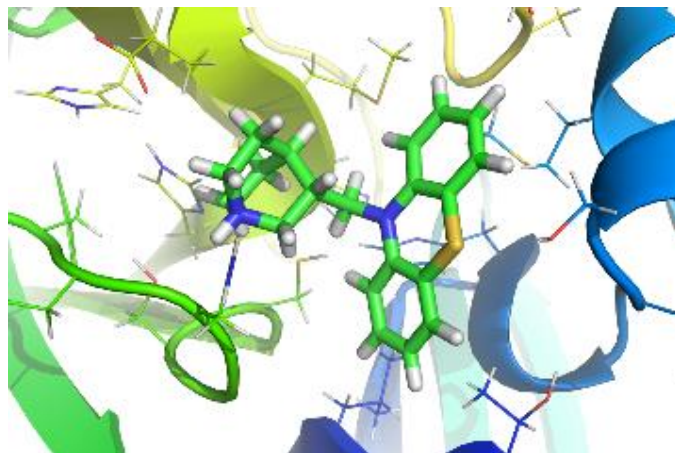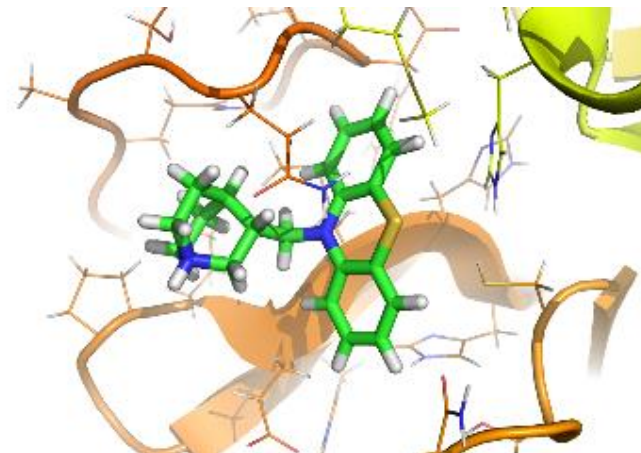

Osajin

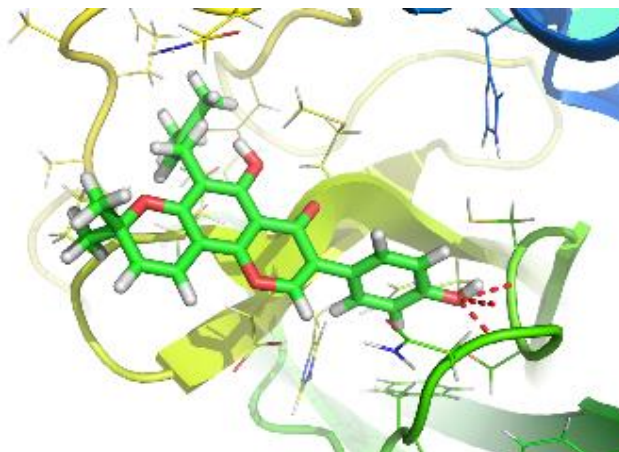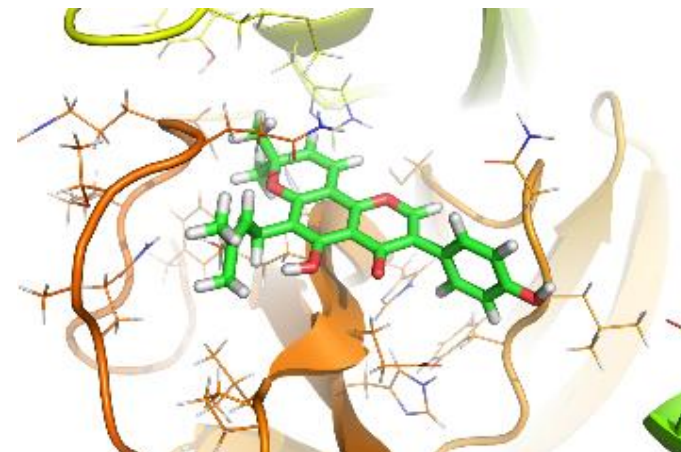

Oxyclozanide

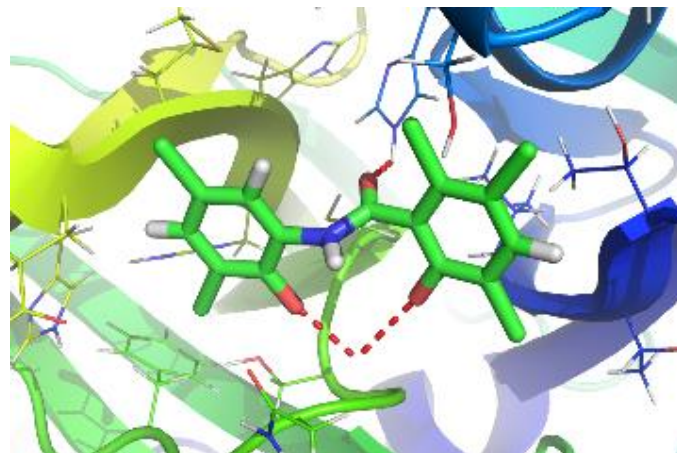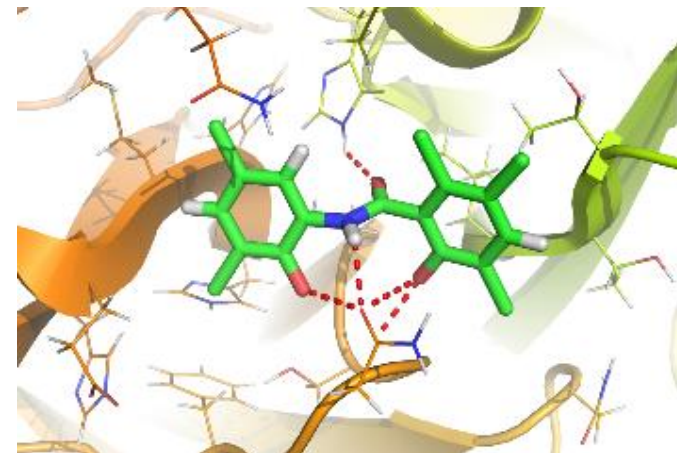

Penfluridol

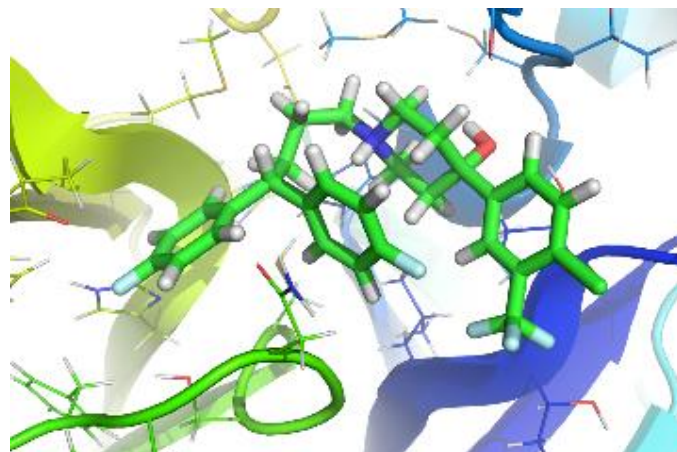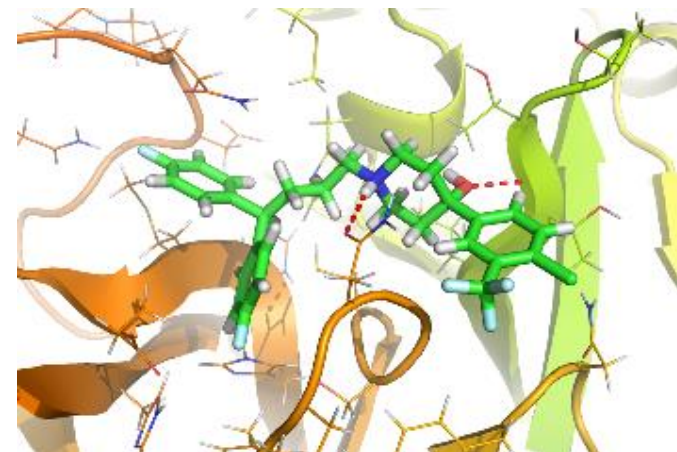



Phenazopyridine

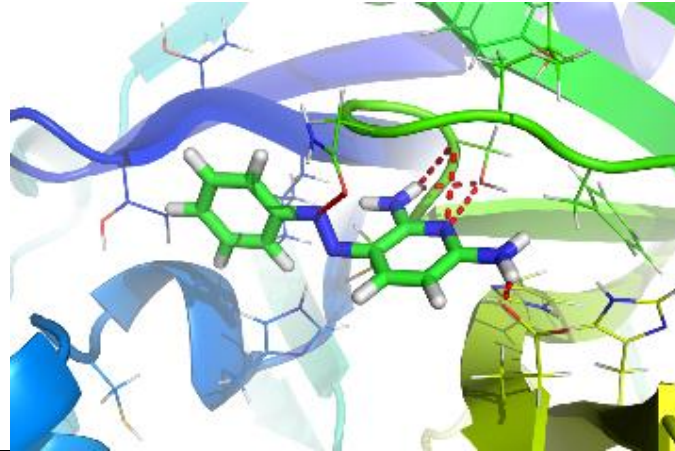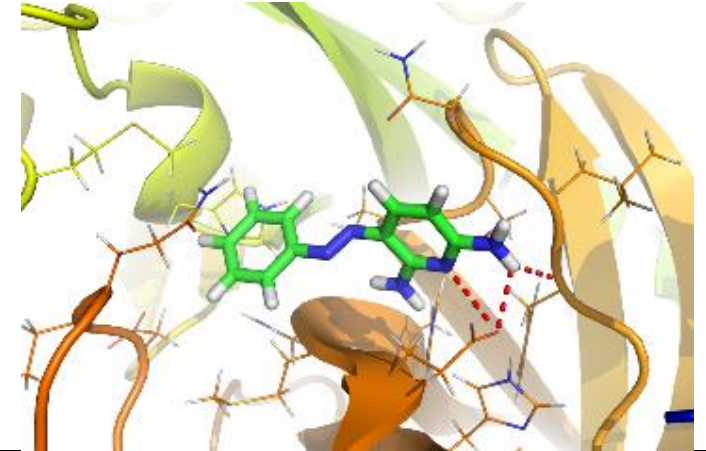

Proscillaridin

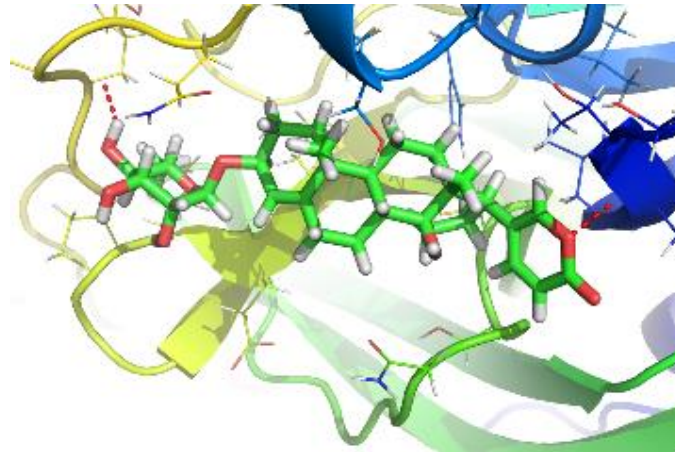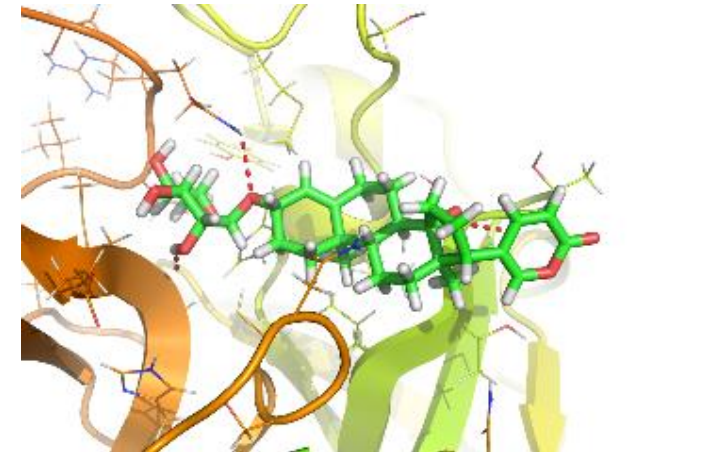

Tetrandrine

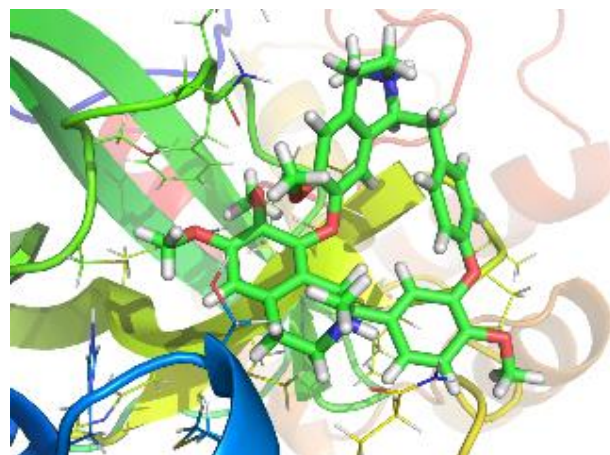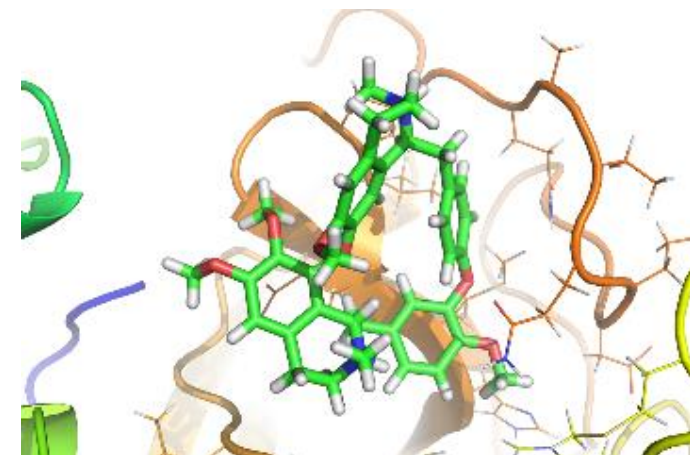



**Table S6.** The Pulling Force in Time Evolution.

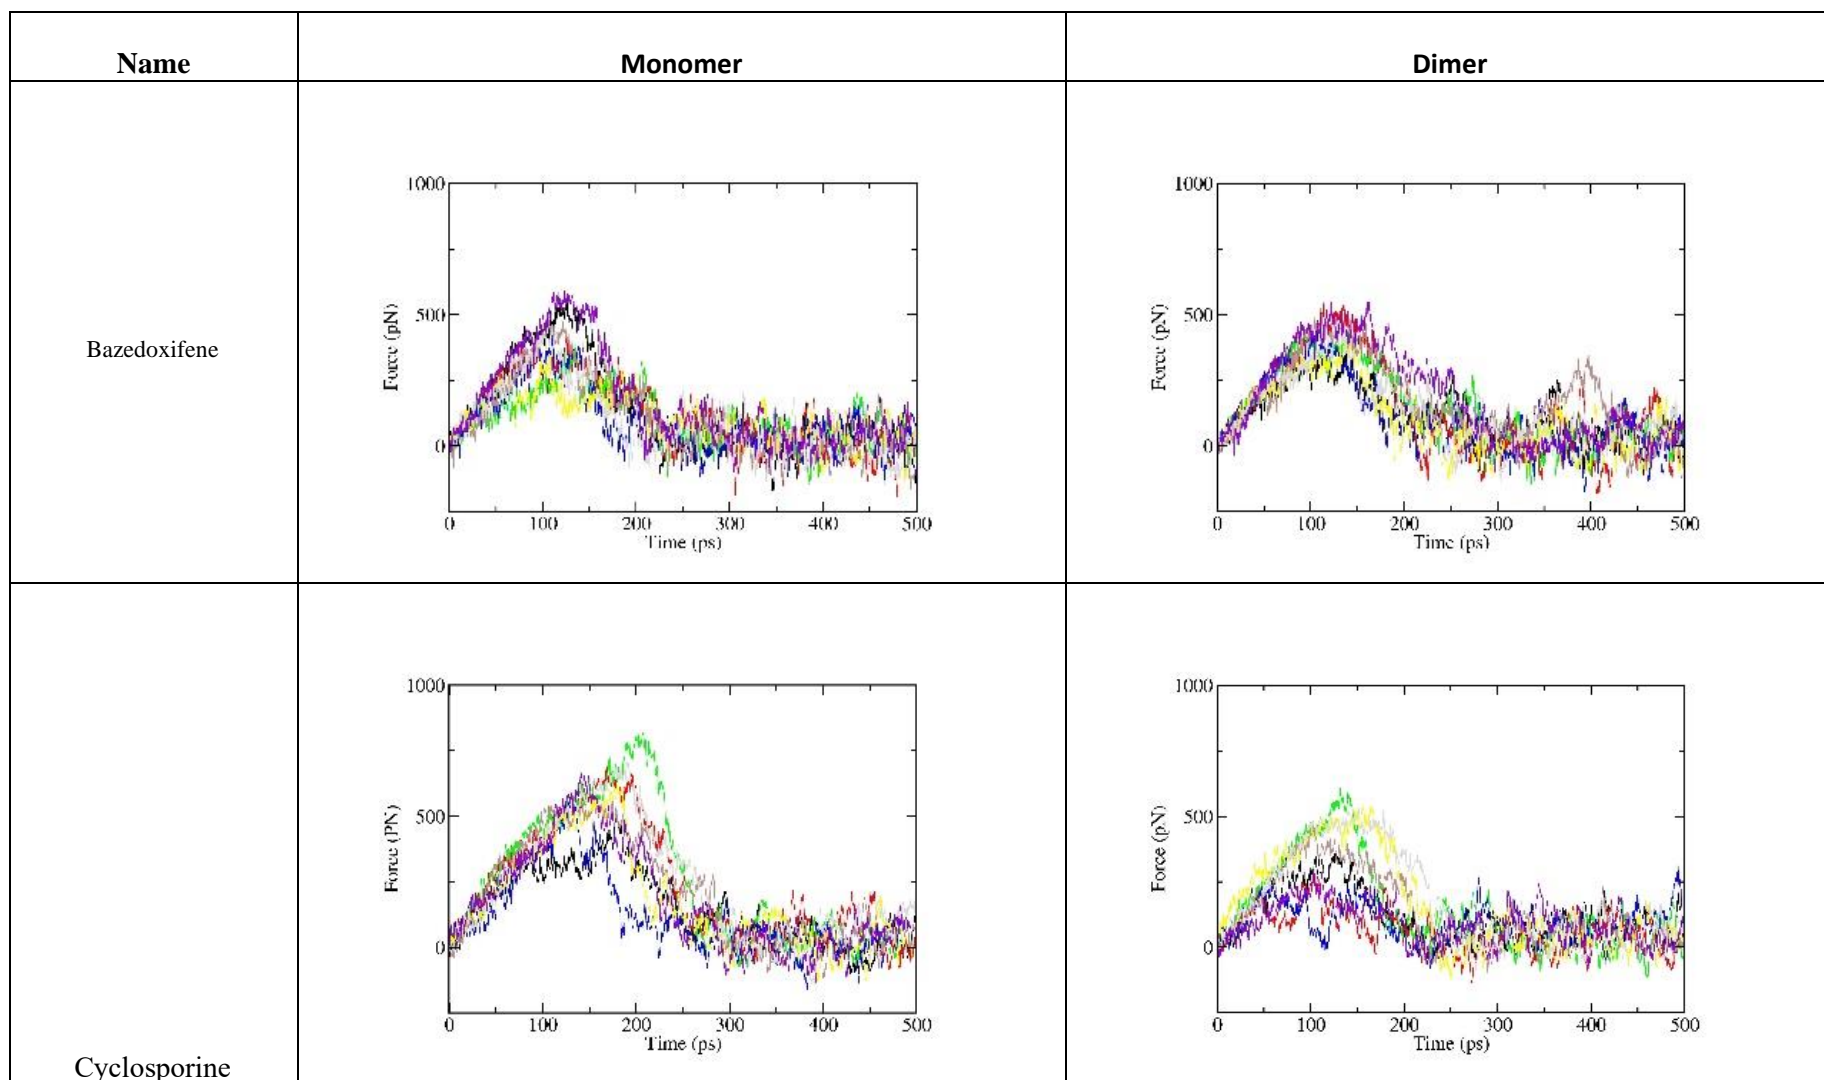

Digitoxin

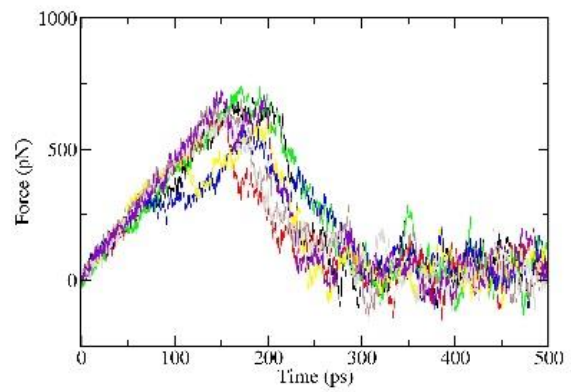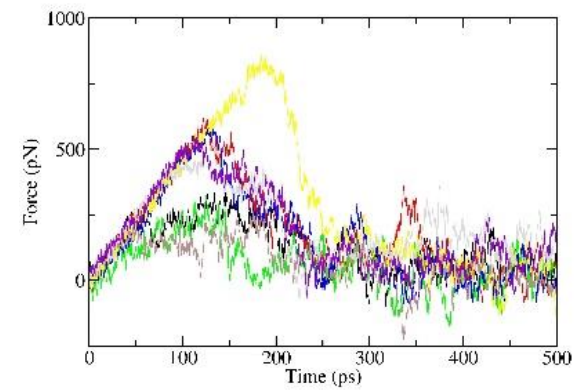

Digoxin

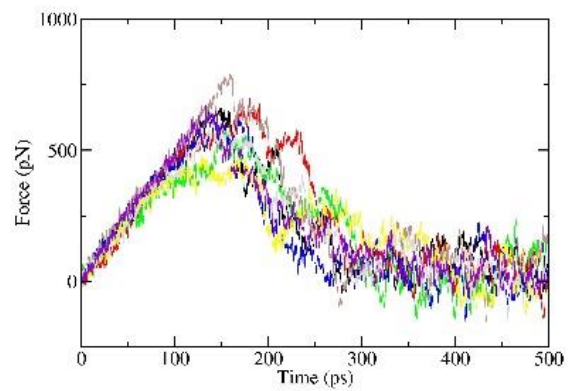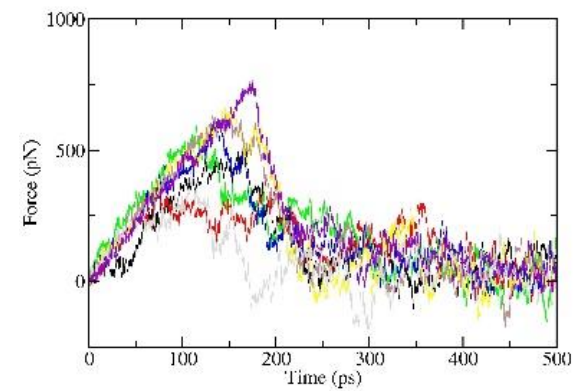

Dihydrogambogic  
Acid

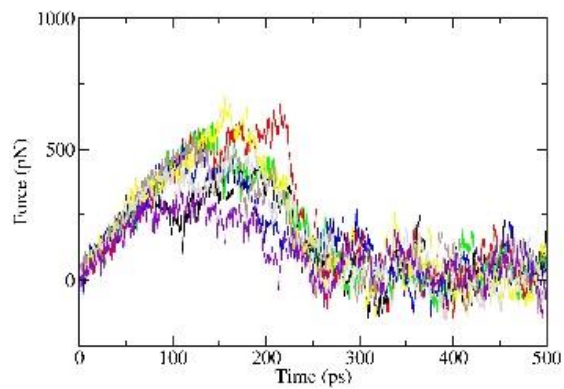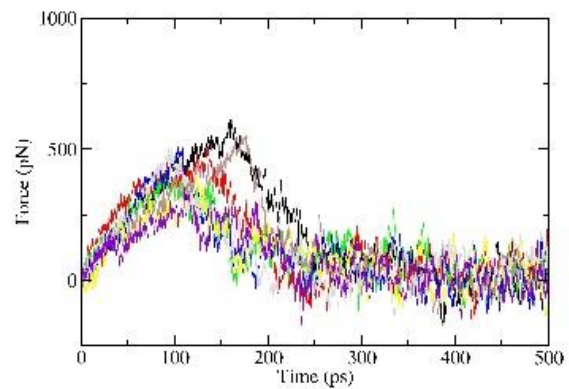

Ebastine

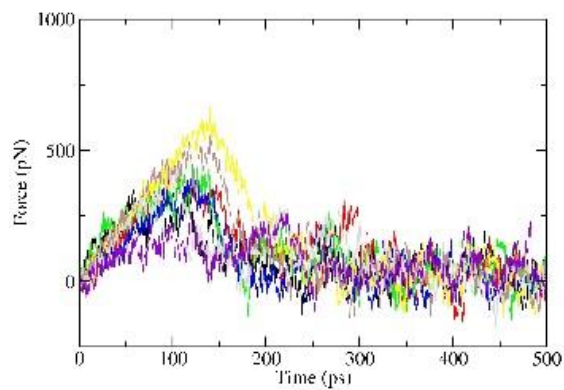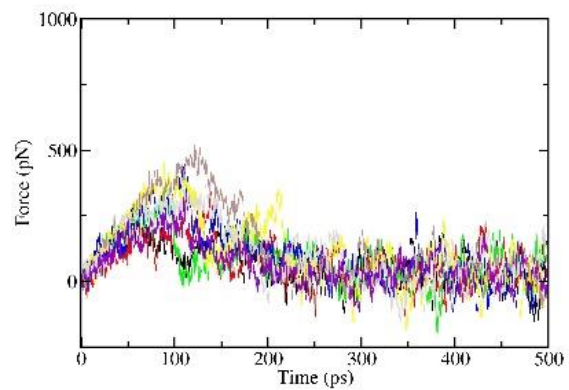

Favipiravir

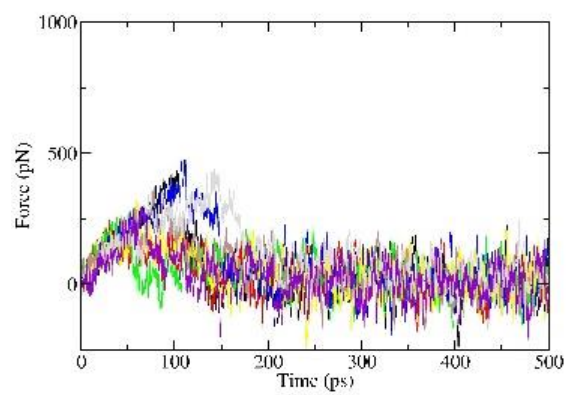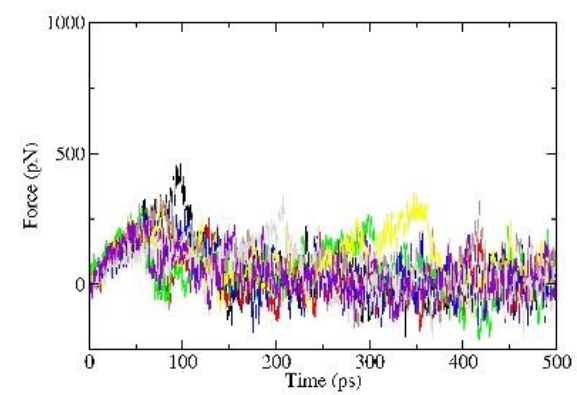

Fluspirilene

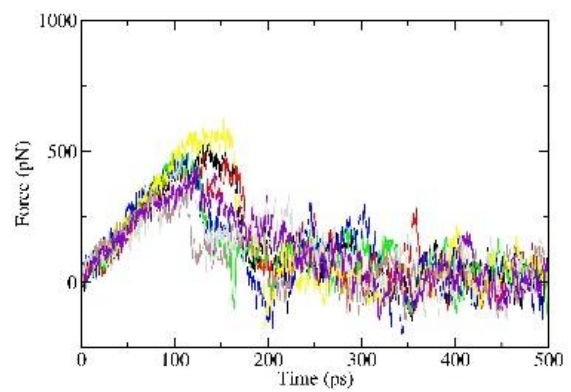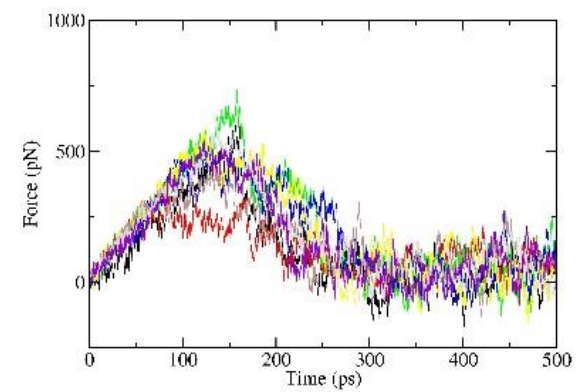

Isoosajin

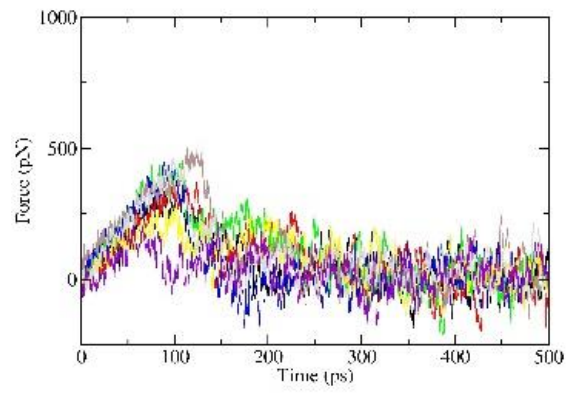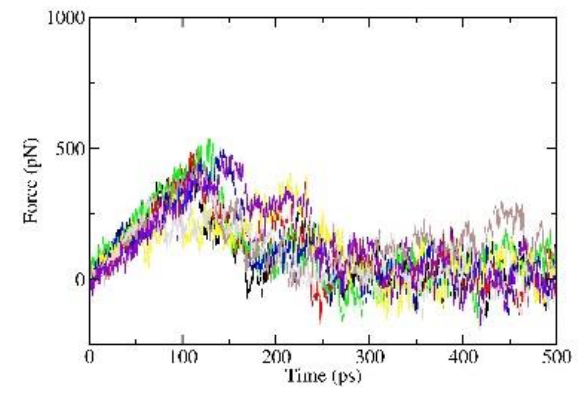

Ivacaftor

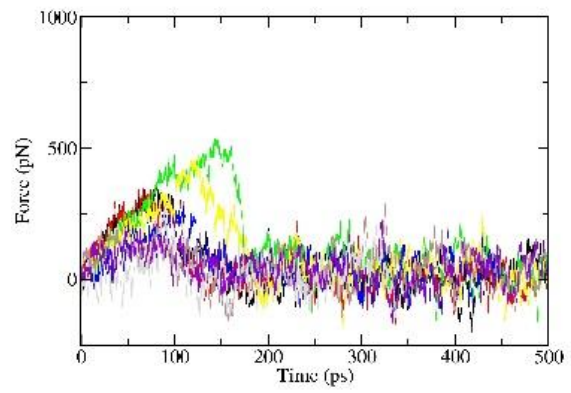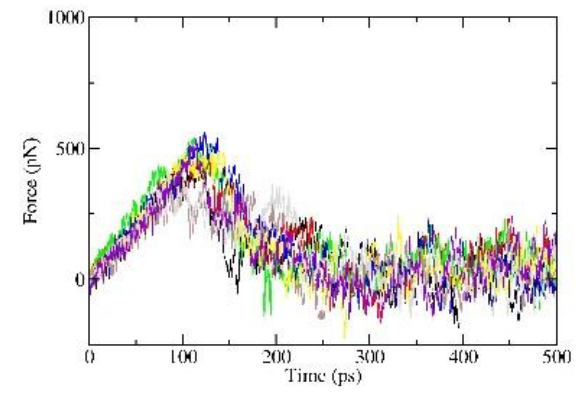



Lusutrombopag

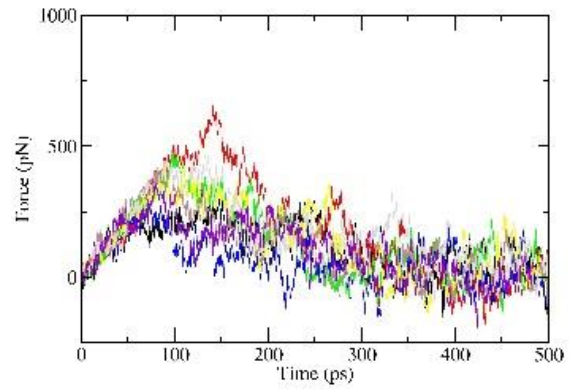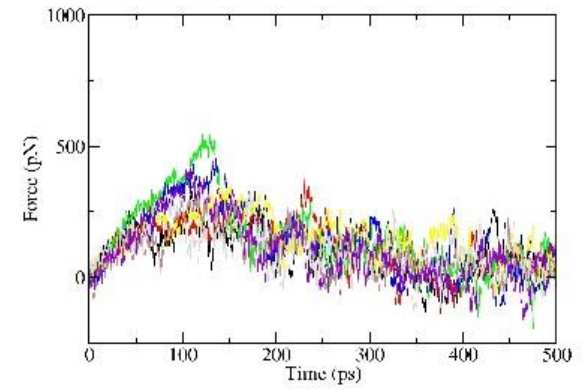

Mefloquine

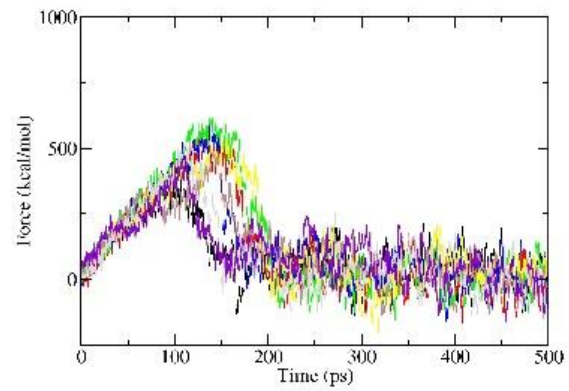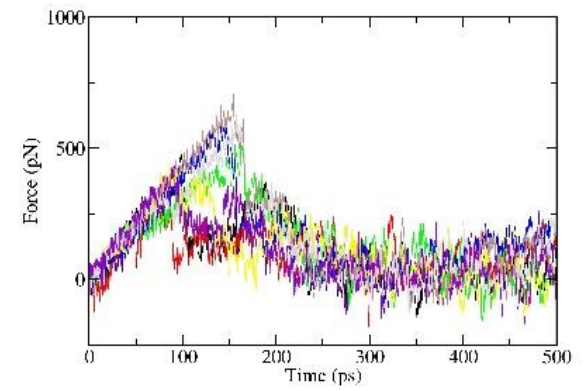

Mequitazine

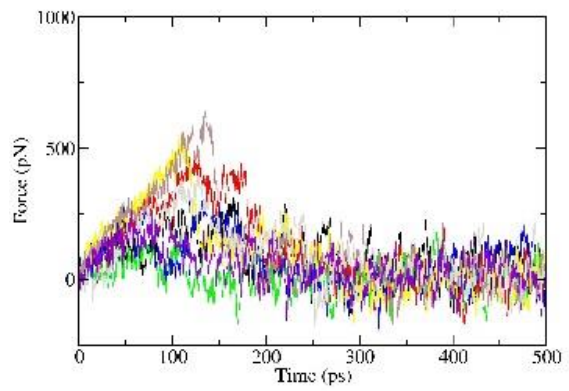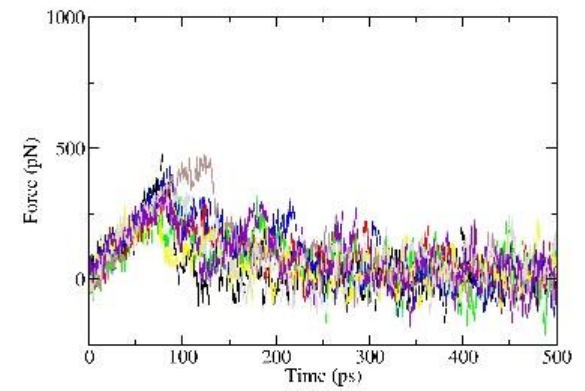

Osajin

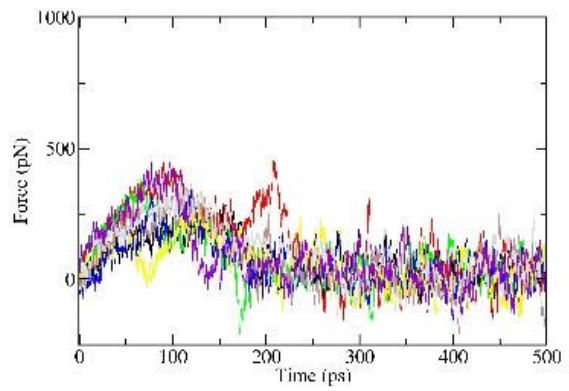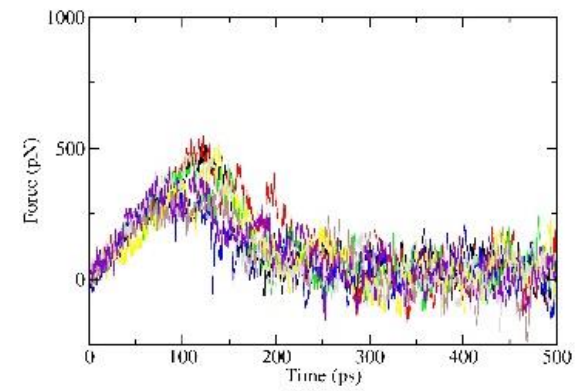

Oxyclozanide

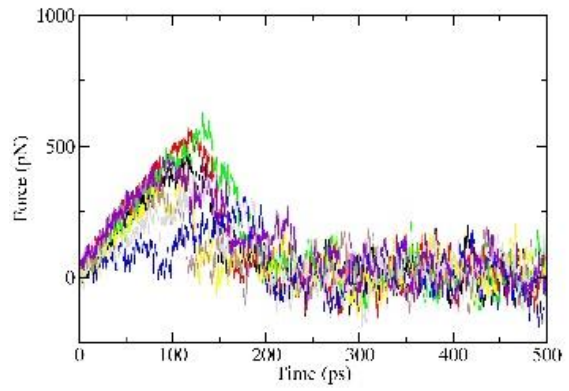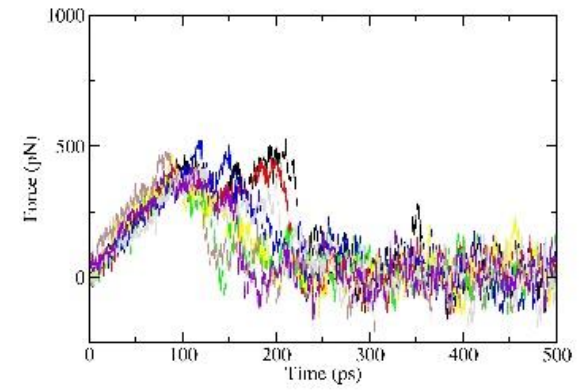

Penfluridol

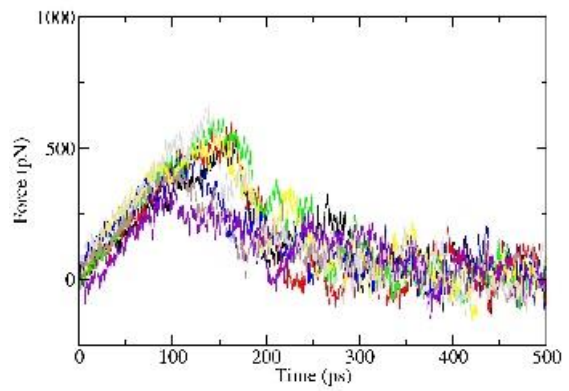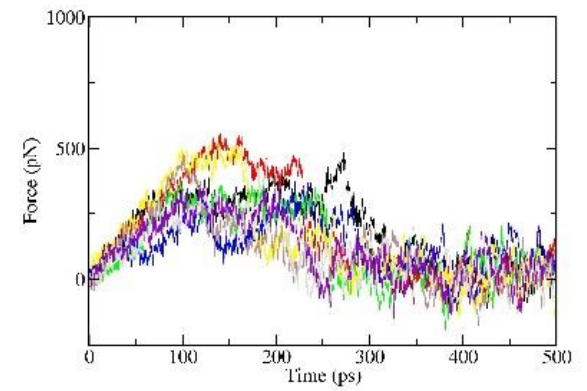

Phenazopyridine

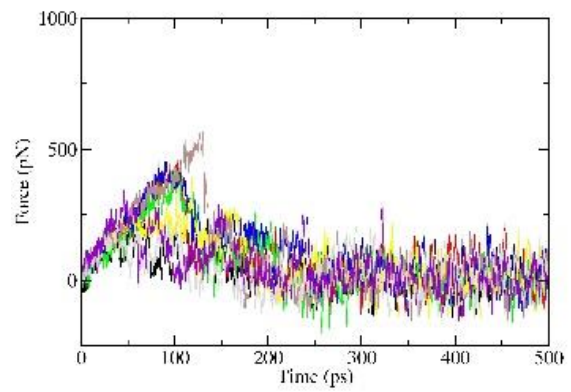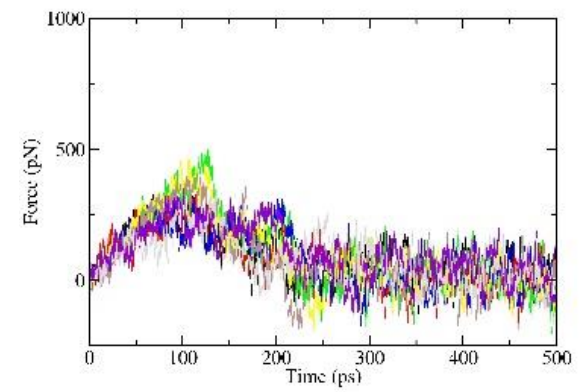

Proscillaridin

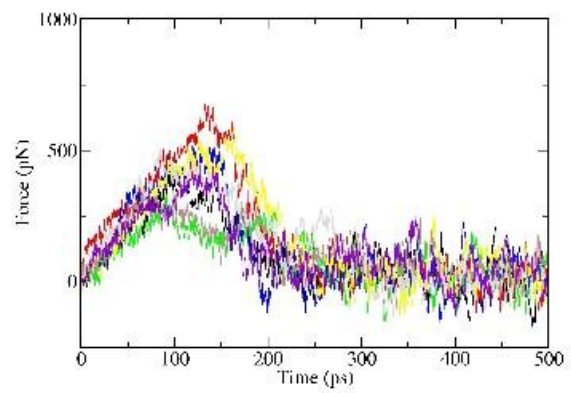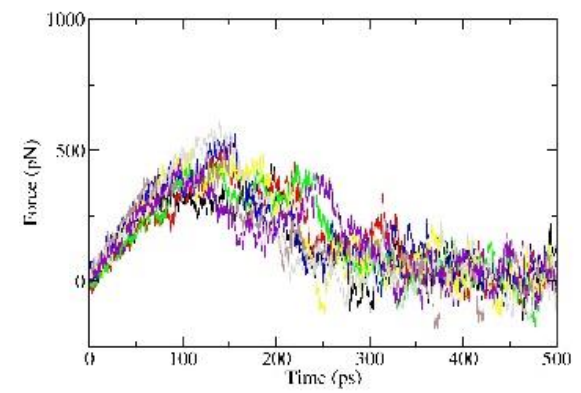

Tetrandrine

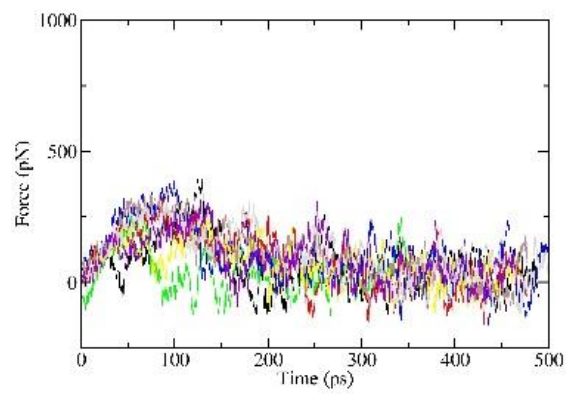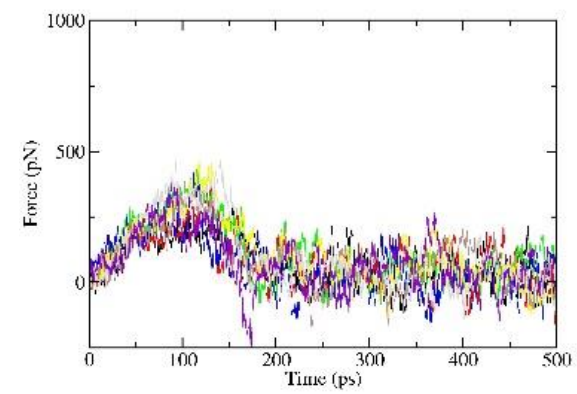



**Table S7.** The Pulling Work in Time Dependence over 8 Independent SMD Trajectories.

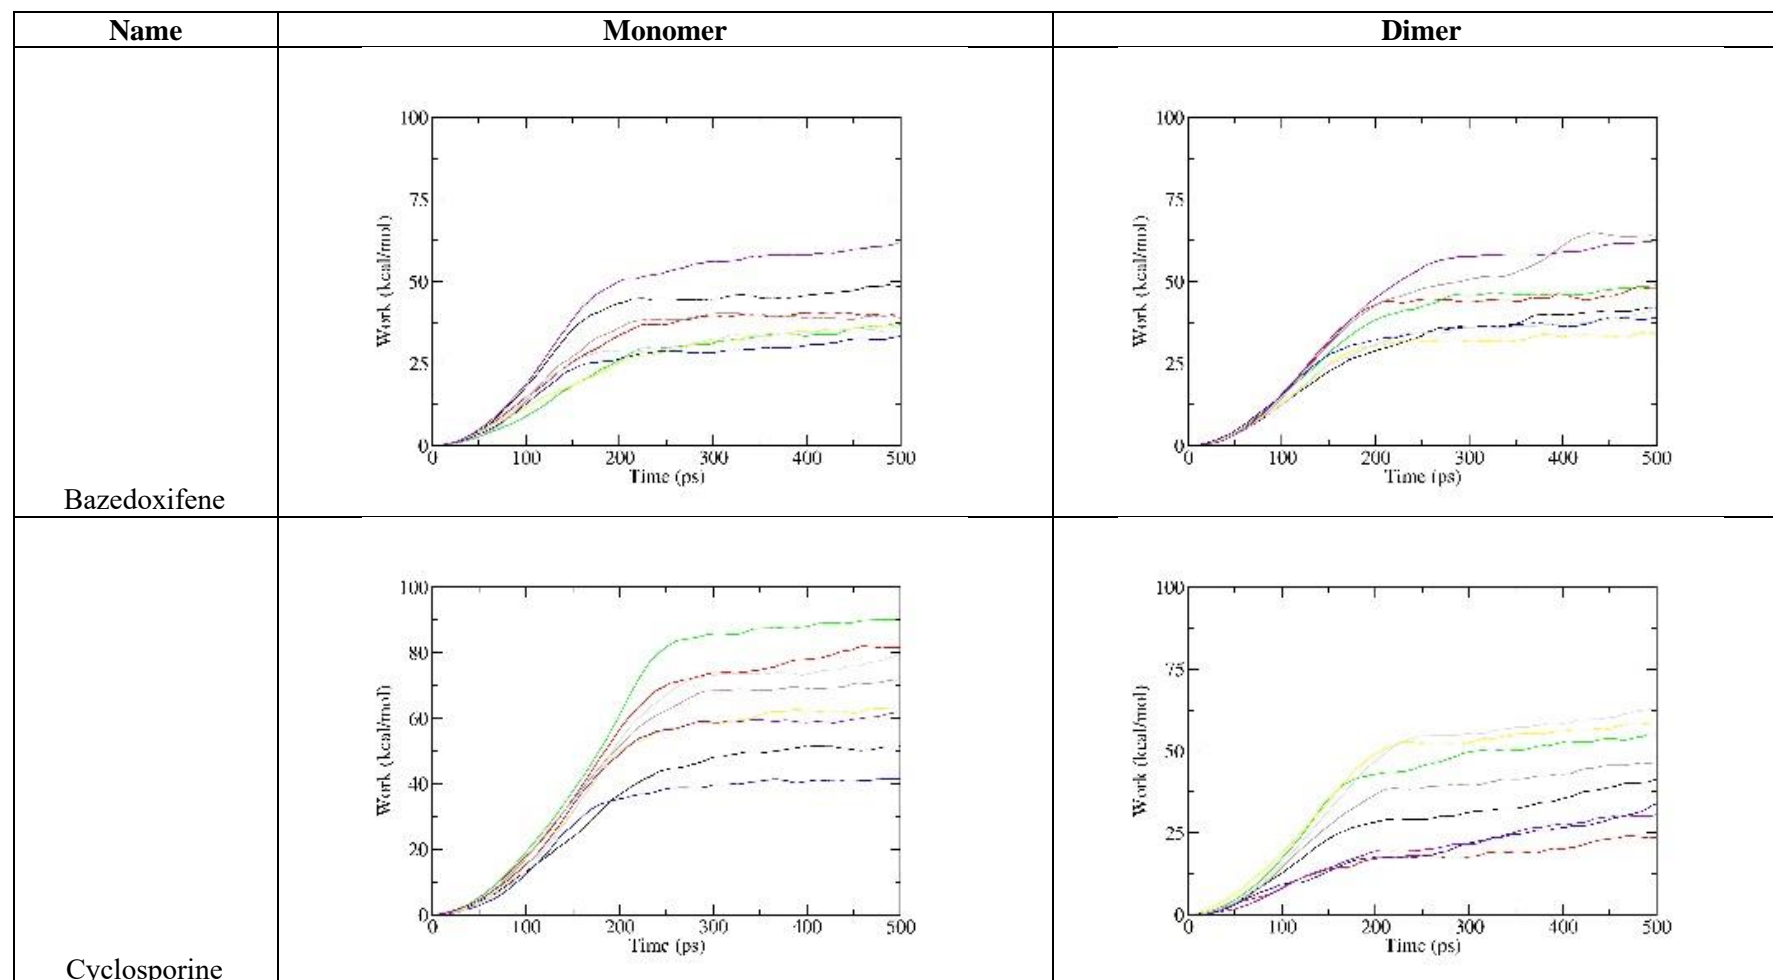

Digitoxin

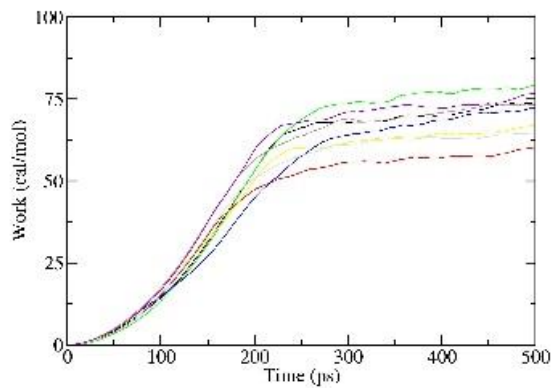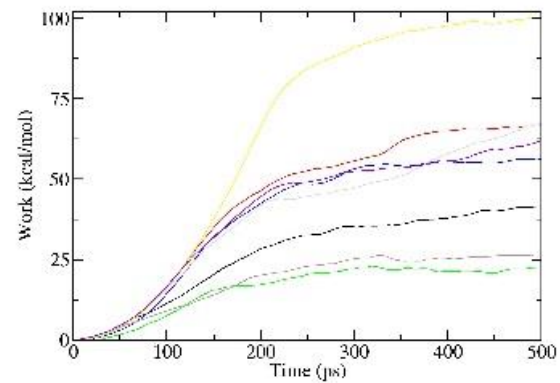

Digoxin

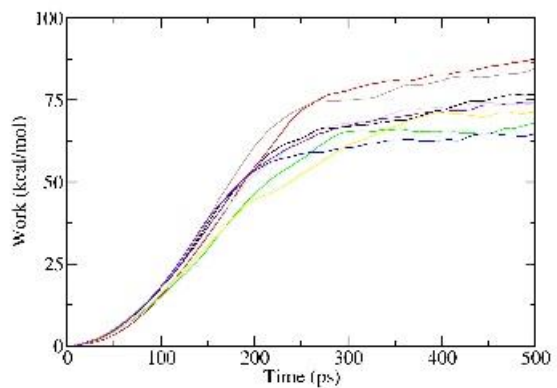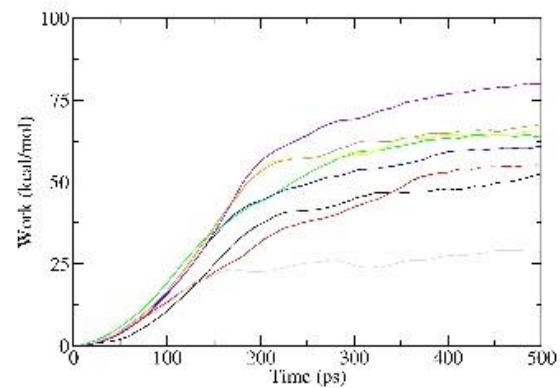

Dihydrogambogic  
Acid

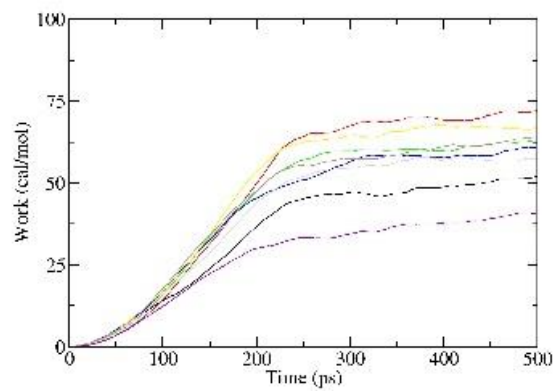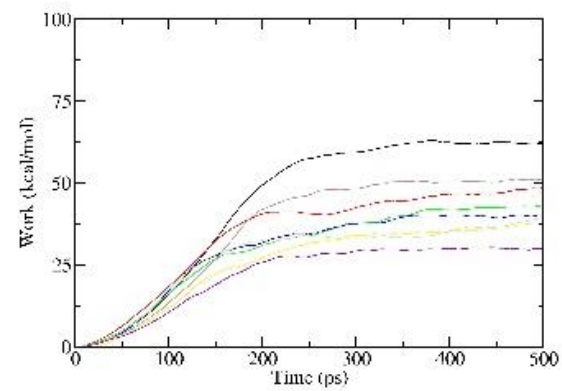

Ebastine

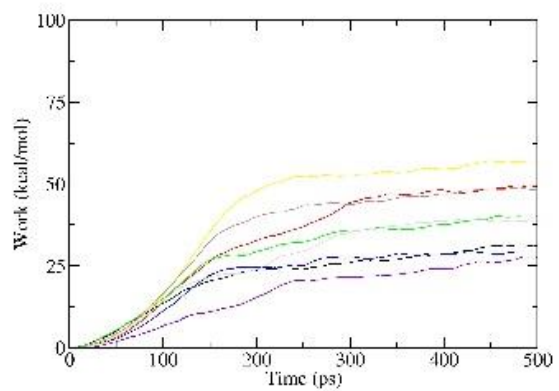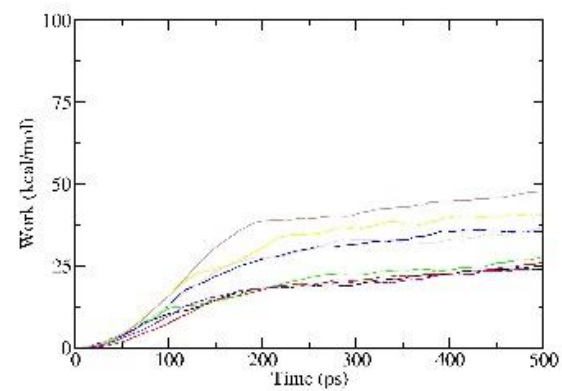

Favipiravir

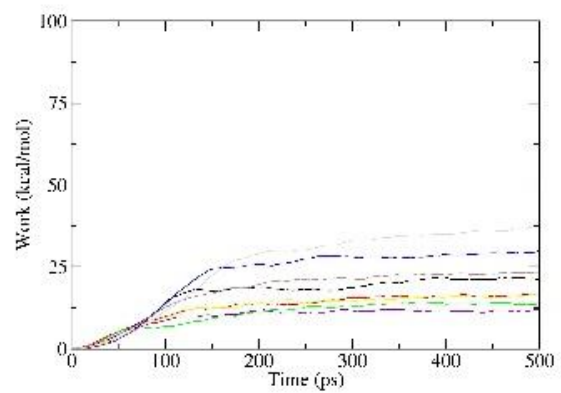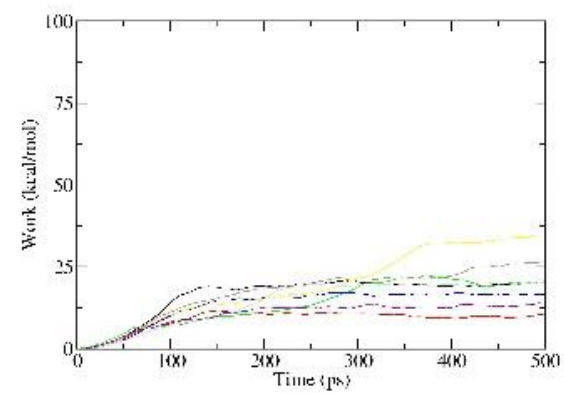

Fluspirilene

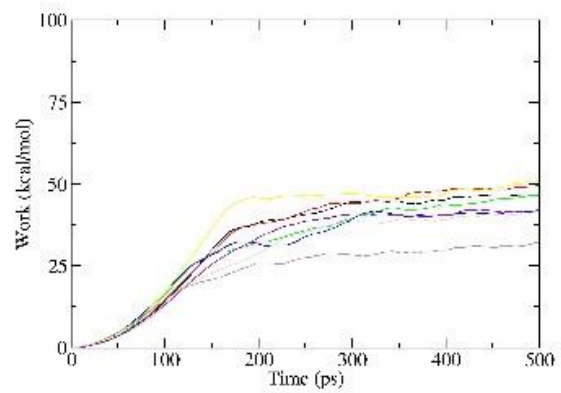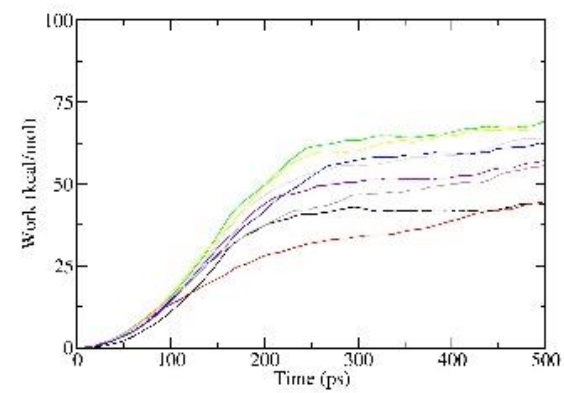

Isoosajin

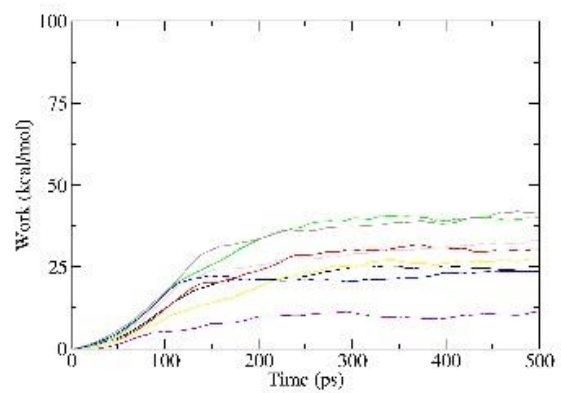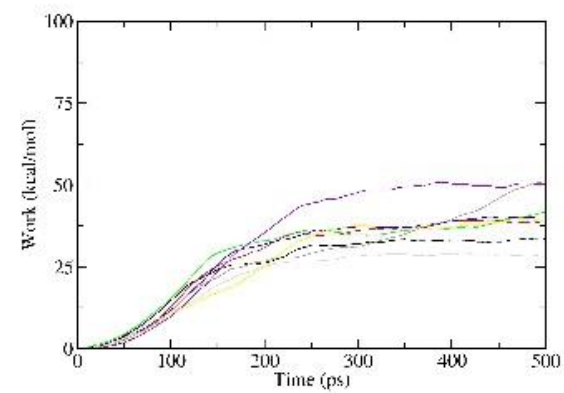

Ivacaftor

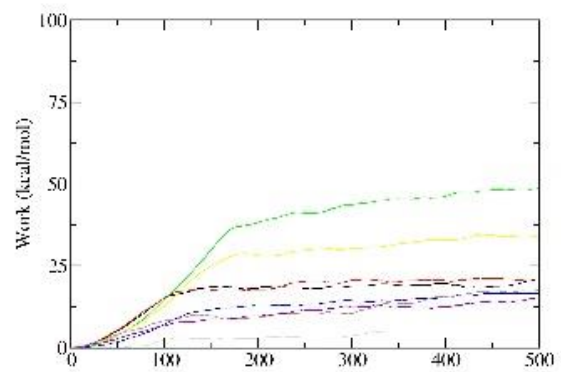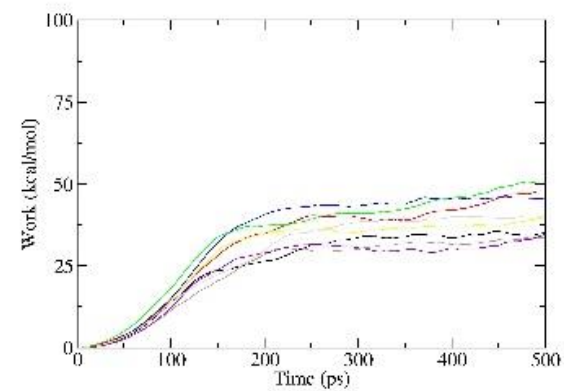



Lusutrombopag

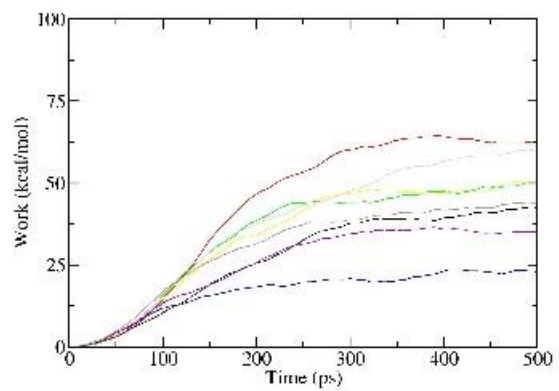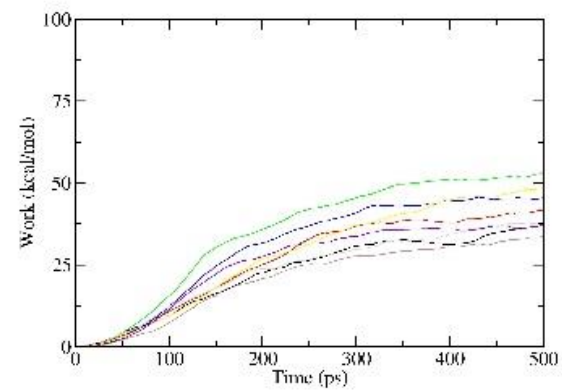

Mefloquine

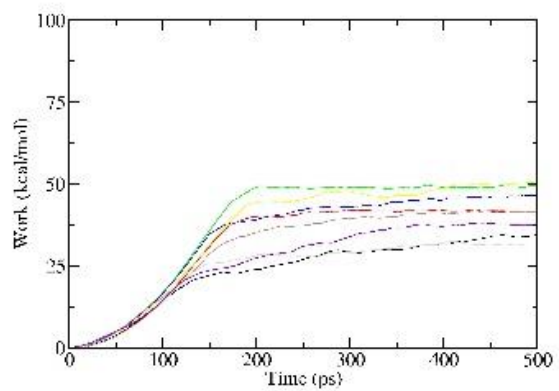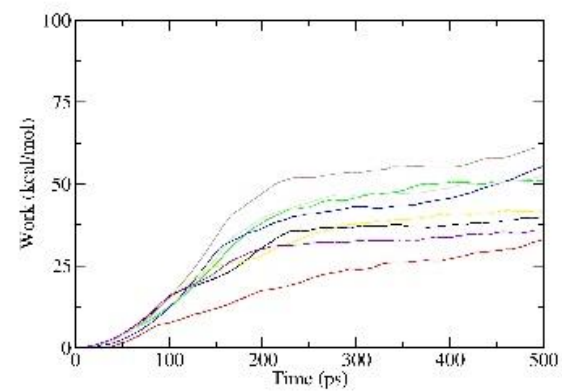

Mequitazine

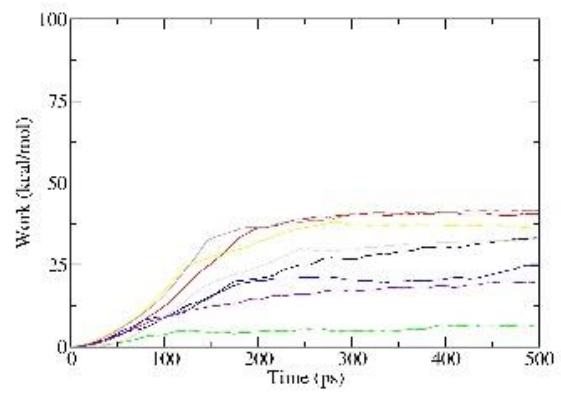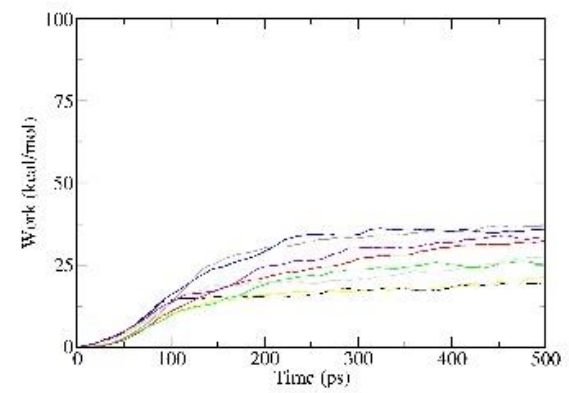

Osajin

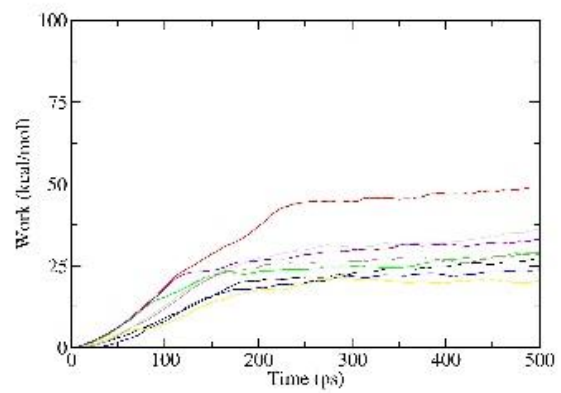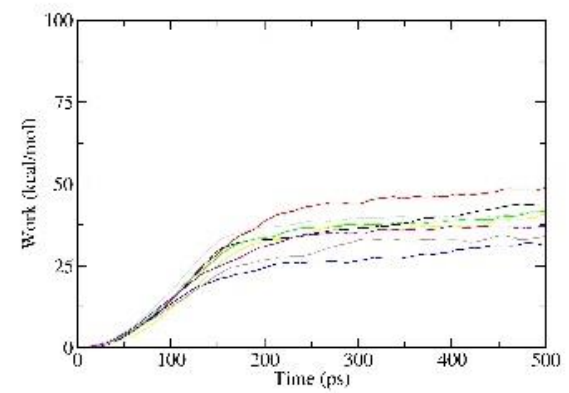

Oxyclozanide

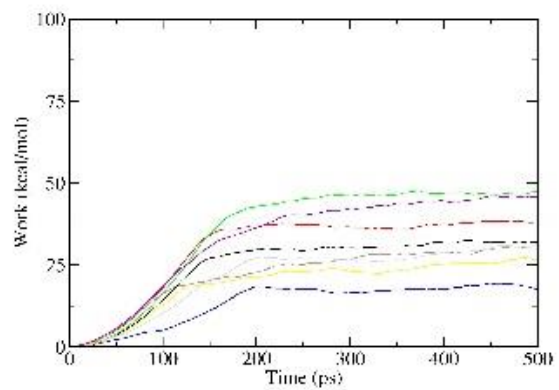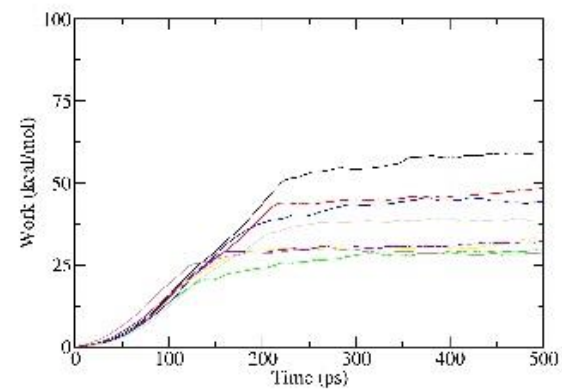

Penfluridol

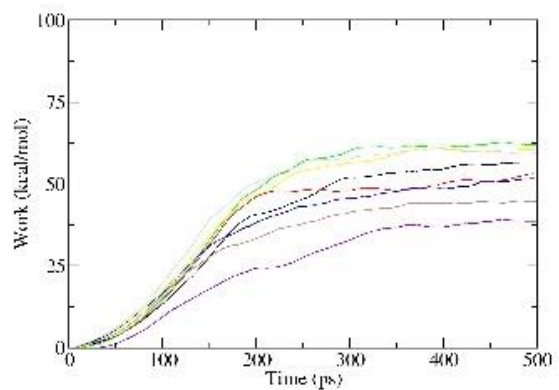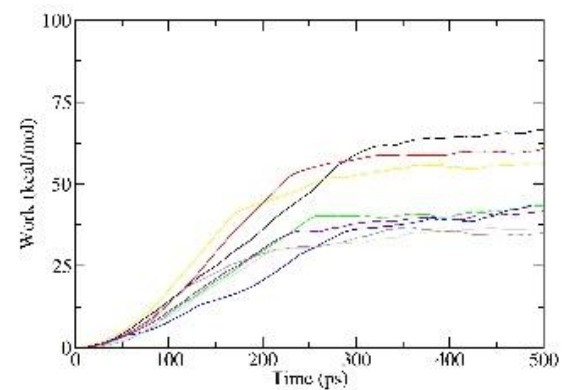

Phenazopyridine

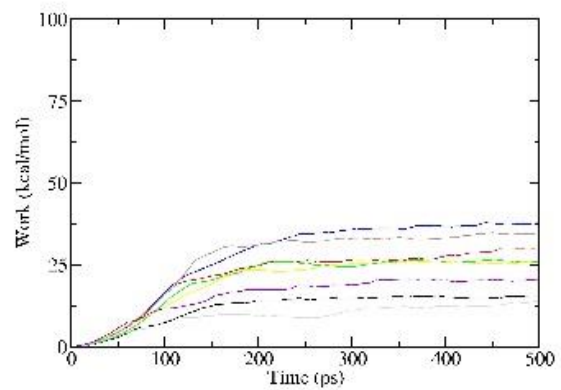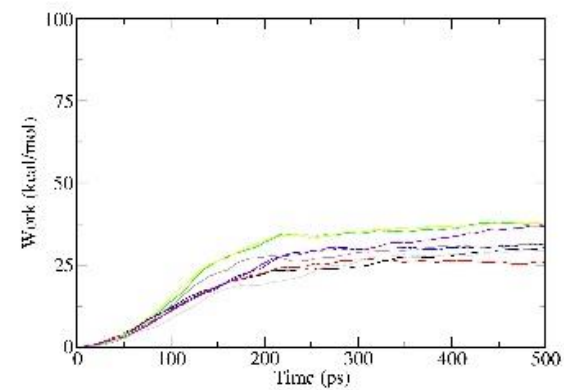

Proscillaridin

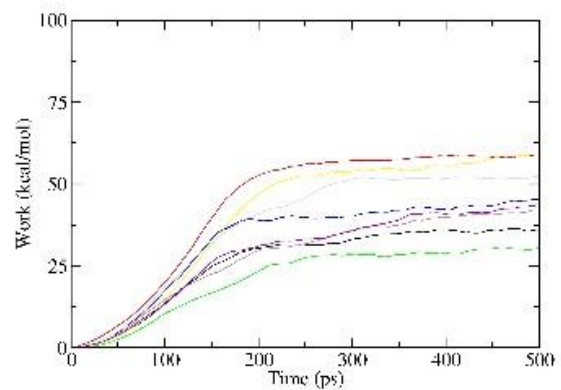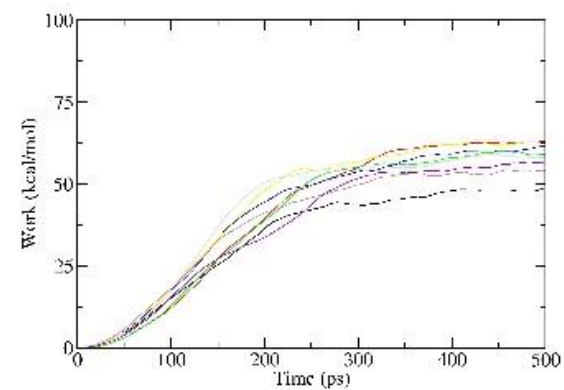

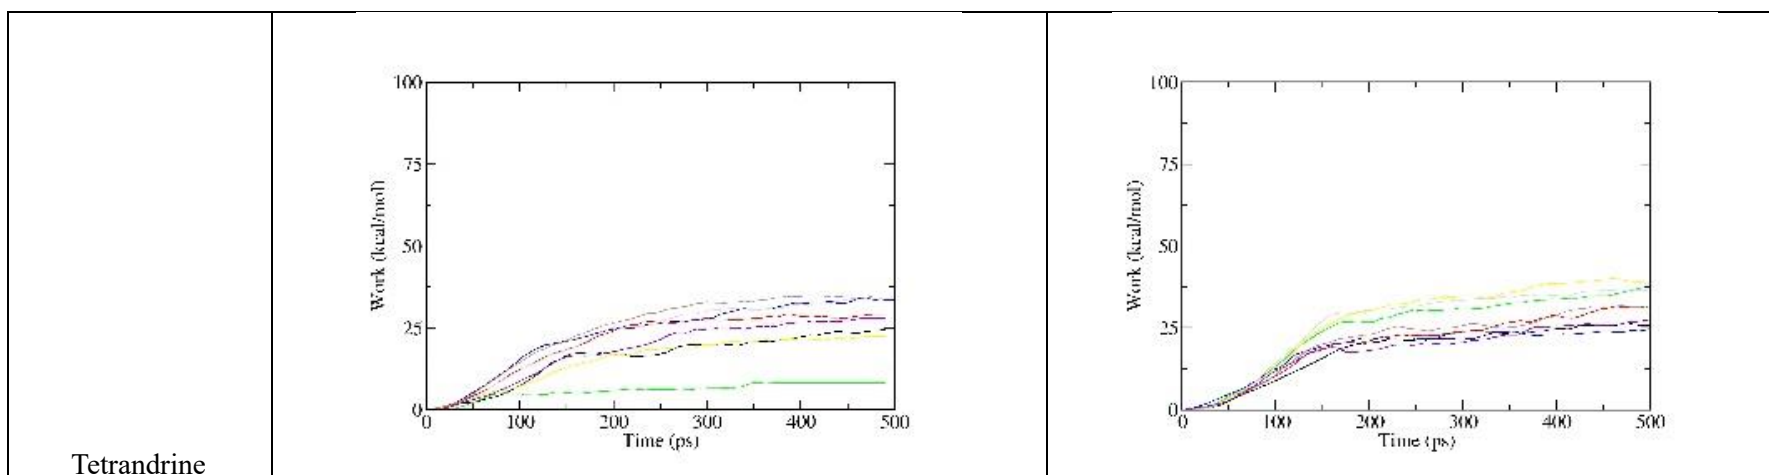

**Reference:**

1. Salentin, S.; Schreiber, S.; Haupt, V. J.; Adasme, M. F.; Schroeder, M., PLIP: fully automated protein–ligand interaction profiler. *Nucleic Acids Res.* **2015**, *43*, W443-W447.
